# Supplementary material
Source: PubMed Central journal article supplement (PMC5441713)
Supplement: pnas.1617862114.sapp.pdf [file pnas.1617862114.sapp.pdf]

## Supporting Information

### Differences between Measured and Reported Volatile Organic Compound Emissions from Oil Sands Facilities in Alberta, Canada

Shao-Meng Li<sup>1,\*</sup>, Amy Leithead<sup>1</sup>, Samar G. Moussa<sup>1</sup>, John Liggio<sup>1</sup>, Michael D. Moran<sup>1</sup>, Daniel Wang<sup>1</sup>, Katherine Hayden<sup>1</sup>, Andrea Darlington<sup>1</sup>, Mark Gordon<sup>1</sup>, Ralf Staebler<sup>1</sup>, Paul A. Makar<sup>1</sup>, Craig Stroud<sup>1</sup>, Robert McLaren<sup>2</sup>, Peter Liu<sup>1</sup>, Jason O'Brien<sup>1</sup>, Richard L. Mittermeier<sup>1</sup>, Junhua Zhang<sup>1</sup>, George Marson<sup>1</sup>, Stewart G. Cober<sup>1</sup>, Mengistu Wolde<sup>3</sup>, Jeremy J.B. Wentzell<sup>1</sup>

<sup>1</sup>Air Quality Research Division, Environment Canada, 4905 Dufferin Street, Toronto, Ontario M3H 5T4, Canada

<sup>2</sup>York University, 4700 Keele Street, Toronto, Ontario, M3J 1P3, Canada

<sup>3</sup>National Research Council Canada, Flight Research Laboratory, Ottawa, Canada K1A 0R6

\*corresponding author; 1-416-739-5731; [shao-meng.li@canada.ca](mailto:shao-meng.li@canada.ca)

## S1. Summary of Flights during the Aircraft Study over the Surface Mining Facilities in the Alberta Oil Sands Region

Table S1. Summary of flights during the aircraft study over the surface mining facilities in the Alberta Oil Sands Region

| Date        | Flight | Start Time (LST) | End Time (LST) | Flight Objectives                                | Facility Studied                     | Flight Design                                                                                      | Wind Direction  |
|-------------|--------|------------------|----------------|--------------------------------------------------|--------------------------------------|----------------------------------------------------------------------------------------------------|-----------------|
| 13-Aug-2013 | 1      |                  |                | Survey                                           | All                                  | Level flight at 350 m agl                                                                          | southeast       |
| 14-Aug-2013 | 2      | 11:52            | 15:23          | Emission quantification                          | SML                                  | Virtual box; virtual screen 150 to 1730 m agl                                                      | south southeast |
| 15-Aug-2013 | 3      | 12:54            | 17:42          | Emission quantification                          | SML, SUN, CNRL                       | Upwind spirals; virtual screens 150 to 1850 m agl                                                  | west            |
| 16-Aug-2013 | 4      | 13:20            | 18:07          | Emission quantification                          | All                                  | Upwind spirals; virtual screens 150 to 1850 m agl                                                  | southwest       |
| 17-Aug-2013 | 5      | 14:46            | 17:46          | Emission quantification<br>Satellite validation  | SUN                                  | Upwind spirals, spirals over satellite pixel; virtual box; 150 to 1800 m agl                       | southwest       |
| 19-Aug-2013 | 6      | 10:18            | 12:34          | Emission quantification                          | SML, SUN                             | Upwind spirals; virtual screens 150 to 660 m agl                                                   | west southwest  |
| 19-Aug-2013 | 7      | 14:08            | 19:09          | Transformation                                   | All                                  | Virtual screens; spirals 150 to 2800 m agl                                                         | west southwest  |
| 20-Aug-2013 | 8      | 9:58             | 13:34          | Emission quantification                          | CNRL                                 | Virtual box; spirals 150 to 1500 m agl                                                             | west southwest  |
| 21-Aug-2013 | 9      | 12:59            | 16:06          | Emission quantification                          | SAJ                                  | Virtual box; spirals 150 to 1700 m agl                                                             | west southwest  |
| 22-Aug-2013 | 10     | 13:26            | 16:57          | Emission quantification                          | SUN                                  | Virtual box; spirals 150 to 2000 m agl                                                             | west southwest  |
| 23-Aug-2013 | 11     | 10:54            | 15:50          | Survey                                           | All                                  | Level flight at 150 and 350 m agl                                                                  | southwest       |
| 24-Aug-2013 | 12     | 10:56            | 14:21          | Emission quantification                          | SML                                  | Virtual box; spirals 150 to 1730 m agl                                                             | southwest       |
| 26-Aug-2013 | 13     | 15:23            | 18:14          | Emission quantification                          | CNRL                                 | Virtual box; spirals 150 to 1050 m agl                                                             | northeast       |
| 28-Aug-2013 | 14     | 13:00            | 16:31          | Emission quantification                          | SUN                                  | Virtual box; spirals 150 to 1800 m agl                                                             | west            |
| 29-Aug-2013 | 15     | 14:03            | 19:37          | Emission quantification                          | SAJ, SUN, SAU                        | Virtual boxes; spirals 150 to 1030 m agl                                                           | north northeast |
| 31-Aug-2013 | 16     | 13:57            | 17:51          | Satellite validation                             | SUN, SAJ, SAU                        | Level flight at 350 m agl + spirals 150 to 5860 m agl                                              | west            |
| 02-Sep-2013 | 17     | 11:10            | 14:44          | Emission quantification                          | CNRL                                 | Virtual box; spirals 150 to 1630 m agl                                                             | north northwest |
| 03-Sep-2013 | 18     | 13:27            | 17:52          | Emission quantification<br>Satellite validation  | SML                                  | Virtual box; spirals 150 to 5400 m agl                                                             | southwest       |
| 04-Sep-2013 | 19     | 12:54            | 17:56          | Transformation                                   | All                                  | Virtual screens; spirals 150 to 1800 m agl                                                         | southwest       |
| 05-Sep-2013 | 20     | 13:33            | 18:38          | Transformation,<br>Satellite validation          | All                                  | Virtual screens; spirals 150 to 4800 m agl                                                         | west            |
| 06-Sep-2013 | 21     | 11:28            | 16:16          | Emission quantification                          | SAJ, IKL, SAU                        | Virtual boxes; spirals 150 to 1500 m agl                                                           | north           |
| 07-Sep-2013 | 22     | 12:25            | 16:02          | Satellite validation,<br>Emission quantification | All plus Firebag<br>in situ facility | Level flight at 350 m agl; spirals in satellite pixels 150 to 6000 m agl; virtual box over Firebag | southwest       |

Note: Short facility names are as follows: SML for Syncrude Mildred Lake; SUN for Suncor Millenium and Steepbank; CNRL for Canadian Natural Resources Ltd Horizon; SAJ for Shell Albian Sands (also known as Muskeg River) and Jackpine; SAU for Syncrude Aurora; IKL for Imperial Kearl Lake. agl – above ground level.

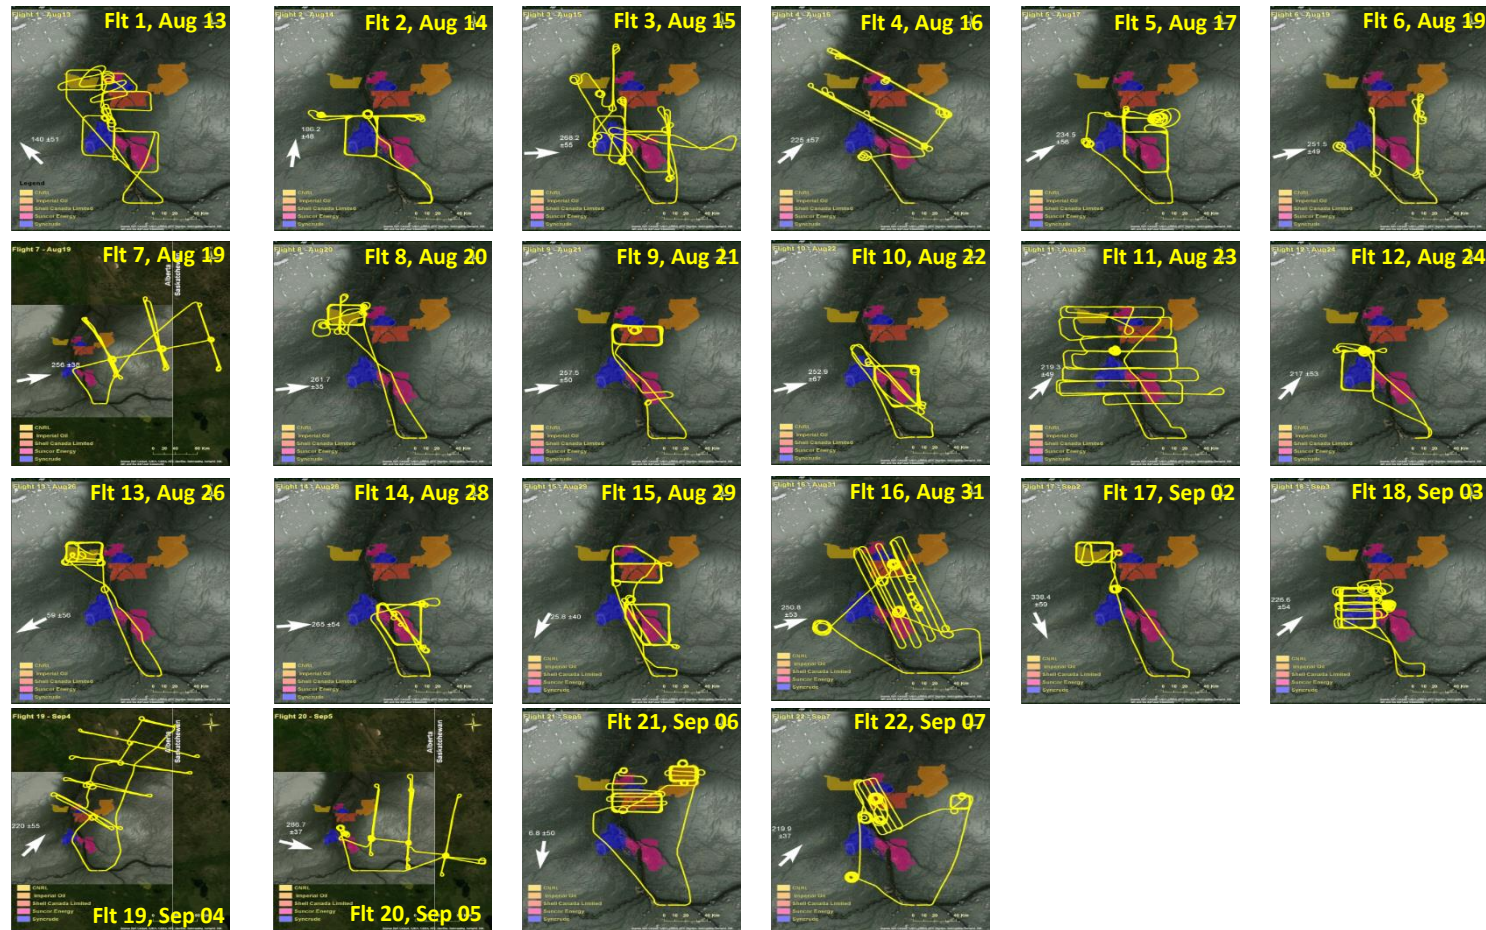

Figure S1. The flight tracks over the surface mining facilities in the Athabasca oil sands region, Alberta during the airborne study in Aug to Sep 2013. The aircraft made 22 flights, with four study objectives (1) emission quantitation and comparison with reported emissions; (2) air pollutant transport and transformation; (3) satellite retrieval validation, and (4) air quality model evaluation. The colors represent the different facilities: blue represents Syncrude Mildred Lake (SML) and Aurora (SAU) facilities; red represents Suncor Millenium/Steepbank (SUN) facility; yellow represents Canadian Natural Resources Ltd Horizon (CNRL) facility; darker orange color represents the Shell Muskeg River/Jackpine (SAJ) facility; and lighter orange color represents the Imperial Kearl Lake (IKL) facility. The white arrow in each plot shows the mean wind direction during the flight.

## S2. VOC+OH and VOC+O<sub>3</sub> Reaction Rate Constants

Table S2. Reaction rate constants for VOC+OH and VOC+O<sub>3</sub> measured as reported in Reference 1 or as predicted using a photochemical model in Reference 2. These constants were used in estimation of the oxidative loss correction factors **A** and their uncertainties **ΔA** of the VOCs during transport from sources within a facility to the aircraft interception downwind on the virtual box walls. O<sub>3</sub> mixing ratios of 30-40 ppb were based on observations, whereas OH concentrations of (1-5)×10<sup>6</sup> molec/cc were taken from a modelling analysis (Ref 34 in main text, repeated here as Ref 3) Empty entries in the facility columns indicate that there were no emission rates determined from this study for those species for the facility (see Table S3, below). The highlighted entries are for species with a correction factor >2.

| Compound                | Formula                         | K <sub>VOC+OH</sub> | Ref | K <sub>VOC+O<sub>3</sub></sub> | Ref | Correction Factors for Oxidative Loss |      |      |      |      |      |      |      |
|-------------------------|---------------------------------|---------------------|-----|--------------------------------|-----|---------------------------------------|------|------|------|------|------|------|------|
|                         |                                 |                     |     |                                |     | SML                                   |      | SUN  |      | CNRL |      | SAJ  |      |
|                         |                                 |                     |     |                                |     | A                                     | ± ΔA | A    | ± ΔA | A    | ± ΔA | A    | ± ΔA |
| <b>N-Alkanes</b>        |                                 |                     |     |                                |     |                                       |      |      |      |      |      |      |      |
| Ethane                  | C <sub>2</sub> H <sub>6</sub>   | 2.54E-13            | (1) |                                |     | 1.00                                  | 0.00 |      |      |      |      |      |      |
| Propane                 | C <sub>3</sub> H <sub>8</sub>   | 1.12E-12            | (1) |                                |     | 1.01                                  | 0.00 | 1.01 | 0.01 | 1.00 | 0.00 | 1.00 | 0.00 |
| Butane                  | C <sub>4</sub> H <sub>10</sub>  | 2.44E-12            | (1) |                                |     | 1.02                                  | 0.01 |      |      | 1.01 | 0.01 | 1.01 | 0.01 |
| Pentane                 | C <sub>5</sub> H <sub>12</sub>  | 4.00E-12            | (1) |                                |     | 1.03                                  | 0.01 | 1.04 | 0.02 | 1.02 | 0.01 | 1.02 | 0.02 |
| Hexane                  | C <sub>6</sub> H <sub>14</sub>  | 5.45E-12            | (1) |                                |     | 1.04                                  | 0.01 | 1.05 | 0.03 | 1.02 | 0.01 | 1.02 | 0.02 |
| Heptane                 | C <sub>7</sub> H <sub>16</sub>  | 7.02E-12            | (1) |                                |     | 1.06                                  | 0.02 | 1.07 | 0.04 | 1.03 | 0.02 | 1.03 | 0.03 |
| Octane                  | C <sub>8</sub> H <sub>18</sub>  | 8.71E-12            | (1) |                                |     | 1.07                                  | 0.02 | 1.08 | 0.05 | 1.03 | 0.02 | 1.04 | 0.03 |
| Nonane                  | C <sub>9</sub> H <sub>20</sub>  | 1.00E-11            | (1) |                                |     | 1.08                                  | 0.03 | 1.10 | 0.06 | 1.04 | 0.03 | 1.04 | 0.04 |
| Decane                  | C <sub>10</sub> H <sub>22</sub> | 1.12E-11            | (1) |                                |     | 1.09                                  | 0.03 | 1.11 | 0.06 | 1.04 | 0.03 |      |      |
| Undecane                | C <sub>11</sub> H <sub>24</sub> | 1.29E-11            | (1) |                                |     | 1.11                                  | 0.04 | 1.13 | 0.08 | 1.05 | 0.04 |      |      |
| Dodecane                | C <sub>12</sub> H <sub>26</sub> | 1.39E-11            | (1) |                                |     |                                       |      | 1.14 | 0.08 |      |      |      |      |
| <b>Branched Alkanes</b> |                                 |                     |     |                                |     |                                       |      |      |      |      |      |      |      |
| Isobutane               | C <sub>4</sub> H <sub>10</sub>  | 2.19E-12            | (1) |                                |     | 1.02                                  | 0.01 |      |      | 1.01 | 0.01 | 1.01 | 0.01 |
| 2-Methylbutane          | C <sub>5</sub> H <sub>12</sub>  | 3.70E-12            | (1) |                                |     | 1.03                                  | 0.01 | 1.03 | 0.02 | 1.01 | 0.01 | 1.02 | 0.01 |
| 2,2-Dimethylpropane     | C <sub>5</sub> H <sub>12</sub>  | 8.50E-13            | (1) |                                |     | 1.01                                  | 0.00 | 1.01 | 0.00 | 1.00 | 0.00 | 1.00 | 0.00 |
| 2-Methylpentane         | C <sub>6</sub> H <sub>14</sub>  | 5.30E-12            | (1) |                                |     | 1.04                                  | 0.01 | 1.05 | 0.03 | 1.02 | 0.01 | 1.02 | 0.02 |
| 3-Methylpentane         | C <sub>6</sub> H <sub>14</sub>  | 5.40E-12            | (1) |                                |     | 1.04                                  | 0.01 | 1.05 | 0.03 | 1.02 | 0.01 | 1.02 | 0.02 |
| 2,2-Dimethylbutane      | C <sub>6</sub> H <sub>14</sub>  | 2.34E-12            | (1) |                                |     | 1.02                                  | 0.01 | 1.02 | 0.01 | 1.01 | 0.01 | 1.01 | 0.01 |
| 2,3-Dimethylbutane      | C <sub>6</sub> H <sub>14</sub>  | 5.78E-12            | (1) |                                |     | 1.05                                  | 0.02 | 1.05 | 0.03 | 1.02 | 0.02 | 1.02 | 0.02 |

|                                 |        |          |     |          |     |      |      |      |      |      |      |      |      |
|---------------------------------|--------|----------|-----|----------|-----|------|------|------|------|------|------|------|------|
| 2-Methylhexane                  | C7H16  | 6.69E-12 | (1) |          |     | 1.05 | 0.02 | 1.06 | 0.04 | 1.03 | 0.02 | 1.03 | 0.03 |
| 3-Methylhexane                  | C7H16  | 6.30E-12 | (1) |          |     | 1.05 | 0.02 | 1.06 | 0.03 | 1.02 | 0.02 | 1.03 | 0.02 |
| 2,2-Dimethylpentane             | C7H16  | 3.40E-12 | (1) |          |     | 1.03 | 0.01 | 1.03 | 0.02 | 1.01 | 0.01 | 1.01 | 0.01 |
| 2,3-Dimethylpentane             | C7H16  | 1.95E-11 | (1) |          |     | 1.17 | 0.06 | 1.20 | 0.12 | 1.08 | 0.06 | 1.08 | 0.08 |
| 2,4-Dimethylpentane             | C7H16  | 5.00E-12 | (1) |          |     | 1.04 | 0.01 | 1.05 | 0.03 | 1.02 | 0.01 | 1.02 | 0.02 |
| 2,2,3-Trimethylbutane           | C7H16  | 4.24E-12 | (1) |          |     | 1.03 | 0.01 | 1.04 | 0.02 | 1.02 | 0.01 | 1.02 | 0.02 |
| 2-Methylheptane                 | C8H18  | 8.82E-12 | (1) |          |     | 1.07 | 0.02 | 1.08 | 0.05 | 1.03 | 0.02 | 1.04 | 0.03 |
| 3-Methylheptane                 | C8H18  | 9.24E-12 | (1) |          |     | 1.08 | 0.03 | 1.09 | 0.05 | 1.04 | 0.03 | 1.04 | 0.04 |
| 4-Methylheptane                 | C8H18  | 9.24E-12 | (1) |          |     | 1.08 | 0.03 | 1.09 | 0.05 | 1.04 | 0.03 | 1.04 | 0.04 |
| 2,4-Dimethylhexane              | C8H18  | 8.55E-12 | (1) |          |     | 1.07 | 0.02 | 1.08 | 0.05 | 1.03 | 0.02 | 1.04 | 0.03 |
| 2,5-Dimethylhexane              | C8H18  | 7.74E-12 | (1) |          |     | 1.06 | 0.02 | 1.07 | 0.04 | 1.03 | 0.02 | 1.03 | 0.03 |
| 2,3,4-Trimethylpentane          | C8H18  | 7.10E-12 | (1) |          |     | 1.06 | 0.02 | 1.07 | 0.04 | 1.03 | 0.02 | 1.03 | 0.03 |
| 2,2,5-Trimethylhexane           | C9H20  | 4.86E-12 | (1) |          |     |      |      | 1.05 | 0.03 | 1.02 | 0.01 |      |      |
| 3,6-Dimethyloctane              | C10H22 | 1.23E-11 | (1) |          |     | 1.10 | 0.04 | 1.12 | 0.07 |      |      |      |      |
| <b>Cycloalkenes</b>             |        |          |     |          |     |      |      |      |      |      |      |      |      |
| Cyclopentane                    | C5H10  | 5.02E-12 | (1) |          |     | 1.04 | 0.01 |      |      | 1.02 | 0.01 | 1.02 | 0.02 |
| Methylcyclopentane              | C6H12  | 6.96E-12 | (1) |          |     | 1.06 | 0.02 | 1.07 | 0.04 | 1.03 | 0.02 | 1.03 | 0.03 |
| Cyclohexane                     | C6H12  | 7.21E-12 | (1) |          |     | 1.06 | 0.02 | 1.07 | 0.04 | 1.03 | 0.02 | 1.03 | 0.03 |
| Methylcyclohexane               | C7H14  | 1.00E-11 | (1) |          |     | 1.08 | 0.03 | 1.10 | 0.06 | 1.04 | 0.03 | 1.04 | 0.04 |
| c-1,3-Dimethylcyclohexane       | C8H16  | 1.38E-11 | (1) |          |     | 1.12 | 0.04 | 1.14 | 0.08 | 1.06 | 0.04 | 1.06 | 0.05 |
| t-1,2-Dimethylcyclohexane       | C8H16  | 1.38E-11 | (1) |          |     | 1.12 | 0.04 | 1.14 | 0.08 | 1.06 | 0.04 | 1.06 | 0.05 |
| c-1,4/t-1,3-Dimethylcyclohexane | C8H16  | 1.38E-11 | (1) |          |     | 1.12 | 0.04 | 1.14 | 0.08 | 1.06 | 0.04 | 1.06 | 0.05 |
| t-1,4-Dimethylcyclohexane       | C8H16  | 1.38E-11 | (1) |          |     | 1.12 | 0.04 | 1.14 | 0.08 | 1.06 | 0.04 | 1.06 | 0.05 |
| c-1,2-Dimethylcyclohexane       | C8H16  | 1.38E-11 | (1) |          |     | 1.12 | 0.04 | 1.14 | 0.08 | 1.06 | 0.04 | 1.06 | 0.05 |
| <b>Aromatic Hydrocarbons</b>    |        |          |     |          |     |      |      |      |      |      |      |      |      |
| Benzene                         | C6H6   | 1.20E-12 | (1) |          |     | 1.01 | 0.00 | 1.01 | 0.01 | 1.00 | 0.00 | 1.00 | 0.00 |
| Toluene                         | C7H8   | 5.63E-12 | (1) | 4.53E-22 | (1) | 1.05 | 0.02 | 1.05 | 0.03 | 1.02 | 0.02 | 1.02 | 0.02 |
| m,p-Xylene                      | C8H10  | 1.90E-11 | (1) | 1.10E-21 | (1) | 1.16 | 0.06 | 1.19 | 0.12 | 1.08 | 0.06 | 1.08 | 0.08 |
| o-Xylene                        | C8H10  | 1.37E-11 | (1) | 1.72E-21 | (1) | 1.11 | 0.04 | 1.13 | 0.08 | 1.05 | 0.04 | 1.06 | 0.05 |
| Ethylbenzene                    | C8H10  | 7.10E-12 | (1) |          |     | 1.06 | 0.02 | 1.07 | 0.04 | 1.03 | 0.02 | 1.03 | 0.03 |

|                               |        |          |     |          |     |      |      |      |      |      |      |      |      |
|-------------------------------|--------|----------|-----|----------|-----|------|------|------|------|------|------|------|------|
| 1,2,3-Trimethylbenzene        | C9H12  | 3.27E-11 | (1) |          |     | 1.30 | 0.12 | 1.37 | 0.24 | 1.14 | 0.10 | 1.15 | 0.14 |
| 1,2,4-Trimethylbenzene        | C9H12  | 3.25E-11 | (1) |          |     | 1.30 | 0.12 | 1.37 | 0.24 |      |      | 1.15 | 0.14 |
| 1,3,5-Trimethylbenzene        | C9H12  | 5.75E-11 | (1) |          |     | 1.62 | 0.27 | 1.78 | 0.57 | 1.27 | 0.21 | 1.29 | 0.29 |
| 2-Ethyltoluene                | C9H12  | 1.23E-11 | (1) |          |     | 1.10 | 0.04 |      |      | 1.05 | 0.03 | 1.05 | 0.05 |
| 3-Ethyltoluene                | C9H12  | 1.92E-11 | (1) |          |     | 1.17 | 0.06 | 1.20 | 0.12 |      |      | 1.08 | 0.08 |
| 4-Ethyltoluene                | C9H12  | 1.21E-11 | (1) |          |     | 1.10 | 0.03 | 1.12 | 0.07 | 1.05 | 0.03 | 1.05 | 0.05 |
| n-Propylbenzene               | C9H12  | 6.00E-12 | (1) |          |     | 1.05 | 0.02 | 1.06 | 0.03 |      |      | 1.02 | 0.02 |
| i-Propylbenzene               | C9H12  | 7.79E-12 | (1) |          |     | 1.06 | 0.02 | 1.07 | 0.04 |      |      | 1.03 | 0.03 |
| n-Butylbenzene                | C10H14 | 1.31E-11 | (1) |          |     | 1.11 | 0.04 | 1.13 | 0.08 | 1.05 | 0.04 | 1.06 | 0.05 |
| iso-Butylbenzene              | C10H14 | 1.17E-11 | (1) |          |     | 1.10 | 0.03 | 1.11 | 0.07 | 1.05 | 0.03 | 1.05 | 0.05 |
| sec-Butylbenzene              | C10H14 | 1.17E-11 | (1) |          |     | 1.10 | 0.03 | 1.11 | 0.07 | 1.05 | 0.03 | 1.05 | 0.05 |
| tert-Butylbenzene             | C10H14 | 4.60E-12 | (1) |          |     |      |      |      |      | 1.02 | 0.01 |      |      |
| 1,2-Diethylbenzene            | C10H14 | 1.37E-11 | (1) |          |     | 1.11 | 0.04 | 1.13 | 0.08 |      |      | 1.06 | 0.05 |
| 1,3-Diethylbenzene            | C10H14 | 2.36E-11 | (1) |          |     | 1.21 | 0.08 | 1.25 | 0.16 | 1.10 | 0.07 | 1.10 | 0.10 |
| 1,4-Diethylbenzene            | C10H14 | 1.43E-11 | (1) |          |     | 1.12 | 0.04 | 1.14 | 0.09 | 1.06 | 0.04 | 1.06 | 0.06 |
| p-Cymene                      | C10H14 | 1.50E-11 | (1) |          |     | 1.13 | 0.04 |      |      |      |      | 1.06 | 0.06 |
| Hexylbenzene                  | C12H18 | 1.15E-11 | (1) |          |     |      |      | 1.11 | 0.07 |      |      |      |      |
| Styrene                       | C8H8   | 5.80E-11 | (2) | 1.70E-17 | (1) | 1.70 | 0.31 | 1.89 | 0.66 | 1.30 | 0.24 | 1.32 | 0.32 |
| Indane (2,3-Dihydroindene)    | C9H10  | 1.90E-11 | (1) |          |     | 1.16 | 0.06 | 1.19 | 0.12 | 1.08 | 0.06 | 1.08 | 0.08 |
| Naphthalene                   | C10H8  | 2.30E-11 | (1) | 2.01E-19 | (1) | 1.20 | 0.07 | 1.24 | 0.15 |      |      |      |      |
| <b>Straight Chain Alkenes</b> |        |          |     |          |     |      |      |      |      |      |      |      |      |
| Ethene                        | C2H4   | 8.52E-12 | (1) | 1.59E-18 | (1) | 1.07 | 0.03 |      |      |      |      | 1.04 | 0.03 |
| Propene                       | C3H6   | 2.63E-11 | (1) | 1.01E-17 | (1) | 1.3  | 0.1  |      |      |      |      | 1.1  | 0.1  |
| 1-Butene/2-Methylpropene      | C4H8   | 3.14E-11 | (1) | 1.02E-17 | (1) | 1.3  | 0.1  |      |      |      |      | 1.2  | 0.2  |
| c-2-Butene                    | C4H8   | 5.64E-11 | (1) | 1.25E-16 | (1) | 2.2  | 0.6  |      |      |      |      | 1.5  | 0.6  |
| t-2-Butene                    | C4H8   | 6.40E-11 | (1) | 1.90E-16 | (1) | 2.9  | 1.0  |      |      | 1.7  | 0.6  | 1.8  | 0.8  |
| 1-Pentene                     | C5H10  | 3.14E-11 | (1) | 1.00E-17 | (1) | 1.3  | 0.1  |      |      |      |      | 1.2  | 0.2  |
| c-2-Pentene                   | C5H10  | 6.50E-11 | (1) | 1.31E-16 | (1) |      |      |      |      |      |      | 1.6  | 0.7  |
| t-2-Pentene                   | C5H10  | 6.70E-11 | (1) | 1.60E-16 | (1) | 2.7  | 0.9  |      |      |      |      | 1.7  | 0.8  |
| 1-Hexene/2-Methyl-1-Pentene   | C6H12  | 3.70E-11 | (1) | 1.10E-17 | (1) | 1.4  | 0.2  |      |      |      |      | 1.2  | 0.2  |

|                                |        |          |     |          |     |      |      |      |      |      |      |      |      |
|--------------------------------|--------|----------|-----|----------|-----|------|------|------|------|------|------|------|------|
| c-2-Hexene                     | C6H12  | 6.00E-11 | (1) | 1.60E-16 | (1) |      |      | 3.1  | 1.8  |      |      |      |      |
| t-2-Hexene                     | C6H12  | 6.00E-11 | (1) | 1.60E-16 | (1) | 2.6  | 0.8  |      |      | 1.6  | 0.5  | 1.7  | 0.7  |
| t-3-Heptene                    | C7H14  | 6.76E-11 | (2) | 2.00E-16 | (2) | 3.1  | 1.1  | 3.9  | 2.6  |      |      |      |      |
| t-2-Heptene                    | C7H14  | 6.68E-11 | (2) | 2.00E-16 | (2) | 3.0  | 1.1  | 3.9  | 2.6  | 1.8  | 0.7  | 1.8  | 0.9  |
| 1-Octene                       | C8H16  | 4.14E-11 | (1) | 1.20E-17 | (2) |      |      |      |      |      |      | 1.2  | 0.2  |
| t-2-Octene                     | C8H16  | 6.94E-11 | (1) | 2.00E-16 | (2) |      |      |      |      | 1.8  | 0.7  |      |      |
| 1-Undecene                     | C11H22 | 4.79E-11 | (1) | 1.20E-17 | (2) |      |      |      |      | 1.2  | 0.2  |      |      |
| <b>Branched Alkenes</b>        |        |          |     |          |     |      |      |      |      |      |      |      |      |
| 2-Methyl-1-Butene              | C5H10  | 6.10E-11 | (1) | 1.60E-17 | (1) | 1.7  | 0.3  |      |      |      |      | 1.3  | 0.3  |
| 2-Methyl-2-Butene              | C5H10  | 8.69E-11 | (1) | 4.03E-16 | (1) |      |      |      |      |      |      | 2.9  | 2.2  |
| 3-Methyl-1-Butene              | C5H10  | 3.18E-11 | (1) | 1.10E-17 | (1) | 1.3  | 0.1  |      |      |      |      | 1.2  | 0.2  |
| 3-Methyl-1-Pentene             | C6H12  | 3.02E-11 | (2) | 1.20E-17 | (2) | 1.3  | 0.1  |      |      | 1.1  | 0.1  | 1.2  | 0.1  |
| 4-Methyl-1-Pentene             | C6H12  | 3.02E-11 | (2) | 1.20E-17 | (2) |      |      | 1.4  | 0.3  |      |      | 1.2  | 0.1  |
| c-3-Methyl-2-Pentene           | C6H12  | 8.83E-11 | (2) | 4.50E-16 | (1) |      |      |      |      |      |      | 3.2  | 2.5  |
| t-3-Methyl-2-Pentene           | C6H12  | 8.83E-11 | (1) | 5.60E-16 | (1) |      |      |      |      |      |      | 3.9  | 3.4  |
| t-4-Methyl-2-Pentene           | C6H12  | 6.10E-11 | (1) | 4.03E-16 | (1) |      |      |      |      | 2.4  | 1.4  |      |      |
| Cyclopentene                   | C5H8   | 6.73E-11 | (1) | 5.70E-16 | (1) |      |      |      |      |      |      | 3.5  | 2.9  |
| 1-Methylcyclopentene           | C6H10  | 9.38E-11 | (1) | 6.70E-16 | (1) |      |      |      |      | 4.6  | 4.5  | 5.0  | 4.8  |
| Cyclohexene                    | C6H10  | 6.77E-11 | (1) | 8.14E-17 | (1) | 2.2  | 0.6  | 2.6  | 1.3  |      |      |      |      |
| 1-Methylcyclohexene            | C7H12  | 9.44E-11 | (1) | 1.65E-16 | (1) | 3.6  | 1.5  | 4.9  | 3.7  | 1.9  | 0.9  |      |      |
| <b>Alkynes and Diene</b>       |        |          |     |          |     |      |      |      |      |      |      |      |      |
| Ethyne                         | C2H2   | 8.30E-13 | (1) | 1.00E-20 | (1) | 1.01 | 0.00 | 1.01 | 0.00 |      |      | 1.00 | 0.00 |
| Propyne                        | C3H4   | 6.15E-12 | (1) | 3.00E-20 | (2) |      |      |      |      |      |      | 1.03 | 0.02 |
| 1-Butyne                       | C4H6   | 8.16E-12 | (1) | 3.00E-20 | (2) |      |      |      |      |      |      | 1.03 | 0.03 |
| 1,3-Butadiene                  | C4H6   | 6.66E-11 | (1) | 6.30E-18 | (1) | 1.8  | 0.4  |      |      |      |      | 1.4  | 0.4  |
| <b>Oxygenated Hydrocarbons</b> |        |          |     |          |     |      |      |      |      |      |      |      |      |
| Methanol                       | CH4O   | 9.30E-13 | (1) |          |     | 1.01 | 0.00 |      |      | 1.00 | 0.00 |      |      |
| Formaldehyde                   | CH2O   | 9.20E-12 | (1) |          |     | 1.08 | 0.03 | 1.09 | 0.05 |      |      |      |      |
| Acetaldehyde                   | C2H4O  | 1.60E-11 | (1) |          |     | 1.14 | 0.05 |      |      |      |      | 1.07 | 0.06 |
| Acetone                        | C3H6O  | 2.20E-13 | (1) |          |     | 1.00 | 0.00 | 1.00 | 0.00 | 1.00 | 0.00 | 1.00 | 0.00 |

|                                |         |          |     |          |     |      |      |      |      |      |      |      |      |
|--------------------------------|---------|----------|-----|----------|-----|------|------|------|------|------|------|------|------|
| Acrolein                       | C3H4O   | 2.00E-11 | (1) | 9.00E-19 | (1) | 1.18 | 0.06 |      |      | 1.09 | 0.08 |      |      |
| MVK+MACR                       | C4H6O   | 2.49E-11 | (1) | 3.75E-18 | (1) | 1.2  | 0.1  | 1.3  | 0.2  | 1.1  | 0.1  | 1.12 | 0.11 |
| Butanone                       | C4H8O   | 1.50E-12 | (1) |          |     | 1.01 | 0.00 |      |      |      |      |      |      |
| <b>Chlorinate Hydrocarbons</b> |         |          |     |          |     |      |      |      |      |      |      |      |      |
| Chloromethane                  | CH3Cl   | 1.02E-13 | (1) |          |     |      |      |      |      | 1.00 | 0.00 |      |      |
| Dichloromethane                | CH2Cl2  | 1.22E-13 | (1) |          |     |      |      | 1.00 | 0.00 |      |      |      |      |
| Chloroform                     | CHCl3   | 1.00E-13 | (1) |          |     |      |      | 1.00 | 0.00 |      |      |      |      |
| 1,1-Dichloroethene             | C2H2Cl2 | 2.60E-13 | (1) | 3.58E-20 | (2) |      |      |      |      |      |      | 1.00 | 0.00 |
| 1,2-Dichloroethane             | C2H4Cl2 | 2.20E-13 | (1) |          |     | 1.00 | 0.00 | 1.00 | 0.00 | 1.00 | 0.00 |      |      |
| c-1,2-Dichloroethene           | C2H2Cl2 | 1.55E-13 | (1) | 1.79E-20 | (2) |      |      |      |      |      |      | 1.00 | 0.00 |
| Hexachlorobutadiene            | C4Cl6   | 3.00E-14 | (2) | 7.00E-23 | (2) |      |      | 1.00 | 0.00 |      |      | 1.00 | 0.00 |
| <b>Biogenic Hydrocarbons</b>   |         |          |     |          |     |      |      |      |      |      |      |      |      |
| Isoprene                       | C5H8    | 1.01E-10 | (1) | 1.28E-17 | (1) |      |      | 3.2  | 1.9  | 1.6  | 0.5  | 1.6  | 0.7  |
| a-Pinene                       | C10H16  | 5.37E-11 | (1) | 8.66E-17 | (1) |      |      | 2.3  | 1.0  | 1.4  | 0.3  | 1.4  | 0.4  |
| b-Pinene                       | C10H16  | 7.89E-11 | (1) | 1.50E-17 | (1) | 2.1  | 0.5  | 2.4  | 1.1  | 1.4  | 0.4  | 1.5  | 0.5  |
| Limonene                       | C10H16  | 1.71E-10 | (1) | 2.00E-16 | (1) |      |      | 5.7  | 6.7  |      |      |      |      |
| Camphene                       | C10H16  | 5.30E-11 | (1) | 9.00E-19 | (1) |      |      |      |      | 1.2  | 0.2  | 1.3  | 0.3  |

### S3. Results of Emission Rates of Individual VOC Compounds for Four Oil Sands Surface Mining Facilities

Table S3. The measurement-based top down emission rate (**E**) and its uncertainty (**ΔE**), both in tonnes/day, of each compound for the four oil sands surface mining facilities. VOC compounds that are NPRI Part 1 and Part 5 required reports when the emission rates exceed reporting criteria (*Methods*) are indicated.

Compounds highlighted in gray color indicate that they were matched to the NPRI Part 1 and Part 5 (Ref 4 to 6) Emission Reports of species for chemical profile comparison. Those highlighted in orange color would be reportable under either Part 1 or Part 5 (or both) reporting requirements when the daily rates were upscaled to annual rates after accounting for seasonal changes and subtracting the contributions from mining fleet, which is estimated below (*Section S6*). Those not highlighted are not required for reporting to the NPRI. Empty entries for any of the four facilities indicate that the compounds were quantified but there were no suitable tracers for determining emission rates (in other words, correlation with any tracer was below  $R^2 < 0.8$ ).



|                               |         |                            |                            | Emission Rates during Aug/Sep (tonnes/day) |            |             |            |             |            |             |            |
|-------------------------------|---------|----------------------------|----------------------------|--------------------------------------------|------------|-------------|------------|-------------|------------|-------------|------------|
| Compound                      | Formula | NPRI<br>Part 1<br>Required | NPRI<br>Part 5<br>Required | SML                                        |            | SUN         |            | CNRL        |            | SAJ         |            |
|                               |         |                            |                            | E                                          | ±ΔE        | E           | ±ΔE        | E           | ±ΔE        | E           | ±ΔE        |
| <b>N-Alkanes Total</b>        |         |                            |                            | <b>14.9</b>                                | <b>2.6</b> | <b>20.6</b> | <b>1.7</b> | <b>10.2</b> | <b>1.8</b> | <b>12.1</b> | <b>1.5</b> |
| Ethane                        | C2H6    | No                         | No                         | 1.31                                       | 0.44       |             |            |             |            |             |            |
| Propane                       | C3H8    | No                         | Yes                        | 1.46                                       | 0.65       | 1.69        | 0.38       | 1.75        | 0.66       | 0.66        | 0.15       |
| Butane                        | C4H10   | No                         | Yes                        | 0.25                                       | 0.17       |             |            | 1.35        | 0.51       | 0.42        | 0.09       |
| Pentane                       | C5H12   | No                         | Yes                        | 0.49                                       | 0.18       | 3.34        | 0.75       | 0.35        | 0.51       | 9.73        | 1.66       |
| Hexane                        | C6H14   | No                         | Yes                        | 1.15                                       | 0.42       | 4.32        | 1.00       | 0.79        | 0.30       | 2.28        | 0.40       |
| Heptane                       | C7H16   | No                         | Yes                        | 3.44                                       | 1.22       | 4.22        | 0.70       | 3.34        | 1.30       | 0.54        | 0.12       |
| Octane                        | C8H18   | No                         | Yes                        | 3.81                                       | 1.68       | 2.40        | 0.41       | 1.39        | 0.48       | 0.13        | 0.03       |
| Nonane                        | C9H20   | No                         | Yes                        | 2.40                                       | 1.16       | 1.65        | 0.36       | 0.83        | 0.30       | 0.08        | 0.02       |
| Decane                        | C10H22  | No                         | Yes                        | 0.41                                       | 0.22       | 0.25        | 0.09       | 0.36        | 0.13       |             |            |
| Undecane                      | C11H24  | No                         | No                         | 0.22                                       | 0.12       | 1.29        | 0.41       | 0.058       | 0.017      |             |            |
| Dodecane                      | C12H26  | No                         | Yes                        |                                            |            | 1.48        | 0.47       |             |            |             |            |
| <b>Branched Alkanes Total</b> |         |                            |                            | <b>10.0</b>                                | <b>2.1</b> | <b>11.0</b> | <b>0.8</b> | <b>31.8</b> | <b>5.2</b> | <b>20.6</b> | <b>2.0</b> |
| Isobutane                     | C4H10   | No                         | Yes                        | 0.23                                       | 0.12       |             |            | 7.02        | 2.35       | 1.12        | 0.31       |
| 2-Methylbutane                | C5H12   | No                         | Yes                        | 0.46                                       | 0.18       | 1.70        | 0.39       | 12.3        | 4.3        | 5.70        | 1.41       |
| 2,2-Dimethylpropane           | C5H12   | No                         | Yes                        | 0.15                                       | 0.12       | 0.49        | 0.11       | 1.12        | 0.63       | 0.04        | 0.01       |
| 2-Methylpentane               | C6H14   | No                         | Yes                        | 0.43                                       | 0.16       | 1.58        | 0.38       | 0.64        | 0.23       | 6.33        | 1.17       |
| 3-Methylpentane               | C6H14   | No                         | Yes                        | 0.29                                       | 0.10       | 1.04        | 0.24       | 3.58        | 1.28       | 3.62        | 0.66       |
| 2,2-Dimethylbutane            | C6H14   | No                         | Yes                        | 0.07                                       | 0.04       | 0.13        | 0.03       | 0.53        | 0.16       | 1.00        | 0.14       |
| 2,3-Dimethylbutane            | C6H14   | No                         | Yes                        | 0.20                                       | 0.15       | 0.063       | 0.024      | 1.22        | 0.55       | 1.27        | 0.45       |
| 2-Methylhexane                | C7H16   | No                         | Yes                        | 0.64                                       | 0.22       | 0.94        | 0.15       | 0.47        | 0.16       | 0.23        | 0.05       |
| 3-Methylhexane                | C7H16   | No                         | Yes                        | 1.12                                       | 0.36       | 1.57        | 0.24       | 0.76        | 0.24       | 0.36        | 0.08       |
| 2,2-Dimethylpentane           | C7H16   | No                         | Yes                        | 0.02                                       | 0.01       | 0.01        | 0.00       | 0.22        | 0.07       | 0.06        | 0.01       |
| 2,3-Dimethylpentane           | C7H16   | No                         | Yes                        | 0.43                                       | 0.14       | 0.50        | 0.08       | 0.84        | 0.28       | 0.20        | 0.04       |
| 2,4-Dimethylpentane           | C7H16   | No                         | Yes                        | 0.07                                       | 0.03       | 0.05        | 0.01       | 0.17        | 0.11       | 0.15        | 0.03       |

|                                    |        |     |     |            |            |            |            |             |            |            |            |
|------------------------------------|--------|-----|-----|------------|------------|------------|------------|-------------|------------|------------|------------|
| 2,2,3-Trimethylbutane              | C7H16  | No  | Yes | 0.13       | 0.06       | 0.15       | 0.03       | 0.34        | 0.13       | 0.30       | 0.06       |
| 2-Methylheptane                    | C8H18  | No  | Yes | 3.12       | 1.92       | 1.55       | 0.54       | 0.90        | 0.32       | 0.10       | 0.04       |
| 3-Methylheptane                    | C8H18  | No  | Yes | 1.25       | 0.48       | 0.58       | 0.11       | 0.60        | 0.23       | 0.04       | 0.01       |
| 4-Methylheptane                    | C8H18  | No  | Yes | 0.81       | 0.30       | 0.39       | 0.08       | 0.46        | 0.17       | 0.05       | 0.01       |
| 2,4-Dimethylhexane                 | C8H18  | No  | Yes | 0.17       | 0.14       | 0.08       | 0.01       | 0.33        | 0.14       | 0.01       | 0.00       |
| 2,5-Dimethylhexane                 | C8H18  | No  | Yes | 0.13       | 0.04       | 0.08       | 0.01       | 0.14        | 0.04       | 0.02       | 0.00       |
| 2,3,4-Trimethylpentane             | C8H18  | No  | Yes | 0.10       | 0.04       | 0.016      | 0.002      | 0.13        | 0.04       | 0.002      | 0.001      |
| 2,2,5-Trimethylhexane              | C9H20  | No  | Yes |            |            | 0.005      | 0.002      | 0.010       | 0.003      |            |            |
| 3,6-Dimethyloctane                 | C10H22 | No  | Yes | 0.11       | 0.11       | 0.056      | 0.014      |             |            |            |            |
| <b>Cycloalkanes Total</b>          |        |     |     | <b>5.8</b> | <b>0.9</b> | <b>4.6</b> | <b>0.4</b> | <b>15.6</b> | <b>3.3</b> | <b>4.9</b> | <b>0.5</b> |
| Cyclopentane                       | C5H10  | No  | Yes | 0.01       | 0.003      |            |            | 1.65        | 0.61       | 2.07       | 0.40       |
| Methylcyclopentane                 | C6H12  | No  | Yes | 0.82       | 0.26       | 1.85       | 0.40       | 3.13        | 1.03       | 1.33       | 0.29       |
| Cyclohexane                        | C6H12  | Yes | No  | 0.54       | 0.19       | 0.58       | 0.13       | 4.01        | 1.42       | 0.64       | 0.15       |
| Methylcyclohexane                  | C7H14  | No  | Yes | 2.11       | 0.67       | 1.18       | 0.18       | 3.01        | 1.20       | 0.29       | 0.07       |
| c-1,3-Dimethylcyclohexane          | C8H16  | No  | Yes | 0.77       | 0.36       | 0.35       | 0.05       | 1.75        | 1.01       | 0.11       | 0.02       |
| t-1,2-Dimethylcyclohexane          | C8H16  | No  | Yes | 0.73       | 0.39       | 0.32       | 0.08       | 1.0         | 0.3        | 0.05       | 0.01       |
| c-1,4/t-1,3-Dimethylcyclohexane    | C8H16  | No  | Yes | 0.42       | 0.16       | 0.17       | 0.02       | 0.41        | 2.2        | 0.02       | 0.00       |
| t-1,4-Dimethylcyclohexane          | C8H16  | No  | Yes | 0.16       | 0.06       | 0.11       | 0.02       | 0.48        | 0.18       | 0.04       | 0.01       |
| c-1,2-Dimethylcyclohexane          | C8H16  | No  | Yes | 0.26       | 0.10       | 0.065      | 0.008      | 0.17        | 0.21       | 0.38       | 0.06       |
| <b>Aromatic Hydrocarbons Total</b> |        |     |     | <b>9.7</b> | <b>1.6</b> | <b>7.7</b> | <b>0.5</b> | <b>2.1</b>  | <b>0.3</b> | <b>1.6</b> | <b>0.3</b> |
| Benzene                            | C6H6   | Yes | Yes | 0.24       | 0.07       | 0.25       | 0.04       | 0.02        | 0.03       | 1.20       | 0.25       |
| Toluene                            | C7H8   | Yes | Yes | 2.19       | 0.71       | 1.86       | 0.30       | 0.64        | 0.24       | 0.01       | 0.00       |
| m,p-Xylene                         | C8H10  | Yes | Yes | 2.56       | 1.01       | 1.94       | 0.29       | 0.36        | 0.12       | 0.05       | 0.01       |
| o-Xylene                           | C8H10  | Yes | Yes | 0.98       | 0.37       | 0.69       | 0.09       | 0.09        | 0.02       | 0.03       | 0.01       |
| Ethylbenzene                       | C8H10  | Yes | Yes | 1.68       | 0.83       | 0.45       | 0.06       | 0.18        | 0.07       | 0.03       | 0.01       |
| 1,2,3-Trimethylbenzene             | C9H12  | No  | Yes | 0.17       | 0.06       | 0.31       | 0.04       | 0.23        | 0.08       | 0.01       | 0.00       |
| 1,2,4-Trimethylbenzene             | C9H12  | Yes | Yes | 0.34       | 0.11       | 0.49       | 0.07       |             |            | 0.002      | 0.001      |
| 1,3,5-Trimethylbenzene             | C9H12  | No  | Yes | 0.15       | 0.04       | 0.26       | 0.03       | 0.28        | 0.08       | 0.02       | 0.00       |
| 2-Ethyltoluene                     | C9H12  | No  | No  | 0.25       | 0.07       |            |            | 0.045       | 0.014      | 0.01       | 0.00       |

|                                     |        |     |     |             |             |             |             |             |             |             |             |
|-------------------------------------|--------|-----|-----|-------------|-------------|-------------|-------------|-------------|-------------|-------------|-------------|
| 3-Ethyltoluene                      | C9H12  | No  | No  | 0.32        | 0.12        | 0.27        | 0.04        |             |             | 0.02        | 0.00        |
| 4-Ethyltoluene                      | C9H12  | No  | No  | 0.20        | 0.06        | 0.16        | 0.02        | 0.058       | 0.024       | 0.01        | 0.00        |
| n-Propylbenzene                     | C9H12  | No  | Yes | 0.17        | 0.05        | 0.22        | 0.05        |             |             | 0.02        | 0.01        |
| i-Propylbenzene                     | C9H12  | No  | Yes | 0.10        | 0.05        | 0.02        | 0.01        |             |             | 0.00        | 0.00        |
| n-Butylbenzene                      | C10H14 | No  | No  | 0.08        | 0.03        | 0.098       | 0.021       | 0.021       | 0.010       | 0.006       | 0.001       |
| iso-Butylbenzene                    | C10H14 | No  | No  | 0.009       | 0.007       | 0.012       | 0.003       | 0.027       | 0.154       | 0.009       | 0.001       |
| sec-Butylbenzene                    | C10H14 | No  | No  | 0.016       | 0.003       | 0.092       | 0.023       | 0.021       | 0.021       | 0.010       | 0.003       |
| tert-Butylbenzene                   | C10H14 | No  | No  |             |             |             |             | 0.010       | 0.003       |             |             |
| 1,2-Diethylbenzene                  | C10H14 | No  | No  | 0.02        | 0.01        | 0.060       | 0.016       |             |             | 0.001       | 0.000       |
| 1,3-Diethylbenzene                  | C10H14 | No  | No  | 0.03        | 0.01        | 0.072       | 0.016       | 0.062       | 0.068       | 0.008       | 0.002       |
| 1,4-Diethylbenzene                  | C10H14 | No  | No  | 0.08        | 0.02        | 0.038       | 0.007       | 0.031       | 0.055       | 0.015       | 0.003       |
| p-Cymene                            | C10H14 | No  | No  | 0.011       | 0.007       |             |             |             |             | 0.055       | 0.013       |
| Hexylbenzene                        | C12H18 | No  | No  |             |             | 0.048       | 0.014       |             |             |             |             |
| Styrene                             | C8H8   | Yes | Yes | 0.01        | 0.00        | 0.019       | 0.004       | 0.027       | 0.010       | 0.02        | 0.00        |
| Indane (2,3-Dihydroindene)          | C9H10  | No  | No  | 0.09        | 0.03        | 0.13        | 0.01        | 0.041       | 0.007       | 0.010       | 0.002       |
| Naphthalene                         | C10H8  | Yes | No  | 0.04        | 0.04        | 0.20        | 0.09        |             |             |             |             |
| <b>Straight Chain Alkenes Total</b> |        |     |     | <b>0.71</b> | <b>0.25</b> | <b>0.26</b> | <b>0.03</b> | <b>2.48</b> | <b>0.65</b> | <b>2.23</b> | <b>0.21</b> |
| Ethene                              | C2H4   | Yes | Yes | 0.22        | 0.22        |             |             |             |             | 0.79        | 0.17        |
| Propene                             | C3H6   | Yes | Yes | 0.13        | 0.10        |             |             |             |             | 0.21        | 0.04        |
| 1-Butene/2-Methylpropene            | C4H8   | No  | Yes | 0.091       | 0.044       |             |             |             |             | 0.24        | 0.04        |
| c-2-Butene                          | C4H8   | No  | Yes | 0.020       | 0.013       |             |             |             |             | 0.005       | 0.001       |
| t-2-Butene                          | C4H8   | No  | Yes | 0.032       | 0.034       |             |             | 0.031       | 0.010       | 0.001       | 0.001       |
| 1-Pentene                           | C5H10  | No  | Yes | 0.042       | 0.017       |             |             |             |             | 0.019       | 0.003       |
| c-2-Pentene                         | C5H10  | No  | Yes |             |             |             |             |             |             | 0.031       | 0.008       |
| t-2-Pentene                         | C5H10  | No  | Yes | 0.027       | 0.017       |             |             |             |             | 0.38        | 0.08        |
| 1-Hexene/2-Methyl-1-Pentene         | C6H12  | No  | Yes | 0.065       | 0.034       |             |             |             |             | 0.092       | 0.014       |
| c-2-Hexene                          | C6H12  | No  | Yes |             |             | 0.06        | 0.01        |             |             |             |             |
| t-2-Hexene                          | C6H12  | No  | Yes | 0.021       | 0.017       |             |             | 0.024       | 0.007       | 0.039       | 0.006       |
| t-3-Heptene                         | C7H14  | No  | Yes | 0.032       | 0.034       | 0.09        | 0.02        |             |             |             |             |

|                                        |        |     |     |             |             |             |             |             |             |             |             |
|----------------------------------------|--------|-----|-----|-------------|-------------|-------------|-------------|-------------|-------------|-------------|-------------|
| t-2-Heptene                            | C7H14  | No  | Yes | 0.025       | 0.024       | 0.11        | 0.02        | 0.007       | 0.003       | 0.006       | 0.001       |
| 1-Octene                               | C8H16  | No  | No  |             |             |             |             |             |             | 0.42        | 0.09        |
| t-2-Octene                             | C8H16  | No  | No  |             |             |             |             | 2.13        | 0.65        |             |             |
| 1-Undecene                             | C11H22 | No  | No  |             |             |             |             | 0.29        | 0.09        |             |             |
| <b>Branched and Cycloalkenes Total</b> |        |     |     | <b>0.1</b>  | <b>0.04</b> | <b>0.4</b>  | <b>0.04</b> | <b>0.12</b> | <b>0.07</b> | <b>1.95</b> | <b>0.30</b> |
| 2-Methyl-1-Butene                      | C5H10  | No  | Yes | 0.025       | 0.013       |             |             |             |             | 0.04        | 0.01        |
| 2-Methyl-2-Butene                      | C5H10  | No  | Yes |             |             |             |             |             |             | 0.92        | 0.24        |
| 3-Methyl-1-Butene                      | C5H10  | No  | Yes | 0.011       | 0.003       |             |             |             |             | 0.010       | 0.002       |
| 3-Methyl-1-Pentene                     | C6H12  | No  | Yes | 0.012       | 0.013       |             |             | 0.007       | 0.003       | 0.007       | 0.005       |
| 4-Methyl-1-Pentene                     | C6H12  | No  | Yes |             |             | 0.06        | 0.01        |             |             | 0.008       | 0.005       |
| c-3-Methyl-2-Pentene                   | C6H12  | No  | Yes |             |             |             |             |             |             | 0.31        | 0.09        |
| t-3-Methyl-2-Pentene                   | C6H12  | No  | Yes |             |             |             |             |             |             | 0.016       | 0.011       |
| t-4-Methyl-2-Pentene                   | C6H12  | No  | Yes |             |             |             |             | 0.086       | 0.038       |             |             |
| Cyclopentene                           | C5H8   | No  | No  |             |             |             |             |             |             | 0.51        | 0.16        |
| 1-Methylcyclopentene                   | C6H10  | No  | Yes |             |             |             |             | 0.017       | 0.055       | 0.12        | 0.04        |
| Cyclohexene                            | C6H10  | No  | Yes | 0.024       | 0.024       | 0.06        | 0.01        |             |             |             |             |
| 1-Methylcyclohexene                    | C7H12  | No  | No  | 0.075       | 0.030       | 0.25        | 0.04        | 0.014       | 0.007       |             |             |
| <b>Alkynes and Dienes Total</b>        |        |     |     | <b>0.07</b> | <b>0.02</b> | <b>0.28</b> | <b>0.06</b> | <b>0</b>    | <b>0</b>    | <b>0.56</b> | <b>0.08</b> |
| Ethyne                                 | C2H2   | No  | Yes | 0.058       | 0.024       | 0.28        | 0.06        |             |             | 0.560       | 0.078       |
| Propyne                                | C3H4   | No  | No  |             |             |             |             |             |             | 0.027       | 0.007       |
| 1-Butyne                               | C4H6   | No  | No  |             |             |             |             |             |             | 0.001       | 0.000       |
| 1,3-Butadiene                          | C4H6   | Yes | Yes | 0.008       | 0.007       |             |             |             |             | 0.017       | 0.003       |
| <b>Oxygenated Hydrocarbons Total</b>   |        |     |     | <b>8.5</b>  | <b>1.3</b>  | <b>4.0</b>  | <b>0.5</b>  | <b>7.05</b> | <b>0.90</b> | <b>0.63</b> | <b>0.67</b> |
| Methanol                               | CH4O   | No  | Yes | 2.47        | 0.85        |             |             | 3.13        | 0.62        |             |             |
| Formaldehyde                           | CH2O   | Yes | Yes | 1.83        | 0.63        | 0.68        | 0.14        |             |             |             |             |
| Acetaldehyde                           | C2H4O  | Yes | No  | 0.90        | 0.25        |             |             |             |             | 0.082       | 0.087       |
| Acetone                                | C3H6O  | No  | No  | 1.78        | 0.60        | 1.11        | 0.22        | 1.95        | 0.29        | 0.13        | 0.30        |
| Acrolein                               | C3H4O  | Yes | No  | 0.05        | 0.02        |             |             |             |             | 0.024       | 0.13        |
| MVK+MACR                               | C4H6O  | No  | No  | 0.95        | 0.33        | 2.18        | 0.44        | 1.71        | 0.60        | 0.40        | 0.01        |

|                                        |         |     |     |             |             |             |             |             |             |              |              |
|----------------------------------------|---------|-----|-----|-------------|-------------|-------------|-------------|-------------|-------------|--------------|--------------|
| Butanone                               | C4H8O   | No  | No  | 0.56        | 0.20        |             |             |             |             |              |              |
| <b>Chlorinated Hydrocarbons Total</b>  |         |     |     | <b>0.01</b> | <b>0.00</b> | <b>0.17</b> | <b>0.02</b> | <b>0.27</b> | <b>0.12</b> | <b>0.011</b> | <b>0.003</b> |
| Chloromethane                          | CH3Cl   | Yes | No  |             |             |             |             | 0.24        | 0.12        |              |              |
| Dichloromethane                        | CH2Cl2  | Yes | No  |             |             | 0.063       | 0.013       |             |             |              |              |
| Chloroform                             | CHCl3   | Yes | No  |             |             | 0.018       | 0.004       |             |             |              |              |
| 1,1-Dichloroethene                     | C2H2Cl2 | No  | No  |             |             |             |             |             |             | 0.001        | 0.000        |
| 1,2-Dichloroethane                     | C2H4Cl2 | Yes | Yes | 0.01        | 0.003       | 0.012       | 0.003       | 0.03        | 0.01        |              |              |
| c-1,2-Dichloroethene                   | C2H2Cl2 | No  | No  |             |             |             |             |             |             | 0.001        | 0.000        |
| Hexachlorobutadiene                    | C4Cl6   | No  | No  |             |             | 0.082       | 0.014       |             |             | 0.009        | 0.003        |
| <b>Facility Sum (aE<sub>voc</sub>)</b> |         |     |     | <b>49.9</b> | <b>4.0</b>  | <b>49.0</b> | <b>2.1</b>  | <b>69.5</b> | <b>6.5</b>  | <b>46.4</b>  | <b>2.8</b>   |
| <b>Biogenic Hydrocarbons Total</b>     |         |     |     | <b>0.17</b> | <b>0.09</b> | <b>6.70</b> | <b>1.46</b> | <b>5.78</b> | <b>1.33</b> | <b>1.47</b>  | <b>0.16</b>  |
| Isoprene                               | C5H8    | Yes | No  |             |             | 5.92        | 1.5         | 3.57        | 1.23        | 0.39         | 0.10         |
| a-Pinene                               | C10H16  | No  | Yes |             |             | 0.64        | 0.17        | 0.47        | 0.16        | 0.32         | 0.06         |
| b-Pinene                               | C10H16  | No  | Yes | 0.17        | 0.08        | 0.12        | 0.03        | 1.13        | 0.42        | 0.45         | 0.09         |
| Limonene                               | C10H16  | No  | Yes |             |             | 0.073       | 0.017       |             |             |              |              |
| Camphene                               | C10H16  | No  | No  |             |             |             |             | 0.60        | 0.22        | 0.32         | 0.06         |

#### S4. Regression of Canister VOC compounds with Tracers from PTRMS

A number of VOCs in canister samples in plumes from the oil sands surface mining facilities were tightly correlated with selected PTRMS VOCs. Examples below in Figure S2 show such correlation between 5 VOCs in canister samples with C<sub>7</sub>H<sub>8</sub> measured using PTRMS, 5 VOCs in canister samples with C<sub>8</sub>H<sub>10</sub> measured using PTRMS, and 5 other VOCs in canister samples with C<sub>9</sub>H<sub>12</sub> from PTRMS for the SML facility. The canisters were collected in downwind plumes of the facility over different days on different flights, and the corresponding PTRMS data were similarly from these different days.

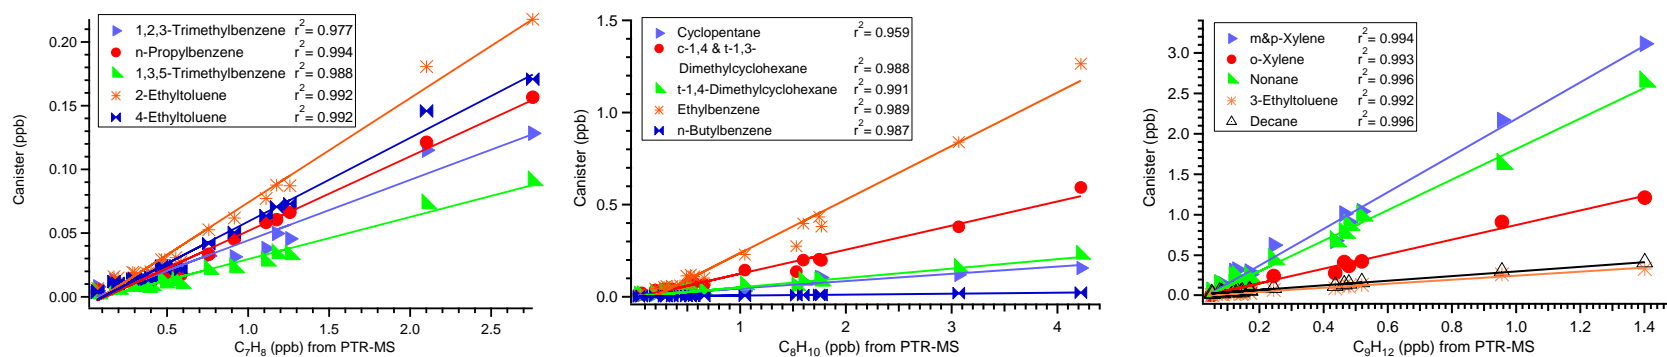

Figure S2. Regressions of 15 VOCs in canister samples to PTRMS C<sub>7</sub>H<sub>8</sub> (left), C<sub>8</sub>H<sub>10</sub> (centre), and C<sub>9</sub>H<sub>12</sub> (right) in plumes of the SML facility. The slopes of the regression lines in the correlation of these compounds in canister samples with C<sub>7</sub>H<sub>8</sub>, C<sub>8</sub>H<sub>10</sub>, and C<sub>9</sub>H<sub>12</sub>, respectively, are used to derive emission ratios at sources (*Methods*). Note the correlation coefficients R<sup>2</sup> are all >0.95. For other compounds, R<sup>2</sup> drops (see Table S8). A cutoff R<sup>2</sup> was arbitrarily set at R<sup>2</sup>=0.80 for calculating the emission ratios.

## S5. Estimation of Uncertainties in Mining Fleet Emissions

The VOC emissions from the mining truck fleet ( $E_{mt}$ ) are not required in the reports to NPRI (Ref 4), but they were part of the aggregate emission rate of VOCs from a facility ( $aE$ ) as determined from the aircraft measurements. Hence to compare  $aE$  with those reported to NPRI,  $E_{mt}$  must be subtracted from  $aE$ .  $E_{mt}$  is reported separately to Alberta Environment and Parks. For the year 2013, it may be estimated using the daily mining truck VOC emissions estimated for 2010 (Ref 39 in main text; repeated here as Ref 7) reported to Alberta Environment and Parks, but scaled to the 2013 volumes of mined oil sands (Ref 40 in main text; repeated here as Ref 8).

Reference 6 reported the mining truck VOC emissions for the year 2010 but did not include estimates of uncertainties and did not present how the emissions were derived. However, it appears that the VOC emissions were determined based on EPA Tier I truck emission factors, judging by the references provided in the report. Hence, it is possible to provide a rough estimate of the uncertainties in these results here by comparing real measurements of NO<sub>x</sub> emission factors for these trucks as reported by Watson et al. (Ref 9).

Based on the study conducted by Watson et al. (2013) (Ref 9), these EPA Tier I truck emission factors may have been slightly higher than real emission factors for the oil sands mining fleet. Watson et al. (2013) showed that NO<sub>x</sub> emissions from the mining trucks under real operating conditions in the oil sands have a NO<sub>x</sub> emission factor lower than the EPA TIER 1 NO<sub>x</sub> emission factors by about 10%. This difference may be considered as an indicator of the uncertainties in mining fleet VOC emission estimation used in Reference 7. Assuming that the EPA Tier emission factors used for VOCs emission estimates in Reference 7 were similarly higher by the same margin as was the case for NO<sub>x</sub>, then the

actual mining truck VOC emissions would be 10% lower than the values estimated in the paper, and the mining fleet VOC emission  $E_{mt}$  subtraction from the aggregate emission rate of VOCs  $aE$  would be 10% smaller than presented in the paper. The end results would re-enforce the conclusion that emission reports underestimated the real emissions.

Bitumen production data are closely tracked by the Government of Alberta, as these data form the basis for calculation of royalties, which the facilities must remit to the government. Since no specific uncertainties were reported in Reference 8, the relative uncertainties of the oil sands mined on a daily basis were approximated with the standard errors of the monthly data over a moving window of 3-month period (adjusted for the number of days within a month). It is probable that the standard error in the 3-monthly data on oil sands mined vastly overestimated the relative uncertainties in the daily production data, and as such, the uncertainties in the mining fleet VOC emissions were likely overestimated. However, given the small contributions of  $E_{mt}$  to  $aE$ , this overestimation of uncertainties had little impact on the comparison between  $(aE - E_{mt})$  with the facility total VOC emission reports to NPRI.

#### **S6. Estimation of On-Road Traffic Emissions from the Road Sections Included in the Virtual Flight Boxes over the SML and SUN Facilities.**

Highway 63, the main highway through the oil sands surface mining region, runs through the virtual flight boxes over both the SML and SUN facilities with different road lengths included in these boxes. As such, any VOC emissions from the on-road traffic in these boxes need to be subtracted from the aggregate emission rate of VOCs ( $aE$ ) for comparison with the reported VOC emissions to the NPRI.

For the virtual boxes over the SML and SUN facilities, small stretches (17 km and 13 km, respectively) of Hwy 63 went through the flight virtual boxes. Reference 7 reported that for the road section from Fort Mackay to Ruth Lake (22 km in length, indicated by yellow pins in Figure S3 below) the total VOC emissions were 0.135 t/d (Table S4). Part of this road length, 17 km, was inside the flight box over the SML facility. Thus, the VOC emissions from this section are estimated as  $0.135 \times (17/22) = 0.10$  t/d. This emission is about 11% of that emitted from the mining fleet of the facility, which at  $0.9 \pm 0.1$  t/d is a minor fraction of the aggregate  $aE$  itself. For completeness, this on-road traffic VOC emission was added to the mining fleet emissions, so that  $E_{mt} = 1.0 \pm 0.1$  t/d. This  $E_{mt}$  value is subtracted from the aggregated VOC emissions ( $aE - E_{mt}$ ) for the comparison with the reports to NPRI (see main text).

A similar analysis is carried out for the SUN facility, where a section of 13 km of Hwy 63 runs through the virtual flight box. Traffic emissions from this section are similarly estimated as above. The section of Hwy 63 in the box was divided into two parts (Ref 7). The first part, of 5 km length from Ruth Lake to Suncor Turnoff, is entirely within the flight box and has a VOC emission of 0.051 t/d (Table S4). The remaining 8 km part within the virtual flight box, starting from Suncor Turnoff, was part of a larger road section of 26 km from Suncor Turnoff to Fort Murray (indicated by yellow pins in Figure S1 below), for which the VOC emission was reported at 0.362 t/d (Table S4). Hence, the 8-km road part of the section would have a VOC emission of  $0.362 \times (8/26) = 0.11$  t/d within the virtual flight box. The total on-road VOC emissions from the two road sections (5 km + 8 km) within the box are then determined to be  $0.051 + 0.11 = 0.16$  t/d. Compared to the mining fleet emission (estimated  $3.4 \pm 0.6$  t/d) for SUN, the on-road traffic VOC emissions from Hwy 63 are very small (<5%). More importantly, they are only 0.3% of  $aE$ .

Nonetheless, the on-road traffic VOC emissions are added to the mining fleet emissions, so that  $E_{mt} = 3.6 \pm 0.6$  t/d, and then subtracted from the aggregate VOC emissions ( $aE - E_{mt}$ ) for comparison with reports to NPRI (see main text).

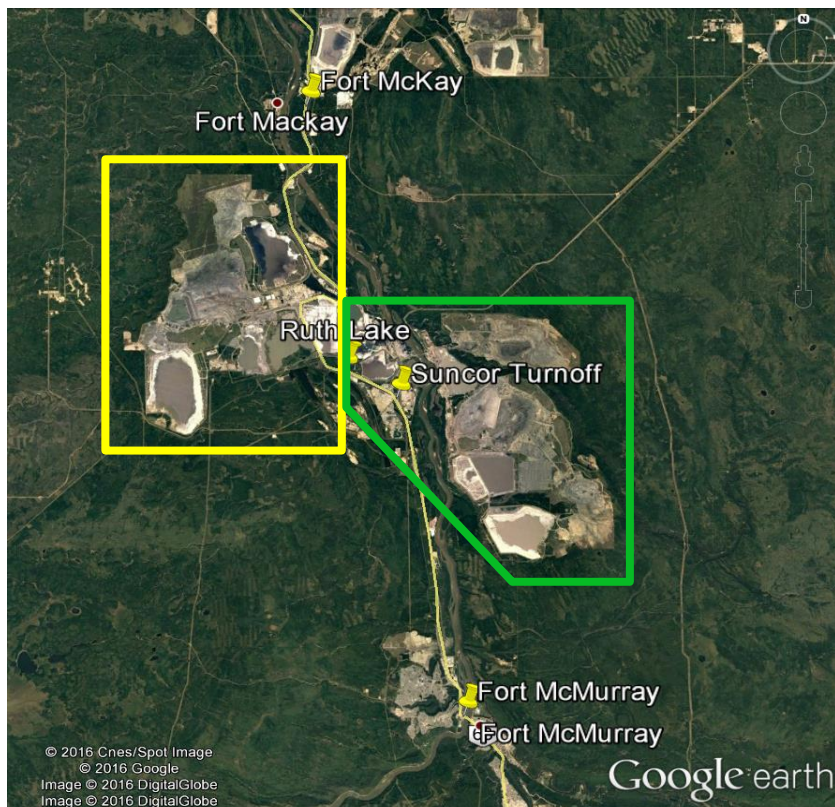

Figure S3. Segments of Highway 63 and virtual flight boxes for SML (yellow) and SUN (green) facilities. Yellow pins are the starting and ending points of each road segment as given in Table S4 below.

Table S4. Segments of Highways 63 entirely or partially within the virtual SML and SUN flight boxes (Ref 7).

| Highway 63 Segment          | Starting Point |          | Ending Point |          | Length (km) | VOC Emission (t/d) |
|-----------------------------|----------------|----------|--------------|----------|-------------|--------------------|
|                             | LAT            | LON      | LAT          | LON      |             |                    |
| Fort McKay to Ruth Lake     | 57.184         | -111.637 | 56.989       | -111.551 | 22          | 0.135              |
| Ruth Lake to Suncor turnoff | 56.989         | -111.551 | 56.969       | -111.486 | 5           | 0.051              |



|                                 |        |          |        |          |    |       |
|---------------------------------|--------|----------|--------|----------|----|-------|
| Suncor turnoff to Fort McMurray | 56.969 | -111.486 | 56.735 | -111.406 | 26 | 0.362 |
|---------------------------------|--------|----------|--------|----------|----|-------|

### **S7. Results of Emission Rates of Individual VOC Compounds for Four Oil Sands Surface Mining Facilities**

The percentage contributions from the top 60 VOC compounds to the aggregate emission rate of all VOC compounds **aE** are plotted here for each of the four facilities. The list of compounds is comprised of alkanes, alkenes, and aromatics from the canisters and aromatics and OVOCs from the PTRMS. The canister VOC results are derived from the emission ratios of compounds to tracers from the PTRMS, whereas the emission rates of the OVOCs from the PTRMS are derived from the TERRA algorithm, as shown in *Methods*.

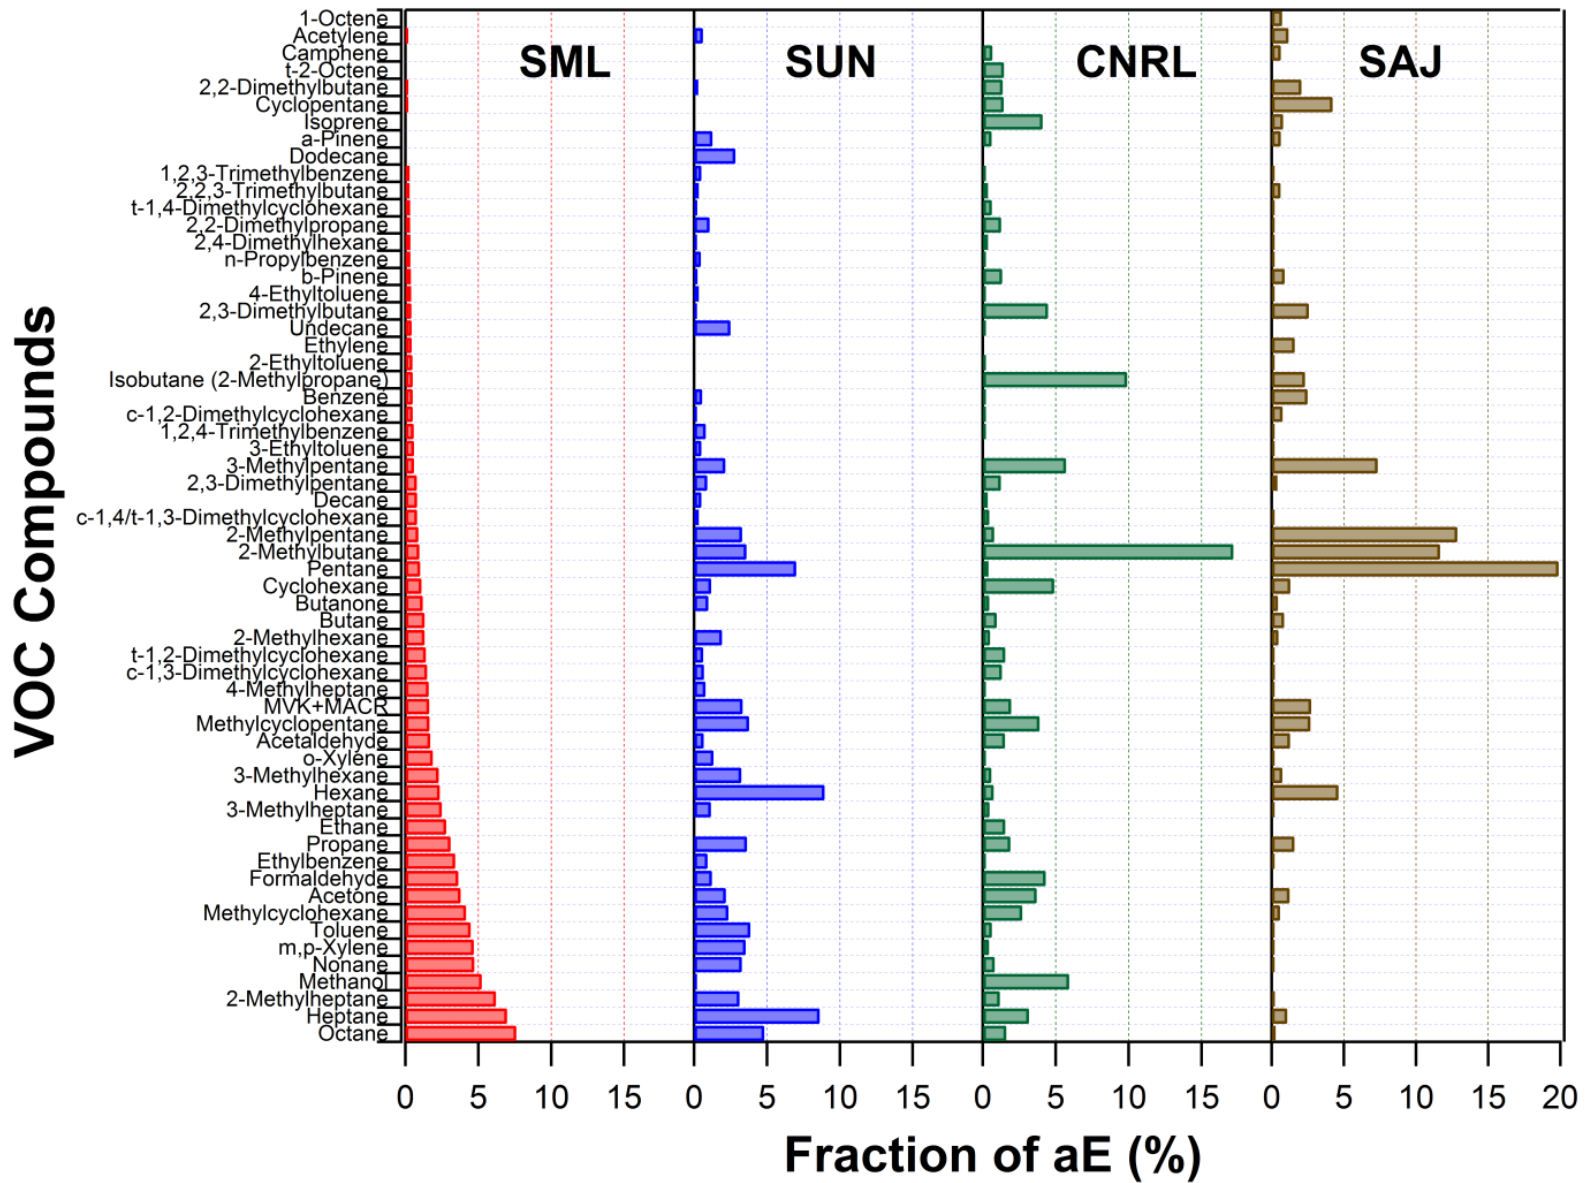

Figure S4. The mass fractions of the top 60 VOC species in aE, accounting for 97%, 96%, 99.5%, and 95% of aE at the four facilities, respectively.

## S8. Species Emission Reports to NPRI and Observed Species Emission Rates

Table S5. The reported emission rate of individual species in the NPRI Part 1 (Ref 4) compared to the observed rates derived from upscaling the results in Table S3 after correction for seasonal variations. Note that mining fleet contributions were subtracted from the results in Table S3 by assuming the same fraction of mining fleet contribution as in total VOC emissions. The upscaling also takes into account the seasonal changes. NQ – not quantified. NM – not measured.

| NPRI Part 1 Reported Species 2013  | Formula | NPRI Species Emission<br>tonnes/year | Observed Species Emission<br>tonnes/year | Observed/<br>NPRI Report<br>Ratio |
|------------------------------------|---------|--------------------------------------|------------------------------------------|-----------------------------------|
| <b>SML Reported Part 1 Species</b> |         |                                      |                                          |                                   |
| Isoprene                           | C5H8    | 0.2                                  | NQ                                       |                                   |
| Cumene<br>(i-propylbenzene)        | C9H12   | 8.8                                  | NQ                                       |                                   |
| Ethene                             | C2H4    | 60.9                                 | 58.9                                     | 1.0                               |
| Propene                            | C3H6    | 65.6                                 | 36.4                                     | 0.6                               |
| 1,3-Butadiene                      | C4H6    | 1.3                                  | 2.2                                      | 1.6                               |
| Benzene                            | C6H6    | 33.7                                 | 64.3                                     | 1.9                               |
| Cyclohexane                        | C6H12   | 91.4                                 | 146.6                                    | 1.6                               |
| n-Hexane                           | C6H14   | 121.1                                | 311.6                                    | 2.6                               |
| Toluene                            | C7H8    | 136.4                                | 594.7                                    | 4.4                               |
| Styrene                            | C8H8    | 0.3                                  | 2.9                                      | 9.0                               |
| Xylene isomers<br>1,2,4-           | C8H10   | 275.3                                | 959                                      | 3.5                               |
| Trimethylbenzene                   | C9H12   | 28.6                                 | 93.1                                     | 3.3                               |
| Ethylbenzene                       | C8H10   | 47.6                                 | 456.7                                    | 9.6                               |
| Naphthalene                        | C10H8   | 0.3                                  | 11.1                                     | 42.5                              |
| <b>Average Ratio</b>               |         |                                      |                                          | <b>6.8</b>                        |
| <b>Standard Deviation in Ratio</b> |         |                                      |                                          | <b>11.6</b>                       |
| <b>Median Ratio</b>                |         |                                      |                                          | <b>2.9</b>                        |
| <b>Lower Quartile of Ratios</b>    |         |                                      |                                          | <b>1.6</b>                        |

| Upper Quartile of Ratios            |       |       |        | 5.5         |
|-------------------------------------|-------|-------|--------|-------------|
| <b>SUN Reported Part 1 Species</b>  |       |       |        |             |
| Ethene                              | C2H4  | 81.2  | NQ     |             |
| Propene                             | C3H6  | 6.5   | NQ     |             |
| Methanol                            | CH3O  | 6.1   | NQ     |             |
| Isopropyl alcohol                   | C3H8O | 0.9   | NM     |             |
| Benzene                             | C6H6  | 13.6  | 66.4   | 4.9         |
| Cyclohexane                         | C6H12 | 87.0  | 151.4  | 1.7         |
| n-Hexane                            | C6H14 | 164.0 | 1135   | 6.9         |
| Toluene                             | C7H8  | 144.0 | 489.5  | 3.4         |
| Xylene (all isomers)                | C8H10 | 175.1 | 810.2  | 4.6         |
| Ethylbenzene                        | C8H10 | 36.4  | 118.8  | 3.3         |
| 1,2,4-Trimethylbenzene              | C9H12 | 38.8  | 130.0  | 3.4         |
| Naphthalene                         | C10H8 | 0.6   | 52.7   | 93.7        |
| <b>Average Ratio</b>                |       |       |        | <b>15.2</b> |
| <b>Standard Deviation in Ratio</b>  |       |       |        | <b>31.8</b> |
| <b>Median Ratio</b>                 |       |       |        | <b>4.0</b>  |
| <b>Lower Quartile of Ratios</b>     |       |       |        | <b>3.3</b>  |
| <b>Upper Quartile of Ratios</b>     |       |       |        | <b>5.4</b>  |
| <b>CNRL Reported Part 1 Species</b> |       |       |        |             |
| Formaldehyde                        | CH2O  | 21.2  | NQ     |             |
| 1,2,4-Trimethylbenzene              | C9H12 | 10.1  | NQ     |             |
| Benzene                             | C6H6  | 7.1   | 5.5    | 0.8         |
| Cyclohexane                         | C6H12 | 223.7 | 1071.9 | 4.8         |
| n-Hexane                            | C6H14 | 41.7  | 211.5  | 5.1         |
| Toluene                             | C7H8  | 21.8  | 170.3  | 7.8         |
| Xylene isomers                      | C8H10 | 40.6  | 119.0  | 2.9         |
| Ethylbenzene                        | C8H10 | 8.3   | 47.6   | 5.7         |
| <b>Average Ratio</b>                |       |       |        | <b>4.5</b>  |
| <b>Standard Deviation in Ratio</b>  |       |       |        | <b>2.4</b>  |
| <b>Median Ratio</b>                 |       |       |        | <b>4.9</b>  |
| <b>Lower Quartile of Ratios</b>     |       |       |        | <b>3.4</b>  |
| <b>Upper Quartile of Ratios</b>     |       |       |        | <b>5.6</b>  |

| SAJ Reported Part 1 Species |       |       |       |      |
|-----------------------------|-------|-------|-------|------|
| n-Hexane                    | C6H14 | 280.8 | 480.9 | 1.7  |
| Benzene                     | C6H6  | 3.6   | 253.8 | 69.9 |
| Average Ratio               |       |       |       | 35.8 |

Table S6. The reported emission rate of individual species in the NPRI Part 5 (Ref 4) compared to the observed rates derived from upscaling the results in Table S3 after taking into account seasonal variations. Note that mining fleet contributions were subtracted from the results in Table S3 by assuming the same fraction of mining fleet contribution as in total VOC emissions. The upscaling also takes into account the seasonal changes. NQ – not quantified. NM – not measured.

| NPRI Part 5 Reported Species 2013  | Formula | NPRI Species Emission<br>tonnes/year | Observed Species Emission<br>tonnes/year | Observed/<br>NPRI Report<br>Ratio |
|------------------------------------|---------|--------------------------------------|------------------------------------------|-----------------------------------|
| <b>SML Reported Part 5 Species</b> |         |                                      |                                          |                                   |
| Cyclohexene + isomers              | C6H10   | 0.03                                 | NQ                                       |                                   |
| Tetrahydrofuran                    | C4H8O   | 0.45                                 | NM                                       |                                   |
| Ethyne                             | C2H2    | 1.91                                 | 15.6                                     | 8.2                               |
| Ethene                             | C2H4    | 37.03                                | 58.9                                     | 1.6                               |
| Propene                            | C3H6    | 25.11                                | 36.4                                     | 1.4                               |
| Propane                            | C3H8    | 30.26                                | 396.2                                    | 13.1                              |
| 1,3-Butadiene                      | C4H6    | 0.49                                 | 2.2                                      | 4.5                               |
| Butene + isomers                   | C4H8    | 5.60                                 | 38.8                                     | 6.9                               |
| Butane + isomers                   | C4H10   | 27.58                                | 131.1                                    | 4.8                               |
| Pentene + isomers                  | C5H10   | 0.29                                 | 23.4                                     | 80.5                              |
| Pentane + isomers                  | C5H12   | 3.25                                 | 297.4                                    | 91.6                              |
| Benzene                            | C6H6    | 4.17                                 | 64.3                                     | 15.4                              |
| Hexene + isomers                   | C6H12   | 0.08                                 | 248.0                                    | 3100                              |
| n-Hexane                           | C6H14   | 0.15                                 | 311.6                                    | 2023                              |
| Hexane isomers                     | C6H14   | 0.02                                 | 269.5                                    | 12251                             |
| Toluene                            | C7H8    | 1.58                                 | 594.7                                    | 375                               |
| Cycloheptane + isomers             | C7H14   | 0.05                                 | 586.2                                    | 12744                             |
| Heptane + isomers                  | C7H16   | 0.06                                 | 1590                                     | 27891                             |
| Styrene                            | C8H8    | 0.07                                 | 2.9                                      | 40.0                              |
| Xylene isomers                     | C8H10   | 0.73                                 | 959                                      | 1306                              |
| Cyclooctane + isomers              | C8H16   | 0.05                                 | 636.4                                    | 12728                             |

|                                    |        |       |       |             |
|------------------------------------|--------|-------|-------|-------------|
| 1,2,4-Trimethylbenzene             | C9H12  | 0.10  | 93.1  | 895         |
| Trimethylbenzene isomers           | C9H12  | 0.12  | 459.7 | 3863        |
| Nonane + isomers                   | C9H20  | 0.07  | 649.3 | 9411        |
| Decane and isomers                 | C10H22 | 0.03  | 141.4 | 5238        |
| <b>Average Ratio</b>               |        |       |       | <b>4004</b> |
| <b>Standard Deviation in Ratio</b> |        |       |       | <b>6846</b> |
| <b>Median Ratio</b>                |        |       |       | <b>375</b>  |
| <b>Lower Quartile of Ratios</b>    |        |       |       | <b>11</b>   |
| <b>Upper Quartile of Ratios</b>    |        |       |       | <b>4550</b> |
| <b>SUN Reported Part 5 Species</b> |        |       |       |             |
| Ethene                             | C2H4   | 106.5 | NQ    |             |
| Propene                            | C3H6   | 6.5   | NQ    |             |
| Butene + isomers                   | C4H8   | 51.7  | NQ    |             |
| Butane + isomers                   | C4H10  | 332.2 | NQ    |             |
| Pentene + isomers                  | C5H10  | 36.4  | NQ    |             |
| Methylindan + isomers              | C10H12 | 1.3   | NM    |             |
| Methanol                           | CH3O   | 6.1   | NQ    |             |
| Methyl isobutyl ketone             | C6H12O | 2.3   | NM    |             |
| Ethyne                             | C2H2   | 33.4  | 72.5  | 2.2         |
| Propane                            | C3H8   | 227.2 | 443.1 | 2.0         |
| Pentane + isomers                  | C5H12  | 231.3 | 1453  | 6.3         |
| Benzene                            | C6H6   | 13.6  | 66.4  | 4.9         |
| Cyclohexene + isomers              | C6H10  | 2.4   | 15.2  | 6.3         |
| Hexene + isomers                   | C6H12  | 77.1  | 667.2 | 8.7         |
| n-Hexane                           | C6H14  | 186.6 | 1135  | 6.1         |
| Hexane isomers                     | C6H14  | 181.1 | 740.4 | 4.1         |
| Toluene                            | C7H8   | 144.0 | 489.5 | 3.4         |
| Cycloheptane + isomers             | C7H14  | 126.3 | 364.6 | 2.9         |
| Heptane + isomers                  | C7H16  | 335.4 | 1958  | 5.8         |
| Xylene isomers                     | C8H10  | 175.1 | 691.4 | 3.9         |
| Cyclooctane + isomers              | C8H16  | 72.4  | 267.6 | 3.7         |
| Octane + isomers                   | C8H18  | 254.6 | 1336  | 5.2         |
| 1,2,4-Trimethylbenzene             | C9H12  | 38.8  | 130.0 | 3.4         |
| Trimethylbenzene isomers           | C9H12  | 39.9  | 456.8 | 11.4        |
| Nonane + isomers                   | C9H20  | 120.7 | 433.8 | 3.6         |

|                                     |        |        |       |             |
|-------------------------------------|--------|--------|-------|-------------|
| Decane + isomers                    | C10H22 | 95.9   | 81.1  | 0.8         |
| Dodecane + isomers                  | C12H26 | 14.5   | 389.6 | 26.8        |
| Formaldehyde                        | CH2O   | 6.9    | 178.6 | 26.0        |
| <b>Average Ratio</b>                |        |        |       | <b>6.9</b>  |
| <b>Standard Deviation in Ratio</b>  |        |        |       | <b>7.1</b>  |
| <b>Median Ratio</b>                 |        |        |       | <b>4.5</b>  |
| <b>Lower Quartile of Ratios</b>     |        |        |       | <b>3.4</b>  |
| <b>Upper Quartile of Ratios</b>     |        |        |       | <b>6.3</b>  |
| <b>CNRL Reported Part 5 Species</b> |        |        |       |             |
| Propene                             | C3H6   | 10.7   | NQ    |             |
| 1,3-Butadiene                       | C4H6   | 3.4    | NQ    |             |
| 1,2,4-Trimethylbenzene              | C9H12  | 10.1   | NQ    |             |
| Formaldehyde                        | CH2O   | 30.8   | NQ    |             |
| Propane                             | C3H8   | 156.7  | 467.8 | 3.0         |
| Butane + isomers                    | C4H10  | 37.3   | 2237  | 60.0        |
| Pentane + isomers                   | C5H12  | 17.5   | 4109  | 234.6       |
| Benzene                             | C6H6   | 7.1    | 5.5   | 0.8         |
| n-Hexane                            | C6H14  | 41.7   | 211.5 | 5.1         |
| Hexane isomers                      | C6H14  | 19.7   | 1598  | 81.0        |
| Toluene                             | C7H8   | 21.8   | 170.3 | 7.8         |
| Heptane + isomers                   | C7H16  | 22.5   | 1639  | 72.8        |
| Xylene isomers                      | C8H10  | 40.6   | 119.0 | 2.9         |
| Octane + isomers                    | C8H18  | 16.8   | 1056  | 62.8        |
| <b>Average Ratio</b>                |        |        |       | <b>58.6</b> |
| <b>Standard Deviation in Ratio</b>  |        |        |       | <b>73.8</b> |
| <b>Median Ratio</b>                 |        |        |       | <b>60.0</b> |
| <b>Lower Quartile of Ratios</b>     |        |        |       | <b>5.1</b>  |
| <b>Upper Quartile of Ratios</b>     |        |        |       | <b>72.8</b> |
| <b>SAJ Reported Part 5 Species</b>  |        |        |       |             |
| Butene + isomers                    | C4H8   | 211.6  | 52.2  | 0.3         |
| Pentane + isomers                   | C5H12  | 1982.8 | 3261  | 1.6         |
| Benzene                             | C6H6   | 3.6    | 253.8 | 69.9        |
| Cyclohexene + isomers               | C6H10  | 1.2    | 26.2  | 22.4        |
| Hexene + isomers                    | C6H12  | 3.1    | 441.6 | 141.0       |
| n-Hexane                            | C6H14  | 280.8  | 480.9 | 1.7         |
| <b>Average Ratio</b>                |        |        |       | <b>39.5</b> |

|                                    |             |
|------------------------------------|-------------|
| <b>Standard Deviation in Ratio</b> | <b>56.4</b> |
| <b>Median Ratio</b>                | <b>12.0</b> |
| <b>Lower Quartile of Ratios</b>    | <b>1.7</b>  |
| <b>Upper Quartile of Ratios</b>    | <b>58.0</b> |

### S9. Summary of VOC Measurements Made in Flights over the SML Facility

Measurement statistics for VOC mixing ratios for emission flights over the SML facility as determined from both PTRMS measurements and the canister sampling/GC analysis. Similar results can be obtained from results for flights over the SUN, CNRL, and SAJ facilities but are not tabulated here. Detailed results are published in the Joint Oil Sands Monitoring data portal (<http://jointoilsandsmonitoring.ca/default.asp?lang=En&n=A743E65D-1>).

Table S7. VOC compounds measured with the PTRMS instrument. Air mixing ratio statistics are listed for the SML facility only. Corresponding statistics for air mixing ratio data from the SUN, CNRL, and SAJ facilities can be derived from the original data published in the Joint Oil Sands Monitoring data portal (<http://jointoilsandsmonitoring.ca/default.asp?lang=En&n=A743E65D-1>). The detection limits, precisions, and accuracies for the compounds are the same for the SUN, CNRL, and SAJ facilities. BDL = below detection limit.

| Compound Formula                                              | Detection Limit | Precision | Accuracy | SML  |       |       |      |                 |                 |
|---------------------------------------------------------------|-----------------|-----------|----------|------|-------|-------|------|-----------------|-----------------|
|                                                               | pptv            |           |          | %    | %     | Mean  | Max  | 90th percentile | 80th percentile |
| <b>Response factors determined from calibration standards</b> |                 |           |          |      |       |       |      |                 |                 |
| C <sub>2</sub> H <sub>3</sub> N                               | 130             | 3         | 6        | 140  | 680   | 300   | 240  | 140             | BDL             |
| CH <sub>4</sub> O                                             | 640             | 3         | 8        | 7700 | 16000 | 10400 | 9700 | 8400            | BDL             |
| C <sub>2</sub> H <sub>4</sub> O                               | 500             | 3         | 5        | 660  | 3500  | 1340  | 1070 | 590             | BDL             |
| C <sub>3</sub> H <sub>4</sub> O                               | 210             | 3         | 5        | 94   | 680   | 280   | 210  | 79              | BDL             |
| C <sub>3</sub> H <sub>6</sub> O                               | 320             | 3         | 5        | 2900 | 5700  | 4000  | 3700 | 3100            | BDL             |
| C <sub>4</sub> H <sub>6</sub> O                               | 140             | 3         | 6        | 650  | 1900  | 1200  | 1050 | 690             | BDL             |
| C <sub>4</sub> H <sub>8</sub> O                               | 130             | 3         | 5        | 310  | 1100  | 560   | 470  | 310             | BDL             |
| C <sub>5</sub> H <sub>8</sub>                                 | 270             | 3         | 5        | 1200 | 8300  | 2900  | 2200 | 860             | BDL             |
| C <sub>6</sub> H <sub>6</sub>                                 | 84              | 3         | 5        | 83   | 1700  | 200   | 130  | 51              | BDL             |
| C <sub>7</sub> H <sub>8</sub>                                 | 79              | 3         | 5        | 130  | 3500  | 325   | 150  | 38              | BDL             |



|                                                                                         |     |   |    |     |      |     |     |     |     |
|-----------------------------------------------------------------------------------------|-----|---|----|-----|------|-----|-----|-----|-----|
| C <sub>8</sub> H <sub>10</sub>                                                          | 69  | 3 | 6  | 130 | 5300 | 310 | 89  | 4.7 | BDL |
| C <sub>10</sub> H <sub>16</sub>                                                         | 90  | 3 | 5  | 290 | 1600 | 740 | 560 | 200 | BDL |
| <b>Response factors determined from proton transfer reaction kinetic rate constants</b> |     |   |    |     |      |     |     |     |     |
| C <sub>6</sub> H <sub>10</sub>                                                          | 96  | 3 | 20 | 220 | 3400 | 590 | 340 | 90  | BDL |
| C <sub>6</sub> H <sub>12</sub>                                                          | 55  | 3 | 20 | 31  | 840  | 116 | 67  | 11  | BDL |
| C <sub>7</sub> H <sub>14</sub>                                                          | 71  | 3 | 20 | 3.2 | 200  | 37  | 20  | BDL | BDL |
| C <sub>8</sub> H <sub>8</sub>                                                           | 130 | 3 | 20 | 25  | 425  | 88  | 59  | 12  | BDL |
| C <sub>8</sub> H <sub>16</sub>                                                          | 130 | 3 | 20 | 2.5 | 130  | 27  | 17  | BDL | BDL |
| C <sub>9</sub> H <sub>10</sub>                                                          | 120 | 3 | 20 | 20  | 300  | 79  | 50  | 6.9 | BDL |
| C <sub>9</sub> H <sub>12</sub>                                                          | 72  | 3 | 20 | 67  | 1900 | 320 | 210 | BDL | BDL |
| C <sub>10</sub> H <sub>14</sub>                                                         | 45  | 3 | 20 | 32  | 610  | 180 | 110 | 1.5 | BDL |

Table S8. Canister sample VOC compound concentration statistics for the SML facility. Empty entries for species indicate that there were no emission rates determined for those species. NR = not reported, BDL = below detection limit. Reported uncertainties from this method are 30% for concentrations below 0.02  $\mu\text{g m}^{-3}$ , 20% for 0.02  $\mu\text{g m}^{-3}$  to 0.2  $\mu\text{g m}^{-3}$ , and 10% above 0.2  $\mu\text{g m}^{-3}$  (Ref 10). These detection limits were converted to mixing ratios presented below using the ambient temperature and pressure encountered during the airborne measurements.

For each VOC species determined in the canister samples, correlations with a tracer were investigated, and the tracer with the highest correlation coefficient  $R^2$  was chosen for a particular VOC species in the canisters to determine the regression slope ( $b \pm \Delta b$ ) and further to determine their emission ratios after correction for oxidation losses.  $\Delta b$  is the standard deviation on  $b$ , from which the standard error  $\delta_b$  is calculated for further uncertainty propagation analyses. See main article for the details. In this table, a list of 12 tracers were used for the VOCs species from the canisters, including 10 tracers measured with the PTRMS instrument and CO/CH<sub>4</sub> from a concurrent continuous cavity ring down spectroscopy instrument (Picarro Model G2401) also on board the aircraft (Ref. 11). Empty cells in the correlation table indicate that no emission rates could be determined from this emission ratio approach.

In addition to the listed compounds in this table, laboratory analyses of the canister samples also targeted an additional 72 VOC compounds. These compounds were observed in canisters collected in the plumes from the facility but their concentrations were low. The emission ratio approach was not suitable to determine their emission rates from the facility.

| Compound Name | Formula | Detection limit | Precision (n=46) | SML (n = 106) |                 |                 |        |     |      | Correlation with tracers to determine regression slope b |                |   |            |
|---------------|---------|-----------------|------------------|---------------|-----------------|-----------------|--------|-----|------|----------------------------------------------------------|----------------|---|------------|
|               |         |                 |                  | Max           | 90th percentile | 80th percentile | Median | Min | Mean | Tracer of Choice                                         | R <sup>2</sup> | b | $\Delta b$ |
| N-Alkanes     |         |                 |                  |               |                 |                 |        |     |      |                                                          |                |   |            |

|                             |                                 |     |              |       |      |      |      |     |      |                                 |       |        |        |
|-----------------------------|---------------------------------|-----|--------------|-------|------|------|------|-----|------|---------------------------------|-------|--------|--------|
| Ethane                      | C <sub>2</sub> H <sub>6</sub>   | 24  | Not Reported | 15000 | 4000 | 3700 | 2500 | 510 | 2600 | C <sub>6</sub> H <sub>6</sub>   | 0.924 | 4.02   | 0.53   |
| Propane                     | C <sub>3</sub> H <sub>8</sub>   | 50  | 13%          | 3300  | 2600 | 2300 | 1800 | 130 | 1500 | C <sub>6</sub> H <sub>6</sub>   | 0.830 | 3.09   | 0.66   |
| Butane                      | C <sub>4</sub> H <sub>10</sub>  | 11  | 11%          | 2700  | 1200 | 830  | 580  | 42  | 630  | CO                              | 0.915 | 0.025  | 0.0004 |
| Pentane                     | C <sub>5</sub> H <sub>12</sub>  | 10  | 11%          | 680   | 380  | 260  | 190  | 36  | 210  | C <sub>6</sub> H <sub>6</sub>   | 0.893 | 0.62   | 0.099  |
| Hexane                      | C <sub>6</sub> H <sub>14</sub>  | 12  | 15%          | 1500  | 450  | 270  | 88   | BDL | 190  | C <sub>7</sub> H <sub>8</sub>   | 0.984 | 0.56   | 0.073  |
| Heptane                     | C <sub>7</sub> H <sub>16</sub>  | 9.9 | 19%          | 4100  | 960  | 550  | 88   | BDL | 330  | C <sub>7</sub> H <sub>8</sub>   | 0.988 | 1.43   | 0.16   |
| Octane                      | C <sub>8</sub> H <sub>18</sub>  | 3.8 | 20%          | 5500  | 840  | 400  | 32   | BDL | 310  | C <sub>8</sub> H <sub>10</sub>  | 0.987 | 1.22   | 0.22   |
| Nonane                      | C <sub>9</sub> H <sub>20</sub>  | 4.7 | 23%          | 2600  | 450  | 220  | 24   | BDL | 150  | C <sub>9</sub> H <sub>12</sub>  | 0.996 | 1.89   | 0.060  |
| Decane                      | C <sub>10</sub> H <sub>22</sub> | 4.5 | 26%          | 410   | 130  | 63   | 20   | BDL | 44   | C <sub>9</sub> H <sub>12</sub>  | 0.996 | 0.29   | 0.0096 |
| Undecane                    | C <sub>11</sub> H <sub>24</sub> | 3.3 | 25%          | 180   | 78   | 46   | 18   | BDL | 31   | C <sub>10</sub> H <sub>14</sub> | 0.973 | 0.44   | 0.0096 |
| Dodecane                    | C <sub>12</sub> H <sub>26</sub> | 4.1 | 22%          | 330   | 92   | 65   | 26   | BDL | 41   |                                 |       |        |        |
| <b>Branched Alkanes</b>     |                                 |     |              |       |      |      |      |     |      |                                 |       |        |        |
| Isobutane (2-Methylpropane) | C <sub>4</sub> H <sub>10</sub>  | 10  | 8.7%         | 970   | 480  | 360  | 260  | 15  | 250  | CO                              | 0.936 | 0.0095 | 0.0001 |
| 2-Methylbutane              | C <sub>5</sub> H <sub>12</sub>  | 12  | 8.9%         | 650   | 380  | 320  | 190  | 31  | 210  | C <sub>6</sub> H <sub>6</sub>   | 0.883 | 0.58   | 0.098  |
| 2,2-Dimethylpropane         | C <sub>5</sub> H <sub>12</sub>  | 3.7 | 17%          | 370   | 120  | 78   | 26   | BDL | 51   | C <sub>6</sub> H <sub>10</sub>  | 0.869 | 0.085  | 0.032  |
| 2-Methylpentane             | C <sub>6</sub> H <sub>14</sub>  | 17  | 15%          | 560   | 200  | 120  | 59   | BDL | 90   | C <sub>7</sub> H <sub>8</sub>   | 0.985 | 0.21   | 0.027  |
| 3-Methylpentane             | C <sub>6</sub> H <sub>14</sub>  | 11  | 12%          | 390   | 130  | 78   | 38   | BDL | 57   | C <sub>7</sub> H <sub>8</sub>   | 0.990 | 0.14   | 0.015  |
| 2,2-Dimethylbutane          | C <sub>6</sub> H <sub>14</sub>  | 13  | 5.7%         | 110   | 48   | 28   | BDL  | BDL | 19   | C <sub>6</sub> H <sub>10</sub>  | 0.951 | 0.035  | 0.0076 |
| 2,3-Dimethylbutane          | C <sub>6</sub> H <sub>14</sub>  | 4.3 | 26%          | 210   | 75   | 48   | 20   | BDL | 31   | C <sub>6</sub> H <sub>10</sub>  | 0.965 | 0.070  | 0.013  |
| 2-Methylhexane              | C <sub>7</sub> H <sub>16</sub>  | 4.4 | 19%          | 760   | 200  | 110  | 29   | BDL | 72   | C <sub>7</sub> H <sub>8</sub>   | 0.989 | 0.27   | 0.029  |
| 3-Methylhexane              | C <sub>7</sub> H <sub>16</sub>  | 3.7 | 16%          | 1300  | 350  | 200  | 43   | BDL | 120  | C <sub>7</sub> H <sub>8</sub>   | 0.990 | 0.47   | 0.049  |
| 2,2-Dimethylpentane         | C <sub>7</sub> H <sub>16</sub>  | 11  | 7.8%         | 25    | BDL  | BDL  | BDL  | BDL | BDL  | C <sub>6</sub> H <sub>10</sub>  | 0.954 | 0.0085 | 0.0018 |
| 2,3-Dimethylpentane         | C <sub>7</sub> H <sub>16</sub>  | 5.9 | 14%          | 480   | 120  | 77   | 27   | BDL | 50   | C <sub>7</sub> H <sub>8</sub>   | 0.987 | 0.16   | 0.019  |
| 2,4-Dimethylpentane         | C <sub>7</sub> H <sub>16</sub>  | 4.5 | 7.5%         | 82    | 29   | 17   | 8    | BDL | 12   | C <sub>6</sub> H <sub>12</sub>  | 0.988 | 0.13   | 0.003  |
| 2,2,3-Trimethylbutane       | C <sub>7</sub> H <sub>16</sub>  | 5.0 | 17%          | 120   | 37   | 22   | 7.8  | BDL | 15   | C <sub>6</sub> H <sub>10</sub>  | 0.975 | 0.040  | 0.0062 |
| 2-Methylheptane             | C <sub>8</sub> H <sub>18</sub>  | 4.2 | 29%          | 3200  | 540  | 290  | 28   | BDL | 200  | C <sub>7</sub> H <sub>8</sub>   | 0.991 | 1.12   | 0.11   |
| 3-Methylheptane             | C <sub>8</sub> H <sub>18</sub>  | 3.6 | 25%          | 1300  | 200  | 110  | 9.4  | BDL | 76   | C <sub>7</sub> H <sub>8</sub>   | 0.990 | 0.45   | 0.048  |
| 4-Methylheptane             | C <sub>8</sub> H <sub>18</sub>  | 3.8 | 23%          | 820   | 140  | 76   | 12   | BDL | 54   | C <sub>7</sub> H <sub>8</sub>   | 0.989 | 0.29   | 0.032  |

|                                 |                                 |     |      |      |     |     |     |     |     |                                |       |        |        |
|---------------------------------|---------------------------------|-----|------|------|-----|-----|-----|-----|-----|--------------------------------|-------|--------|--------|
| 2,4-Dimethylhexane              | C <sub>8</sub> H <sub>18</sub>  | 4.2 | 33%  | 180  | 33  | 19  | BDL | BDL | 13  | C <sub>7</sub> H <sub>8</sub>  | 0.988 | 0.060  | 0.0073 |
| 2,5-Dimethylhexane              | C <sub>8</sub> H <sub>18</sub>  | 3.4 | 7.6% | 130  | 26  | 16  | 3.6 | BDL | 10  | C <sub>7</sub> H <sub>8</sub>  | 0.988 | 0.047  | 0.0052 |
| 2,3,4-Trimethylpentane          | C <sub>8</sub> H <sub>18</sub>  | 3.3 | 8.7% | 110  | 21  | 13  | 3.5 | BDL | 8.7 | C <sub>6</sub> H <sub>12</sub> | 0.990 | 0.17   | 0.0036 |
| 2,2,5-Trimethylhexane           | C <sub>9</sub> H <sub>20</sub>  | 2.3 | BDL  | 10   | BDL | BDL | BDL | BDL | BDL |                                |       |        |        |
| 3,6-Dimethyloctane              | C <sub>10</sub> H <sub>22</sub> | 2.9 | 14%  | 56   | 10  | 5.4 | BDL | BDL | 3.4 | C <sub>7</sub> H <sub>8</sub>  | 0.827 | 0.018  | 0.0088 |
| <b>Cycloalkanes</b>             |                                 |     |      |      |     |     |     |     |     |                                |       |        |        |
| Cyclopentane                    | C <sub>5</sub> H <sub>10</sub>  | 4.1 | 18%  | 160  | 61  | 32  | 17  | BDL | 26  | C <sub>8</sub> H <sub>10</sub> | 0.959 | 0.0035 | 0      |
| Methylcyclopentane              | C <sub>6</sub> H <sub>12</sub>  | 4.7 | 14%  | 1100 | 300 | 160 | 53  | BDL | 110 | C <sub>7</sub> H <sub>8</sub>  | 0.987 | 0.40   | 0.047  |
| Cyclohexane                     | C <sub>6</sub> H <sub>12</sub>  | 5.5 | 13%  | 760  | 170 | 90  | 27  | BDL | 66  | C <sub>7</sub> H <sub>8</sub>  | 0.989 | 0.27   | 0.029  |
| Methylcyclohexane               | C <sub>7</sub> H <sub>14</sub>  | 4.2 | 15%  | 2500 | 460 | 270 | 43  | BDL | 180 | C <sub>7</sub> H <sub>8</sub>  | 0.991 | 0.87   | 0.085  |
| c-1,3-Dimethylcyclohexane       | C <sub>8</sub> H <sub>16</sub>  | 3.0 | 18%  | 1100 | 160 | 90  | 12  | BDL | 65  |                                |       |        |        |
| t-1,2-Dimethylcyclohexane       | C <sub>8</sub> H <sub>16</sub>  | 3.3 | 17%  | 770  | 110 | 61  | 9.6 | BDL | 46  |                                |       |        |        |
| c-1,4/t-1,3-Dimethylcyclohexane | C <sub>8</sub> H <sub>16</sub>  | 4.4 | 19%  | 590  | 82  | 48  | 6.6 | BDL | 35  | C <sub>8</sub> H <sub>10</sub> | 0.988 | 0.13   | 0.023  |
| t-1,4-Dimethylcyclohexane       | C <sub>8</sub> H <sub>16</sub>  | 4.2 | 9.9% | 230  | 37  | 20  | BDL | BDL | 15  | C <sub>8</sub> H <sub>10</sub> | 0.991 | 0.051  | 0.0079 |
| c-1,2-Dimethylcyclohexane       | C <sub>8</sub> H <sub>16</sub>  | 5.2 | 33%  | 260  | 30  | 17  | BDL | BDL | 13  | C <sub>6</sub> H <sub>12</sub> | 0.911 | 0.41   | 0.027  |
| <b>Aromatic Hydrocarbons</b>    |                                 |     |      |      |     |     |     |     |     |                                |       |        |        |
| Benzene                         | C <sub>6</sub> H <sub>6</sub>   | 8.3 | 8.2% | 380  | 140 | 90  | 69  | 24  | 79  | C <sub>7</sub> H <sub>8</sub>  | 0.990 | 0.13   | 0.01   |
| Toluene                         | C <sub>7</sub> H <sub>8</sub>   | 25  | 19%  | 2800 | 650 | 350 | 89  | BDL | 230 | C <sub>7</sub> H <sub>8</sub>  | 0.991 | 1.0    | 0.1    |
| m,p-Xylene                      | C <sub>8</sub> H <sub>10</sub>  | 14  | 22%  | 3100 | 540 | 260 | 34  | BDL | 190 | C <sub>9</sub> H <sub>12</sub> | 0.994 | 2.3    | 0.09   |
| o-Xylene                        | C <sub>8</sub> H <sub>10</sub>  | 8.1 | 25%  | 1200 | 230 | 120 | 16  | BDL | 81  | C <sub>9</sub> H <sub>12</sub> | 0.993 | 0.90   | 0.038  |
| Ethylbenzene                    | C <sub>8</sub> H <sub>10</sub>  | 6.6 | 25%  | 1300 | 230 | 100 | 14  | BDL | 75  | C <sub>8</sub> H <sub>10</sub> | 0.989 | 0.29   | 0.049  |
| 1,2,3-Trimethylbenzene          | C <sub>9</sub> H <sub>12</sub>  | 6.1 | 7.2% | 130  | 42  | 20  | 7.4 | BDL | 16  | C <sub>7</sub> H <sub>8</sub>  | 0.977 | 0.047  | 0.0075 |
| 1,2,4-Trimethylbenzene          | C <sub>9</sub> H <sub>12</sub>  | 13  | 8.1% | 250  | 74  | 35  | 12  | BDL | 27  | C <sub>7</sub> H <sub>8</sub>  | 0.985 | 0.096  | 0.012  |
| 1,3,5-Trimethylbenzene          | C <sub>9</sub> H <sub>12</sub>  | 6.7 | 3.0% | 91   | 25  | 11  | BDL | BDL | 8.5 | C <sub>7</sub> H <sub>8</sub>  | 0.988 | 0.033  | 0.0039 |
| 2-Ethyltoluene                  | C <sub>9</sub> H <sub>12</sub>  | 6.7 | 7.3% | 220  | 51  | 27  | BDL | BDL | 19  | C <sub>7</sub> H <sub>8</sub>  | 0.992 | 0.082  | 0.0074 |
| 3-Ethyltoluene                  | C <sub>9</sub> H <sub>12</sub>  | 7.1 | 7.9% | 330  | 71  | 38  | 8.1 | BDL | 27  | C <sub>9</sub> H <sub>12</sub> | 0.992 | 0.25   | 0.011  |
| 4-Ethyltoluene                  | C <sub>9</sub> H <sub>12</sub>  | 5.4 | 8.4% | 170  | 42  | 22  | BDL | BDL | 15  | C <sub>7</sub> H <sub>8</sub>  | 0.992 | 0.066  | 0.0059 |

|                               |                                 |     |      |      |     |     |     |      |     |                                 |       |        |        |
|-------------------------------|---------------------------------|-----|------|------|-----|-----|-----|------|-----|---------------------------------|-------|--------|--------|
| n-Propylbenzene               | C <sub>9</sub> H <sub>12</sub>  | 6.4 | 7.9% | 160  | 35  | 18  | BDL | BDL  | 13  | C <sub>7</sub> H <sub>8</sub>   | 0.994 | 0.059  | 0.0049 |
| i-Propylbenzene               | C <sub>9</sub> H <sub>12</sub>  | 6.9 | 27%  | 300  | 33  | 17  | BDL | BDL  | 15  | C <sub>6</sub> H <sub>12</sub>  | 0.733 | 0.16   | 0.021  |
| n-Butylbenzene                | C <sub>10</sub> H <sub>14</sub> | 5.5 | 3.8% | 23   | 7.6 | BDL | BDL | BDL  | 3.0 | C <sub>8</sub> H <sub>10</sub>  | 0.987 | 0.0051 | 0.0009 |
| iso-Butylbenzene              | C <sub>10</sub> H <sub>14</sub> | 4.9 | BDL  | 7.9  | BDL | BDL | BDL | BDL  | BDL | C <sub>7</sub> H <sub>8</sub>   | 0.868 | 0.0027 | 0.0011 |
| sec-Butylbenzene              | C <sub>10</sub> H <sub>14</sub> | 5.3 | 2.7% | 19   | BDL | BDL | BDL | BDL  | 2.0 | C <sub>8</sub> H <sub>10</sub>  | 0.994 | 0.0044 | 0.0005 |
| tert-Butylbenzene             | C <sub>10</sub> H <sub>14</sub> | 6.3 | 15%  | BDL  | BDL | BDL | BDL | BDL  | BDL |                                 |       |        |        |
| 1,2-Diethylbenzene            | C <sub>10</sub> H <sub>14</sub> | 6.3 | BDL  | 15   | BDL | BDL | BDL | BDL  | 1.7 | C <sub>7</sub> H <sub>8</sub>   | 0.987 | 0.0052 | 0.0006 |
| 1,3-Diethylbenzene            | C <sub>10</sub> H <sub>14</sub> | 5.9 | 2.4% | 21   | BDL | BDL | BDL | BDL  | 2.0 | C <sub>7</sub> H <sub>8</sub>   | 0.988 | 0.0077 | 0.0009 |
| 1,4-Diethylbenzene            | C <sub>10</sub> H <sub>14</sub> | 8.7 | 2.0% | 57   | 18  | 13  | BDL | BDL  | 6.7 | C <sub>7</sub> H <sub>8</sub>   | 0.982 | 0.022  | 0.0030 |
| p-Cymene                      | C <sub>10</sub> H <sub>14</sub> | 5.9 | 23%  | 190  | 17  | 11  | BDL | BDL  | 9.1 | CH <sub>4</sub>                 | 0.985 | 3.1E-5 | 1.5E-6 |
| Hexylbenzene                  | C <sub>12</sub> H <sub>18</sub> | 3.8 | BDL  | 27   | 8.1 | 5.1 | BDL | BDL  | 3.3 |                                 |       |        |        |
| Styrene                       | C <sub>8</sub> H <sub>8</sub>   | 8.9 | 6.6% | 15   | BDL | BDL | BDL | 0.53 | BDL | C <sub>2</sub> H <sub>4</sub> O | 0.959 | 0.0033 | 0.0005 |
| Indane (2,3-Dihydroindene)    | C <sub>9</sub> H <sub>10</sub>  | 7.7 | 2.1% | 78   | 24  | 12  | BDL | BDL  | 9.0 | C <sub>7</sub> H <sub>8</sub>   | 0.981 | 0.030  | 0.0042 |
| Naphthalene                   | C <sub>10</sub> H <sub>8</sub>  | 9.4 | 35%  | 37   | 20  | 14  | BDL | BDL  | 10  | C <sub>10</sub> H <sub>14</sub> | 0.942 | 0.092  | 0.003  |
| <b>Straight Chain Alkenes</b> |                                 |     |      |      |     |     |     |      |     |                                 |       |        |        |
| Ethene                        | C <sub>2</sub> H <sub>4</sub>   | 17  | NR   | 1500 | 640 | 560 | 300 | 69   | 350 | C <sub>7</sub> H <sub>8</sub>   | 0.803 | 0.32   | 0.17   |
| Propene                       | C <sub>3</sub> H <sub>6</sub>   | 12  | 8.2% | 770  | 200 | 170 | 81  | 16   | 110 | C <sub>7</sub> H <sub>8</sub>   | 0.871 | 0.11   | 0.05   |
| 1-Butene/2-Methylpropene      | C <sub>4</sub> H <sub>8</sub>   | 16  | 9.0% | 240  | 94  | 80  | 40  | BDL  | 52  | C <sub>7</sub> H <sub>8</sub>   | 0.951 | 0.054  | 0.013  |
| c-2-Butene                    | C <sub>4</sub> H <sub>8</sub>   | 6.5 | 8.0% | 26   | 13  | 8.7 | BDL | BDL  | 5.5 | C <sub>7</sub> H <sub>8</sub>   | 0.871 | 0.0067 | 0.0027 |
| t-2-Butene                    | C <sub>4</sub> H <sub>8</sub>   | 6.0 | 10%  | 30   | 14  | 9.0 | BDL | BDL  | 5.3 | C <sub>7</sub> H <sub>8</sub>   | 0.794 | 0.0085 | 0.0047 |
| 1-Pentene                     | C <sub>5</sub> H <sub>10</sub>  | 20  | 7.3% | 61   | 27  | 22  | BDL | BDL  | 14  | C <sub>7</sub> H <sub>8</sub>   | 0.971 | 0.020  | 0.0035 |
| c-2-Pentene                   | C <sub>5</sub> H <sub>10</sub>  | 6.9 | BDL  | 9.1  | BDL | BDL | BDL | BDL  | BDL |                                 |       |        |        |
| t-2-Pentene                   | C <sub>5</sub> H <sub>10</sub>  | 4.6 | 12%  | 21   | 8.8 | 6.1 | BDL | BDL  | 3.5 | C <sub>7</sub> H <sub>8</sub>   | 0.917 | 0.0059 | 0.0019 |
| 1-Hexene/2-Methyl-1-Pentene   | C <sub>6</sub> H <sub>12</sub>  | 21  | 9.7% | 64   | 25  | 16  | BDL | BDL  | 9.5 | C <sub>7</sub> H <sub>8</sub>   | 0.937 | 0.024  | 0.0065 |
| c-2-Hexene                    | C <sub>6</sub> H <sub>12</sub>  | 8.7 | BDL  | 9.1  | BDL | BDL | BDL | BDL  | BDL |                                 |       |        |        |
| t-2-Hexene                    | C <sub>6</sub> H <sub>12</sub>  | 5.5 | 6.5% | 13   | BDL | BDL | BDL | BDL  | BDL | C <sub>7</sub> H <sub>8</sub>   | 0.863 | 0.0042 | 0.0018 |
| t-3-Heptene                   | C <sub>7</sub> H <sub>14</sub>  | 6.5 | 8.0% | 7.6  | BDL | BDL | BDL | BDL  | BDL | C <sub>7</sub> H <sub>8</sub>   | 0.811 | 0.0027 | 0.0014 |
| t-2-Heptene                   | C <sub>7</sub> H <sub>14</sub>  | 5.5 | 6.1% | 11   | BDL | BDL | BDL | BDL  | BDL | C <sub>7</sub> H <sub>8</sub>   | 0.801 | 0.0036 | 0.0019 |

|                                   |                                 |     |      |      |      |      |     |     |     |                                 |       |        |        |
|-----------------------------------|---------------------------------|-----|------|------|------|------|-----|-----|-----|---------------------------------|-------|--------|--------|
| 1-Octene                          | C <sub>8</sub> H <sub>16</sub>  | 4.4 | 79%  | 100  | 14   | 7.4  | BDL | BDL | 5.3 |                                 |       |        |        |
| t-2-Octene                        | C <sub>8</sub> H <sub>16</sub>  | 3.7 | 8.0% | 35   | BDL  | BDL  | BDL | BDL | BDL |                                 |       |        |        |
| 1-Undecene                        | C <sub>11</sub> H <sub>22</sub> | 3.7 | 14%  | 18   | BDL  | BDL  | BDL | BDL | BDL |                                 |       |        |        |
| <b>Branched and Cycloalkenes</b>  |                                 |     |      |      |      |      |     |     |     |                                 |       |        |        |
| 2-Methyl-1-Butene                 | C <sub>5</sub> H <sub>10</sub>  | 6.9 | 12%  | 30   | 12   | 9.2  | BDL | BDL | 5.8 | C <sub>7</sub> H <sub>8</sub>   | 0.920 | 0.0088 | 0.0027 |
| 2-Methyl-2-Butene                 | C <sub>5</sub> H <sub>10</sub>  | 7.3 | 15%  | 15   | BDL  | BDL  | BDL | BDL | BDL |                                 |       |        |        |
| 3-Methyl-1-Butene                 | C <sub>5</sub> H <sub>10</sub>  | 2.5 | 13%  | 17   | 6.3  | 5.4  | BDL | BDL | 3.3 | C <sub>7</sub> H <sub>8</sub>   | 0.961 | 0.0053 | 0.0011 |
| 3-Methyl-1-Pentene                | C <sub>6</sub> H <sub>12</sub>  | 6.1 | BDL  | 8.2  | BDL  | BDL  | BDL | BDL | BDL | C <sub>7</sub> H <sub>8</sub>   | 0.811 | 0.0027 | 0.0014 |
| 4-Methyl-1-Pentene                | C <sub>6</sub> H <sub>12</sub>  | 6.8 | 5.1% | 15   | BDL  | BDL  | BDL | BDL | BDL |                                 |       |        |        |
| c-3-Methyl-2-Pentene              | C <sub>6</sub> H <sub>12</sub>  | 7.4 | BDL  | 7.0  | BDL  | BDL  | BDL | BDL | BDL |                                 |       |        |        |
| t-3-Methyl-2-Pentene              | C <sub>6</sub> H <sub>12</sub>  | 7.5 | BDL  | 2.7  | BDL  | BDL  | BDL | BDL | BDL |                                 |       |        |        |
| t-4-Methyl-2-Pentene              | C <sub>6</sub> H <sub>12</sub>  | 8.5 | BDL  | 11   | BDL  | BDL  | BDL | BDL | BDL |                                 |       |        |        |
| Cyclopentene                      | C <sub>5</sub> H <sub>8</sub>   | 14  | BDL  | 7.6  | BDL  | BDL  | BDL | BDL | BDL |                                 |       |        |        |
| 1-Methylcyclopentene              | C <sub>6</sub> H <sub>10</sub>  | 14  | BDL  | 11   | BDL  | BDL  | BDL | BDL | BDL |                                 |       |        |        |
| Cyclohexene                       | C <sub>6</sub> H <sub>10</sub>  | 8.7 | BDL  | 17   | BDL  | BDL  | BDL | BDL | BDL | C <sub>7</sub> H <sub>8</sub>   | 0.798 | 0.0056 | 0.003  |
| 1-Methylcyclohexene               | C <sub>7</sub> H <sub>14</sub>  | 7.7 | BDL  | 28   | 8.3  | BDL  | BDL | BDL | 3.1 | C <sub>7</sub> H <sub>8</sub>   | 0.971 | 0.0089 | 0.0016 |
| <b>Alkynes and Dienes</b>         |                                 |     |      |      |      |      |     |     |     |                                 |       |        |        |
| Ethyne                            | C <sub>2</sub> H <sub>2</sub>   | 9.4 | NR   | 910  | 380  | 270  | 210 | 60  | 230 | C <sub>3</sub> H <sub>4</sub> O | 0.862 | 2.53   | 0.085  |
| Propyne                           | C <sub>3</sub> H <sub>4</sub>   | 11  | 27%  | 25   | 20   | 16   | BDL | BDL | 9.3 |                                 |       |        |        |
| 1-Butyne                          | C <sub>4</sub> H <sub>6</sub>   | 6.4 | BDL  | 1.1  | BDL  | BDL  | BDL | BDL | BDL |                                 |       |        |        |
| 1,3-Butadiene                     | C <sub>4</sub> H <sub>6</sub>   | 6.8 | 6.9% | 21   | 8.1  | 6.2  | BDL | BDL | 3.9 | C <sub>8</sub> H <sub>10</sub>  | 0.948 | 0.0039 | 0.0015 |
| <b>Biogenic Hydrocarbons</b>      |                                 |     |      |      |      |      |     |     |     |                                 |       |        |        |
| Isoprene (2-Methyl-1,3-Butadiene) | C <sub>5</sub> H <sub>8</sub>   | 10  | 6.8% | 5000 | 2300 | 1300 | 560 | BDL | 910 |                                 |       |        |        |
| a-Pinene                          | C <sub>10</sub> H <sub>16</sub> | 13  | 12%  | 171  | 91   | 64   | 24  | BDL | 40  |                                 |       |        |        |
| b-Pinene                          | C <sub>10</sub> H <sub>16</sub> | 13  | 13%  | 370  | 210  | 64   | 14  | BDL | 55  | C <sub>9</sub> H <sub>12</sub>  | 0.975 | 0.14   | 0.0106 |
| Camphene                          | C <sub>10</sub> H <sub>16</sub> | 16  | 9.4% | 130  | 97   | 69   | 27  | BDL | 38  |                                 |       |        |        |
| Limonene                          | C <sub>10</sub> H <sub>16</sub> | 21  | 3.5% | 230  | 26   | 13   | BDL | BDL | 12  |                                 |       |        |        |
| <b>Chlorinated Hydrocarbons</b>   |                                 |     |      |      |      |      |     |     |     |                                 |       |        |        |
| Chloromethane                     | CH <sub>3</sub> Cl              | 8.1 | 4.5% | 730  | 680  | 660  | 630 | 530 | 630 |                                 |       |        |        |

|                      |                                               |     |      |     |     |     |     |     |     |                               |       |        |        |
|----------------------|-----------------------------------------------|-----|------|-----|-----|-----|-----|-----|-----|-------------------------------|-------|--------|--------|
| Dichloromethane      | CH <sub>2</sub> Cl <sub>2</sub>               | 4.2 | 4.2% | 140 | 73  | 70  | 65  | 56  | 67  |                               |       |        |        |
| Chloroform           | CHCl <sub>3</sub>                             | 4.5 | 5.8% | 33  | 25  | 22  | 18  | 12  | 19  |                               |       |        |        |
| 1,1-Dichloroethene   | C <sub>2</sub> H <sub>2</sub> Cl <sub>2</sub> | 5.6 | BDL  | BDL | BDL | BDL | BDL | BDL | BDL |                               |       |        |        |
| 1,2-Dichloroethane   | C <sub>2</sub> H <sub>4</sub> Cl <sub>2</sub> | 3.2 | 7.3% | 23  | 15  | 14  | 12  | 10  | 13  | C <sub>7</sub> H <sub>8</sub> | 0.893 | 0.0024 | 0.0009 |
| c-1,2-Dichloroethene | C <sub>2</sub> H <sub>2</sub> Cl <sub>2</sub> | 5.0 | BDL  | BDL | BDL | BDL | BDL | BDL | BDL |                               |       |        |        |
| Hexachlorobutadiene  | C <sub>4</sub> Cl <sub>6</sub>                | 5.2 | BDL  | BDL | BDL | BDL | BDL | BDL | BDL |                               |       |        |        |

Table S9. Canister sample VOC compound concentration statistics for the SUN facility. Empty entries for species indicate that there were no emission rates determined for those species. The details are similar to those explained for Table S8.

| Compound Name               | Formula                         | SUN ( n = 130) |                 |                 |        |     |      | Correlation with tracers to determine regression slope b |                |       |        |
|-----------------------------|---------------------------------|----------------|-----------------|-----------------|--------|-----|------|----------------------------------------------------------|----------------|-------|--------|
|                             |                                 | Max            | 90th percentile | 80th percentile | Median | Min | Mean | Tracer of Choice                                         | R <sup>2</sup> | b     | Δb     |
| <b>N-Alkanes</b>            |                                 |                |                 |                 |        |     |      |                                                          |                |       |        |
| Ethane                      | C <sub>2</sub> H <sub>6</sub>   | 2600           | 2570            | 2010            | 1000   | 620 | 1300 |                                                          |                |       |        |
| Propane                     | C <sub>3</sub> H <sub>8</sub>   | 910            | 870             | 650             | 460    | 230 | 510  | C <sub>9</sub> H <sub>12</sub>                           | 0.56           | 3.43  | 0.20   |
| Butane                      | C <sub>4</sub> H <sub>10</sub>  | 500            | 360             | 330             | 240    | 71  | 240  | C <sub>9</sub> H <sub>12</sub>                           | 0.76           | 4.04  | 0.13   |
| Pentane                     | C <sub>5</sub> H <sub>12</sub>  | 1400           | 900             | 780             | 660    | 68  | 630  | C <sub>6</sub> H <sub>10</sub>                           | 0.92           | 0.19  | 0.01   |
| Hexane                      | C <sub>6</sub> H <sub>14</sub>  | 590            | 540             | 330             | 280    | BLD | 240  |                                                          |                |       |        |
| Heptane                     | C <sub>7</sub> H <sub>16</sub>  | 740            | 580             | 490             | 340    | BLD | 290  | C <sub>9</sub> H <sub>12</sub>                           | 0.80           | 4.32  | 0.12   |
| Octane                      | C <sub>8</sub> H <sub>18</sub>  | 350            | 310             | 250             | 170    | BLD | 150  | C <sub>7</sub> H <sub>8</sub>                            | 0.96           | 2.14  | 0.07   |
| Nonane                      | C <sub>9</sub> H <sub>20</sub>  | 240            | 190             | 140             | 110    | BLD | 92   | C <sub>7</sub> H <sub>8</sub>                            | 0.98           | 1.05  | 0.03   |
| Decane                      | C <sub>10</sub> H <sub>22</sub> | 140            | 110             | 82              | 65     | BLD | 58   | C <sub>8</sub> H <sub>10</sub>                           | 0.95           | 0.51  | 0.02   |
| Undecane                    | C <sub>11</sub> H <sub>24</sub> | 75             | 73              | 68              | 45     | 3.5 | 40   | C <sub>10</sub> H <sub>20</sub>                          | 0.92           | 6.01  | 0.01   |
| Dodecane                    | C <sub>12</sub> H <sub>26</sub> | 100            | 57              | 54              | 35     | 5.1 | 39   | C <sub>4</sub> H <sub>8</sub>                            | 0.93           | 0.087 | 0.01   |
| <b>Branched Alkanes</b>     |                                 |                |                 |                 |        |     |      |                                                          |                |       |        |
| Isobutane (2-Methylpropane) | C <sub>4</sub> H <sub>10</sub>  | 150            | 130             | 100             | 76     | 34  | 82   |                                                          |                |       |        |
| 2-Methylbutane              | C <sub>5</sub> H <sub>12</sub>  | 960            | 540             | 530             | 430    | 64  | 420  | C <sub>9</sub> H <sub>12</sub>                           | 0.73           | 2.07  | 0.075  |
| 2,2-Dimethylpropane         | C <sub>5</sub> H <sub>12</sub>  | 230            | 77              | 58              | 30     | 15  | 53   | C <sub>6</sub> H <sub>10</sub>                           | 0.97           | 0.16  | 0.005  |
| 2-Methylpentane             | C <sub>6</sub> H <sub>14</sub>  | 410            | 260             | 220             | 110    | BLD | 130  | C <sub>9</sub> H <sub>12</sub>                           | 0.68           | 1.59  | 0.066  |
| 3-Methylpentane             | C <sub>6</sub> H <sub>14</sub>  | 220            | 150             | 140             | 67     | BLD | 78   | C <sub>9</sub> H <sub>12</sub>                           | 0.73           | 1.04  | 0.037  |
| 2,2-Dimethylbutane          | C <sub>6</sub> H <sub>14</sub>  | 75             | 37              | 29              | 15     | BLD | 20   | C <sub>12</sub> H <sub>18</sub>                          | 0.96           | 0.56  | 0.003  |
| 2,3-Dimethylbutane          | C <sub>6</sub> H <sub>14</sub>  | 84             | 50              | 34              | 23     | 5.1 | 28   | C <sub>3</sub> H <sub>4</sub> O                          | 0.93           | 0.21  | 0.003  |
| 2-Methylhexane              | C <sub>7</sub> H <sub>16</sub>  | 170            | 140             | 110             | 84     | BLD | 71   | C <sub>7</sub> H <sub>8</sub>                            | 0.95           | 0.48  | 0.017  |
| 3-Methylhexane              | C <sub>7</sub> H <sub>16</sub>  | 290            | 230             | 190             | 140    | 3.9 | 120  | C <sub>7</sub> H <sub>8</sub>                            | 0.96           | 0.80  | 0.027  |
| 2,2-Dimethylpentane         | C <sub>7</sub> H <sub>16</sub>  | BLD            | BLD             | BLD             | BLD    | BLD | BLD  | C <sub>6</sub> H <sub>6</sub>                            | 0.97           | 0.02  | 0.0002 |

|                                 |                                 |     |     |     |     |     |     |                                 |      |        |        |
|---------------------------------|---------------------------------|-----|-----|-----|-----|-----|-----|---------------------------------|------|--------|--------|
| 2,3-Dimethylpentane             | C <sub>7</sub> H <sub>16</sub>  | 87  | 71  | 59  | 43  | BLD | 40  | C <sub>7</sub> H <sub>8</sub>   | 0.96 | 0.22   | 0.007  |
| 2,4-Dimethylpentane             | C <sub>7</sub> H <sub>16</sub>  | 14  | 13  | 12  | 8.2 | BLD | 8.3 | C <sub>7</sub> H <sub>8</sub>   | 0.91 | 0.03   | 0.001  |
| 2,2,3-Trimethylbutane           | C <sub>7</sub> H <sub>16</sub>  | 61  | 17  | 12  | 7.7 | BLD | 13  | C <sub>6</sub> H <sub>10</sub>  | 0.98 | 0.04   | 0.001  |
| 2-Methylheptane                 | C <sub>8</sub> H <sub>18</sub>  | 230 | 190 | 170 | 110 | BDL | 95  | C <sub>7</sub> H <sub>8</sub>   | 0.99 | 0.68   | 0.076  |
| 3-Methylheptane                 | C <sub>8</sub> H <sub>18</sub>  | 90  | 72  | 64  | 43  | BLD | 37  | C <sub>7</sub> H <sub>8</sub>   | 0.98 | 0.25   | 0.006  |
| 4-Methylheptane                 | C <sub>8</sub> H <sub>18</sub>  | 67  | 57  | 49  | 33  | BLD | 31  | C <sub>7</sub> H <sub>8</sub>   | 0.97 | 0.17   | 0.019  |
| 2,4-Dimethylhexane              | C <sub>8</sub> H <sub>18</sub>  | 15  | 11  | 11  | 7.5 | BLD | 7   | C <sub>7</sub> H <sub>8</sub>   | 0.98 | 0.04   | 0.001  |
| 2,5-Dimethylhexane              | C <sub>8</sub> H <sub>18</sub>  | 13  | 10  | 10  | 6.9 | BDL | 5.9 | C <sub>7</sub> H <sub>8</sub>   | 0.98 | 0.03   | 0.001  |
| 2,3,4-Trimethylpentane          | C <sub>8</sub> H <sub>18</sub>  | 19  | 4.8 | 3.9 | BLD | BLD | 4.5 | C <sub>7</sub> H <sub>8</sub>   | 0.85 | 0.007  | 0.0005 |
| 2,2,4-Trimethylpentane          | C <sub>8</sub> H <sub>18</sub>  | 4.8 | 4.5 | 2.7 | BLD | BDL | BLD |                                 |      |        |        |
| 2,2-Dimethylhexane              | C <sub>8</sub> H <sub>18</sub>  | BLD | BDL | BDL | BDL | BDL | BLD |                                 |      |        |        |
| 2,2,5-Trimethylhexane           | C <sub>9</sub> H <sub>20</sub>  | BLD | BDL | BDL | BDL | BDL | BLD | C <sub>5</sub> H <sub>8</sub>   | 0.93 | 0.0005 | 0.0001 |
| 3,6-Dimethyloctane              | C <sub>10</sub> H <sub>22</sub> | 23  | 8.2 | 5.9 | 4.3 | BDL | 5.5 | C <sub>9</sub> H <sub>10</sub>  | 0.91 | 0.16   | 0.001  |
| <b>Cycloalkanes</b>             |                                 |     |     |     |     |     |     |                                 |      |        |        |
| Cyclopentane                    | C <sub>5</sub> H <sub>10</sub>  | 140 | 29  | 44  | 21  | BLD | 32  |                                 |      |        |        |
| Methylcyclopentane              | C <sub>6</sub> H <sub>12</sub>  | 260 | 230 | 160 | 130 | BLD | 110 | C <sub>9</sub> H <sub>12</sub>  | 0.83 | 1.86   | 0.048  |
| Cyclohexane                     | C <sub>6</sub> H <sub>12</sub>  | 88  | 78  | 58  | 47  | BLD | 39  | C <sub>9</sub> H <sub>12</sub>  | 0.84 | 0.58   | 0.015  |
| Methylcyclohexane               | C <sub>7</sub> H <sub>14</sub>  | 220 | 170 | 150 | 110 | BLD | 90  | C <sub>7</sub> H <sub>8</sub>   | 0.98 | 0.60   | 0.015  |
| c-1,3-Dimethylcyclohexane       | C <sub>8</sub> H <sub>16</sub>  | 59  | 52  | 45  | 28  | BLD | 26  | C <sub>7</sub> H <sub>8</sub>   | 0.95 | 0.15   | 0.005  |
| t-1,2-Dimethylcyclohexane       | C <sub>8</sub> H <sub>16</sub>  | 38  | 36  | 29  | 21  | BLD | 20  | C <sub>9</sub> H <sub>12</sub>  | 0.93 | 0.23   | 0.003  |
| c-1,4/t-1,3-Dimethylcyclohexane | C <sub>8</sub> H <sub>16</sub>  | 29  | 25  | 21  | 15  | BLD | 14  | C <sub>7</sub> H <sub>8</sub>   | 0.97 | 0.07   | 0.002  |
| t-1,4-Dimethylcyclohexane       | C <sub>8</sub> H <sub>16</sub>  | 13  | 11  | 10  | 6.8 | BLD | 6.4 | C <sub>9</sub> H <sub>12</sub>  | 0.96 | 0.08   | 0.001  |
| c-1,2-Dimethylcyclohexane       | C <sub>8</sub> H <sub>16</sub>  | 15  | 13  | 12  | 7.7 | BLD | 8   | C <sub>7</sub> H <sub>8</sub>   | 0.90 | 0.03   | 0.001  |
| <b>Aromatic Hydrocarbons</b>    |                                 |     |     |     |     |     |     |                                 |      |        |        |
| Benzene                         | C <sub>6</sub> H <sub>6</sub>   | 91  | 84  | 60  | 49  | 30  | 52  | C <sub>7</sub> H <sub>8</sub>   | 0.81 | 0.17   | 0.014  |
| Toluene                         | C <sub>7</sub> H <sub>8</sub>   | 400 | 320 | 260 | 180 | BLD | 170 | C <sub>7</sub> H <sub>8</sub>   | 0.94 | 1.04   | 0.043  |
| m,p-Xylene                      | C <sub>8</sub> H <sub>10</sub>  | 300 | 230 | 200 | 120 | BLD | 110 | C <sub>7</sub> H <sub>8</sub>   | 0.94 | 0.83   | 0.032  |
| o-Xylene                        | C <sub>8</sub> H <sub>10</sub>  | 120 | 94  | 90  | 55  | BLD | 50  | C <sub>7</sub> H <sub>8</sub>   | 0.96 | 0.31   | 0.009  |
| Ethylbenzene                    | C <sub>8</sub> H <sub>10</sub>  | 88  | 70  | 66  | 41  | BLD | 37  | C <sub>7</sub> H <sub>8</sub>   | 0.95 | 0.22   | 0.008  |
| 1,2,3-Trimethylbenzene          | C <sub>9</sub> H <sub>12</sub>  | 43  | 34  | 32  | 20  | BDL | 18  | C <sub>7</sub> H <sub>8</sub>   | 0.93 | 0.10   | 0.005  |
| 1,2,4-Trimethylbenzene          | C <sub>9</sub> H <sub>12</sub>  | 69  | 55  | 50  | 31  | BLD | 29  | C <sub>7</sub> H <sub>8</sub>   | 0.94 | 0.16   | 0.007  |
| 1,3,5-Trimethylbenzene          | C <sub>9</sub> H <sub>12</sub>  | 24  | 19  | 14  | 8.5 | BLD | 9.1 | C <sub>7</sub> H <sub>8</sub>   | 0.89 | 0.06   | 0.004  |
| 2-Ethyltoluene                  | C <sub>9</sub> H <sub>12</sub>  | 32  | 28  | 25  | 17  | BLD | 16  |                                 |      |        |        |
| 3-Ethyltoluene                  | C <sub>9</sub> H <sub>12</sub>  | 50  | 41  | 38  | 24  | BLD | 22  | C <sub>7</sub> H <sub>8</sub>   | 0.90 | 0.10   | 0.006  |
| 4-Ethyltoluene                  | C <sub>9</sub> H <sub>12</sub>  | 30  | 25  | 22  | 14  | BLD | 13  | C <sub>7</sub> H <sub>8</sub>   | 0.92 | 0.07   | 0.003  |
| n-Propylbenzene                 | C <sub>9</sub> H <sub>12</sub>  | 18  | 17  | 16  | 10  | BLD | 9.3 | C <sub>3</sub> H <sub>4</sub>   | 0.94 | 0.03   | 0.001  |
| iso-Propylbenzene               | C <sub>9</sub> H <sub>12</sub>  | 8.8 | 8   | 7.6 | BLD | BLD | BLD | C <sub>3</sub> H <sub>4</sub> O | 0.94 | 0.06   | 0.001  |
| n-Butylbenzene                  | C <sub>10</sub> H <sub>14</sub> | 5.8 | BLD | BLD | BLD | BDL | BLD | C <sub>4</sub> H <sub>8</sub>   | 0.96 | 0.01   | 0.0004 |
| iso-Butylbenzene                | C <sub>10</sub> H <sub>14</sub> | BLD | BLD | BLD | BLD | BDL | BLD | C <sub>12</sub> H <sub>18</sub> | 0.93 | 0.03   | 0.0002 |

|                                  |                                 |     |     |     |     |     |     |                                 |      |      |        |
|----------------------------------|---------------------------------|-----|-----|-----|-----|-----|-----|---------------------------------|------|------|--------|
| sec-Butylbenzene                 | C <sub>10</sub> H <sub>14</sub> | 5.8 | BLD | BLD | BLD | BLD | BLD | C <sub>4</sub> H <sub>6</sub> O | 0.96 | 0.03 | 0.001  |
| tert-Butylbenzene                | C <sub>10</sub> H <sub>14</sub> | BLD | BDL | BDL | BDL | BDL | BLD | C <sub>5</sub> H <sub>8</sub>   | 0.97 | 0.00 | 0.0004 |
| 1,2-Diethylbenzene               | C <sub>10</sub> H <sub>14</sub> | BLD | BLD | BLD | BLD | BDL | BLD | C <sub>4</sub> H <sub>6</sub> O | 0.94 | 0.02 | 0.0004 |
| 1,3-Diethylbenzene               | C <sub>10</sub> H <sub>14</sub> | BLD | BLD | BLD | BLD | BDL | BLD | C <sub>3</sub> H <sub>4</sub>   | 0.91 | 0.01 | 0.0004 |
| 1,4-Diethylbenzene               | C <sub>10</sub> H <sub>14</sub> | 15  | 14  | 13  | BLD | BLD | BLD | C <sub>3</sub> H <sub>4</sub> O | 0.92 | 0.08 | 0.001  |
| p-Cymene                         | C <sub>10</sub> H <sub>14</sub> | 12  | 12  | 12  | 11  | BLD | 9.4 |                                 |      |      |        |
| Hexylbenzene                     | C <sub>12</sub> H <sub>18</sub> | 9.9 | 6.4 | 4.7 | BLD | BLD | 4   | C <sub>7</sub> H <sub>8</sub>   | 0.78 | 0.07 | 0.006  |
| Styrene                          | C <sub>8</sub> H <sub>8</sub>   | BLD | BLD | BLD | BLD | BLD | BLD | C <sub>9</sub> H <sub>12</sub>  | 0.73 | 0.01 | 0.000  |
| Indane (2,3-Dihydroindene)       | C <sub>9</sub> H <sub>10</sub>  | 20  | 17  | 16  | 11  | BLD | 9   | C <sub>7</sub> H <sub>8</sub>   | 0.98 | 0.05 | 0.001  |
| Naphthalene                      | C <sub>10</sub> H <sub>8</sub>  | 23  | 21  | 10  | BLD | BLD | BLD |                                 |      |      |        |
| <b>Straight Chain Alkenes</b>    |                                 |     |     |     |     |     |     |                                 |      |      |        |
| Ethene                           | C <sub>2</sub> H <sub>4</sub>   | 730 | 660 | 430 | 240 | 88  | 310 | C <sub>9</sub> H <sub>12</sub>  | 0.88 | 10.4 | 0.1    |
| Propene                          | C <sub>3</sub> H <sub>6</sub>   | 220 | 190 | 130 | 89  | 36  | 99  | C <sub>9</sub> H <sub>12</sub>  | 0.88 | 2.7  | 0.03   |
| 1-Butene/2-Methylpropene         | C <sub>4</sub> H <sub>8</sub>   | 120 | 82  | 54  | 45  | BLD | 50  |                                 |      |      |        |
| c-2-Butene                       | C <sub>4</sub> H <sub>8</sub>   | 17  | 12  | 6.9 | BLD | BDL | BLD |                                 |      |      |        |
| t-2-Butene                       | C <sub>4</sub> H <sub>8</sub>   | 21  | 15  | 8.6 | BLD | BDL | 6.9 |                                 |      |      |        |
| 1-Pentene                        | C <sub>5</sub> H <sub>10</sub>  | 25  | BLD | BLD | BLD | BLD | BLD |                                 |      |      |        |
| c-2-Pentene                      | C <sub>5</sub> H <sub>10</sub>  | BLD | BLD | BLD | BLD | BLD | BLD |                                 |      |      |        |
| t-2-Pentene                      | C <sub>5</sub> H <sub>10</sub>  | 14  | 10  | 5.3 | BLD | BLD | 4.8 |                                 |      |      |        |
| 1-Hexene/2-Methyl-1-Pentene      | C <sub>6</sub> H <sub>12</sub>  | 23  | BLD | BLD | BLD | BLD | BLD |                                 |      |      |        |
| c-2-Hexene                       | C <sub>6</sub> H <sub>12</sub>  | BLD | BLD | BLD | BLD | BDL | BLD | C <sub>9</sub> H <sub>12</sub>  | 0.78 | 0.02 | 0.001  |
| t-2-Hexene                       | C <sub>6</sub> H <sub>12</sub>  | 7.3 | BLD | BLD | BLD | BLD | BLD | C <sub>7</sub> H <sub>8</sub>   | 0.83 | 0.02 | 0.001  |
| t-3-Heptene                      | C <sub>7</sub> H <sub>14</sub>  | BLD | BLD | BLD | BLD | BDL | BLD | C <sub>9</sub> H <sub>12</sub>  | 0.78 | 0.02 | 0.001  |
| t-2-Heptene                      | C <sub>7</sub> H <sub>14</sub>  | 5.1 | 4.8 | BLD | BLD | BDL | BLD |                                 |      |      |        |
| 1-Heptene                        | C <sub>7</sub> H <sub>14</sub>  | 54  | BLD | BLD | BDL | BDL | BLD |                                 |      |      |        |
| c-2-Heptene                      | C <sub>7</sub> H <sub>14</sub>  | BLD | BLD | BLD | BDL | BDL | BLD |                                 |      |      |        |
| c-3-Heptene                      | C <sub>7</sub> H <sub>14</sub>  | BDL | BDL | BDL | BDL | BDL | BDL |                                 |      |      |        |
| 1-Octene                         | C <sub>8</sub> H <sub>16</sub>  | 46  | 16  | 13  | BLD | BDL | 8.7 | C <sub>9</sub> H <sub>12</sub>  | 0.97 | 0.37 | 0.002  |
| t-2-Octene                       | C <sub>8</sub> H <sub>16</sub>  | BDL | BDL | BDL | BDL | BDL | BDL |                                 |      |      |        |
| 1-Nonene                         | C <sub>9</sub> H <sub>18</sub>  | BDL | BDL | BDL | BDL | BDL | BDL |                                 |      |      |        |
| 1-Decene                         | C <sub>10</sub> H <sub>20</sub> | 100 | 52  | 29  | 15  | 7.2 | 26  |                                 |      |      |        |
| 1-Undecene                       | C <sub>11</sub> H <sub>22</sub> | 62  | BDL | BDL | BDL | BDL | 5.1 |                                 |      |      |        |
| <b>Branched and Cycloalkenes</b> |                                 |     |     |     |     |     |     |                                 |      |      |        |
| 2-Methyl-1-Butene                | C <sub>5</sub> H <sub>10</sub>  | 14  | 11  | BLD | BLD | BLD | BLD |                                 |      |      |        |
| 2-Methyl-2-Butene                | C <sub>5</sub> H <sub>10</sub>  | 12  | 9.0 | BLD | BLD | BLD | BLD |                                 |      |      |        |
| 3-Methyl-1-Butene                | C <sub>5</sub> H <sub>10</sub>  | 8.0 | 5.4 | 3.9 | 3.1 | BLD | 3.3 |                                 |      |      |        |
| 3-Methyl-1-Pentene               | C <sub>6</sub> H <sub>12</sub>  | BLD | BLD | BLD | BLD | BDL | BLD |                                 |      |      |        |
| 4-Methyl-1-Pentene               | C <sub>6</sub> H <sub>12</sub>  | BLD | BLD | BLD | BLD | BDL | BLD | C <sub>9</sub> H <sub>12</sub>  | 0.74 | 0.04 | 0.002  |
| c-3-Methyl-2-Pentene             | C <sub>6</sub> H <sub>12</sub>  | BLD | BLD | BLD | BLD | BDL | BLD |                                 |      |      |        |



|                                   |                                               |     |     |     |     |     |     |                                 |      |         |        |
|-----------------------------------|-----------------------------------------------|-----|-----|-----|-----|-----|-----|---------------------------------|------|---------|--------|
| t-3-Methyl-2-Pentene              | C <sub>6</sub> H <sub>12</sub>                | BLD | BLD | BLD | BLD | BDL | BLD |                                 |      |         |        |
| t-4-Methyl-2-Pentene              | C <sub>6</sub> H <sub>12</sub>                | BDL | BDL | BDL | BDL | BDL | BDL |                                 |      |         |        |
| c-4-Methyl-2-Pentene              | C <sub>6</sub> H <sub>12</sub>                | BLD | BLD | BLD | BLD | BDL | BLD | C <sub>9</sub> H <sub>12</sub>  | 0.92 | 0.07    | 0.0007 |
| 2-Ethyl-1-Butene                  | C <sub>6</sub> H <sub>12</sub>                | BDL | BDL | BDL | BDL | BDL | BDL |                                 |      |         |        |
| Cyclopentene                      | C <sub>5</sub> H <sub>8</sub>                 | BLD | BLD | BLD | BLD | BDL | BLD |                                 |      |         |        |
| 1-Methylcyclopentene              | C <sub>6</sub> H <sub>10</sub>                | BLD | BLD | BLD | BLD | BDL | BLD |                                 |      |         |        |
| Cyclohexene                       | C <sub>6</sub> H <sub>10</sub>                | BLD | BLD | BLD | BLD | BDL | BLD | C <sub>7</sub> H <sub>8</sub>   | 0.81 | 0.01    | 0.001  |
| 1-Methylcyclohexene               | C <sub>7</sub> H <sub>14</sub>                | 10  | 8.2 | BLD | BLD | BLD | BLD | C <sub>7</sub> H <sub>8</sub>   | 0.81 | 0.03    | 0.002  |
| <b>Alkynes and Dienes</b>         |                                               |     |     |     |     |     |     |                                 |      |         |        |
| Ethyne                            | C <sub>2</sub> H <sub>2</sub>                 | 190 | 170 | 140 | 87  | 53  | 100 | C <sub>9</sub> H <sub>12</sub>  | 0.66 | 0.95    | 0.04   |
| Propyne                           | C <sub>3</sub> H <sub>4</sub>                 | 17  | 14  | BLD | BLD | BLD | BLD | C <sub>9</sub> H <sub>12</sub>  | 0.96 | 0.22    | 0.001  |
| 1-Butyne                          | C <sub>4</sub> H <sub>6</sub>                 | BDL | BDL | BDL | BDL | BDL | BDL |                                 |      |         |        |
| 1,3-Butadiene                     | C <sub>4</sub> H <sub>6</sub>                 | 13  | 10  | BLD | BLD | BLD | BLD |                                 |      |         |        |
| <b>Biogenic Hydrocarbons</b>      |                                               |     |     |     |     |     |     |                                 |      |         |        |
| Isoprene (2-Methyl-1,3-Butadiene) | C <sub>5</sub> H <sub>8</sub>                 | 870 | 730 | 690 | 550 | 250 | 550 |                                 |      |         |        |
| a-Pinene                          | C <sub>10</sub> H <sub>16</sub>               | 500 | 240 | 58  | 51  | 35  | 100 | C <sub>10</sub> H <sub>16</sub> | 0.99 | 0.52    | 0.032  |
| b-Pinene                          | C <sub>10</sub> H <sub>16</sub>               | 110 | 63  | 32  | 27  | 20  | 36  | C <sub>10</sub> H <sub>16</sub> | 0.99 | 0.09    | 0.006  |
| Limonene                          | C <sub>10</sub> H <sub>16</sub>               | 72  | 45  | 25  | BLD | BDL | 22  | C <sub>10</sub> H <sub>16</sub> | 0.99 | 0.06    | 0.004  |
| Camphene                          | C <sub>10</sub> H <sub>16</sub>               | 37  | 34  | 32  | 29  | BLD | 28  | C <sub>10</sub> H <sub>16</sub> | 0.99 | 0.20    | 0.004  |
| <b>Chlorinated Hydrocarbons</b>   |                                               |     |     |     |     |     |     |                                 |      |         |        |
| Chloromethane                     | CH <sub>3</sub> Cl                            | 690 | 680 | 650 | 630 | 580 | 630 |                                 |      |         |        |
| Dichloromethane                   | CH <sub>2</sub> Cl <sub>2</sub>               | 73  | 72  | 72  | 70  | 64  | 70  | C <sub>6</sub> H <sub>12</sub>  | 0.90 | 0.12    | 2E-03  |
| Chloroform                        | CHCl <sub>3</sub>                             | 23  | 22  | 21  | 21  | 19  | 21  | CO                              | 0.94 | 0.00024 | 5E-07  |
| 1,1-Dichloroethene                | C <sub>2</sub> H <sub>2</sub> Cl <sub>2</sub> | BDL | BDL | BDL | BDL | BDL | BDL | C <sub>2</sub> H <sub>4</sub> O | 0.99 | 0.001   | 5E-05  |
| 1,2-Dichloroethane                | C <sub>2</sub> H <sub>4</sub> Cl <sub>2</sub> | 15  | 15  | 14  | 14  | 12  | 14  | CO                              | 0.93 | 0.0002  | 4E-07  |
| c-1,2-Dichloroethene              | C <sub>2</sub> H <sub>2</sub> Cl <sub>2</sub> | BDL | BDL | BDL | BDL | BDL | BDL | C <sub>2</sub> H <sub>4</sub> O | 0.99 | 0.0007  | 5E-05  |
| Hexachlorobutadiene               | C <sub>4</sub> Cl <sub>6</sub>                | BLD | BLD | BDL | BLD | BLD | BLD | C <sub>4</sub> H <sub>6</sub> O | 0.91 | 0.002   | 8E-05  |

Table S10. Canister sample VOC compound concentration statistics for the CNRL facility. Empty entries for species indicate that there were no emission rates determined for those species. The details are similar to those explained for Table S8.

| Compound Name    | Formula                        | CNRL (n = 104) |                 |                 |        |     |      | Correlation with tracers to determine regression slope b |                |      |        |
|------------------|--------------------------------|----------------|-----------------|-----------------|--------|-----|------|----------------------------------------------------------|----------------|------|--------|
|                  |                                | Max            | 90th percentile | 80th percentile | Median | Min | Mean | Tracer of Choice                                         | R <sup>2</sup> | b    | Δb     |
| <b>N-Alkanes</b> |                                |                |                 |                 |        |     |      |                                                          |                |      |        |
| Ethane           | C <sub>2</sub> H <sub>6</sub>  | 4000           | 2300            | 1630            | 1100   | BDL | 1300 |                                                          |                |      |        |
| Propane          | C <sub>3</sub> H <sub>8</sub>  | 1600           | 1100            | 940             | 580    | BDL | 620  | CH <sub>4</sub>                                          | 1.00           | 0.01 | 0.0003 |
| Butane           | C <sub>4</sub> H <sub>10</sub> | 900            | 530             | 450             | 220    | BDL | 280  | C <sub>10</sub> H <sub>14</sub>                          | 1.00           | 6.04 | 0.01   |

|                             |                                 |      |      |      |     |     |      |                                 |      |       |         |
|-----------------------------|---------------------------------|------|------|------|-----|-----|------|---------------------------------|------|-------|---------|
| Pentane                     | C <sub>5</sub> H <sub>12</sub>  | 1800 | 890  | 800  | 63  | BDL | 330  |                                 |      |       |         |
| Hexane                      | C <sub>6</sub> H <sub>14</sub>  | 530  | 270  | 210  | 21  | BDL | 96   |                                 |      |       |         |
| Heptane                     | C <sub>7</sub> H <sub>16</sub>  | 1700 | 380  | 160  | 22  | BDL | 130  | C <sub>4</sub> H <sub>6</sub> O | 0.99 | 0.31  | 0.001   |
| Octane                      | C <sub>8</sub> H <sub>18</sub>  | 630  | 150  | 80   | 10  | BDL | 58   | C <sub>4</sub> H <sub>6</sub> O | 1.00 | 1.14  | 0.01    |
| Nonane                      | C <sub>9</sub> H <sub>20</sub>  | 300  | 68   | 39   | 6.3 | BDL | 27   | C <sub>4</sub> H <sub>6</sub> O | 1.00 | 0.51  | 0.01    |
| Decane                      | C <sub>10</sub> H <sub>22</sub> | 99   | 28   | 17   | BLD | BDL | 11   | C <sub>4</sub> H <sub>6</sub> O | 1.00 | 0.22  | 0.01    |
| Undecane                    | C <sub>11</sub> H <sub>24</sub> | 40   | 19   | 14   | 4.4 | BDL | 7.7  | C <sub>4</sub> H <sub>6</sub> O | 0.99 | 0.08  | 0.004   |
| Dodecane                    | C <sub>12</sub> H <sub>26</sub> | 75   | 35   | 24   | 8.4 | BDL | 14   | C <sub>10</sub> H <sub>16</sub> | 0.97 | 0.028 | 0.001   |
| <b>Branched Alkanes</b>     |                                 |      |      |      |     |     |      |                                 |      |       |         |
| Isobutane (2-Methylpropane) | C <sub>4</sub> H <sub>10</sub>  | 6100 | 1400 | 1100 | 230 | BDL | 570  | C <sub>3</sub> H <sub>6</sub>   | 0.96 | 6.15  | 0.03    |
| 2-Methylbutane              | C <sub>5</sub> H <sub>12</sub>  | 8700 | 2700 | 1900 | 470 | BDL | 1000 | C <sub>3</sub> H <sub>6</sub>   | 0.96 | 8.61  | 0.005   |
| 2,2-Dimethylpropane         | C <sub>5</sub> H <sub>12</sub>  | 580  | 290  | 220  | 36  | BDL | 110  | C <sub>3</sub> H <sub>6</sub>   | 1.00 | 0.62  | 0.007   |
| 2-Methylpentane             | C <sub>6</sub> H <sub>14</sub>  | 1100 | 530  | 450  | 25  | BDL | 190  | C <sub>3</sub> H <sub>6</sub>   | 0.99 | 0.32  | 0.0001  |
| 3-Methylpentane             | C <sub>6</sub> H <sub>14</sub>  | 2100 | 760  | 590  | 130 | BDL | 280  | C <sub>3</sub> H <sub>6</sub>   | 0.98 | 2.4   | 0.00002 |
| 2,2-Dimethylbutane          | C <sub>6</sub> H <sub>14</sub>  | 510  | 270  | 200  | 33  | BDL | 94   | C <sub>3</sub> H <sub>6</sub>   | 0.96 | 0.56  | 0.00003 |
| 2,3-Dimethylbutane          | C <sub>6</sub> H <sub>14</sub>  | 1000 | 490  | 340  | 74  | BDL | 160  | C <sub>3</sub> H <sub>6</sub>   | 0.99 | 1.87  | 0.0001  |
| 2-Methylhexane              | C <sub>7</sub> H <sub>16</sub>  | 340  | 85   | 46   | 10  | BDL | 32   | C <sub>7</sub> H <sub>8</sub>   | 0.98 | 0.77  | 0.001   |
| 3-Methylhexane              | C <sub>7</sub> H <sub>16</sub>  | 620  | 170  | 98   | 23  | BDL | 63   | C <sub>10</sub> H <sub>16</sub> | 0.99 | 0.41  | 0.01    |
| 2,2-Dimethylpentane         | C <sub>7</sub> H <sub>16</sub>  | 120  | 48   | 35   | BLD | BDL | 16   | C <sub>3</sub> H <sub>6</sub>   | 0.98 | 0.11  | 0.001   |
| 2,3-Dimethylpentane         | C <sub>7</sub> H <sub>16</sub>  | 520  | 240  | 180  | 39  | BDL | 86   | C <sub>3</sub> H <sub>6</sub>   | 0.96 | 0.44  | 0.05    |
| 2,4-Dimethylpentane         | C <sub>7</sub> H <sub>16</sub>  | 180  | 73   | 55   | 13  | BDL | 26   | C <sub>3</sub> H <sub>6</sub>   | 0.99 | 0.17  | 0.0009  |
| 2,2,3-Trimethylbutane       | C <sub>7</sub> H <sub>16</sub>  | 140  | 79   | 57   | 12  | BDL | 28   |                                 |      |       |         |
| 2-Methylheptane             | C <sub>8</sub> H <sub>18</sub>  | 550  | 130  | 97   | 15  | BDL | 55   | C <sub>4</sub> H <sub>6</sub> O | 0.98 | 0.37  | 0.002   |
| 3-Methylheptane             | C <sub>8</sub> H <sub>18</sub>  | 190  | 46   | 22   | BLD | BDL | 17   | C <sub>4</sub> H <sub>6</sub> O | 1.00 | 0.14  | 0.002   |
| 4-Methylheptane             | C <sub>8</sub> H <sub>18</sub>  | 150  | 50   | 36   | 4.7 | BDL | 19   | C <sub>3</sub> H <sub>6</sub> O | 0.98 | 0.05  | 0.02    |
| 2,4-Dimethylhexane          | C <sub>8</sub> H <sub>18</sub>  | 120  | 56   | 39   | 5.9 | BDL | 18   | C <sub>5</sub> H <sub>8</sub>   | 0.99 | 0.04  | 0.0006  |
| 2,5-Dimethylhexane          | C <sub>8</sub> H <sub>18</sub>  | 37   | 16   | 12   | BLD | BDL | 5.7  | C <sub>9</sub> H <sub>10</sub>  | 0.99 | 0.62  | 0.0004  |
| 2,3,4-Trimethylpentane      | C <sub>8</sub> H <sub>18</sub>  | 100  | 51   | 35   | 8.1 | BDL | 18   | C <sub>3</sub> H <sub>6</sub>   | 0.99 | 0.09  | 0.02    |
| 2,2,4-Trimethylpentane      | C <sub>8</sub> H <sub>18</sub>  | 97   | BLD  | BDL  | BDL | BDL | 2.7  |                                 |      |       |         |
| 2,2-Dimethylhexane          | C <sub>8</sub> H <sub>18</sub>  | 25   | BDL  | BDL  | BDL | BDL | BLD  |                                 |      |       |         |
| 2,2,5-Trimethylhexane       | C <sub>9</sub> H <sub>20</sub>  | 3.1  | BLD  | BLD  | BDL | BDL | BLD  | C <sub>6</sub> H <sub>12</sub>  | 0.97 | 0.011 | 0.0004  |
| 3,6-Dimethyloctane          | C <sub>10</sub> H <sub>22</sub> | 43   | 14.4 | 7.5  | BDL | BDL | 4.4  |                                 |      |       |         |
| <b>Cycloalkanes</b>         |                                 |      |      |      |     |     |      |                                 |      |       |         |
| Cyclopentane                | C <sub>5</sub> H <sub>10</sub>  | 820  | 420  | 300  | 65  | BDL | 150  | C <sub>3</sub> H <sub>6</sub>   | 0.96 | 0.73  | 0.0002  |
| Methylcyclopentane          | C <sub>6</sub> H <sub>12</sub>  | 1900 | 590  | 450  | 69  | BDL | 210  | C <sub>3</sub> H <sub>6</sub>   | 1.00 | 1.67  | 0.05    |
| Cyclohexane                 | C <sub>6</sub> H <sub>12</sub>  | 2400 | 890  | 610  | 78  | BDL | 300  | C <sub>3</sub> H <sub>6</sub>   | 0.97 | 2.10  | 0.002   |
| Methylcyclohexane           | C <sub>7</sub> H <sub>14</sub>  | 1700 | 460  | 370  | 67  | BDL | 180  | C <sub>3</sub> H <sub>6</sub>   | 0.96 | 0.99  | 0.0002  |
| c-1,3-Dimethylcyclohexane   | C <sub>8</sub> H <sub>16</sub>  | 490  | 150  | 13   | 24  | BDL | 60   | C <sub>5</sub> H <sub>8</sub>   | 1.00 | 0.14  | 0.009   |
| t-1,2-Dimethylcyclohexane   | C <sub>8</sub> H <sub>16</sub>  | 650  | 310  | 190  | 42  | BDL | 99   | C <sub>3</sub> H <sub>6</sub>   | 1.00 | 0.49  | 0.004   |

|                                 |                                 |      |     |     |     |     |     |                                 |      |       |        |
|---------------------------------|---------------------------------|------|-----|-----|-----|-----|-----|---------------------------------|------|-------|--------|
| c-1,4/t-1,3-Dimethylcyclohexane | C <sub>8</sub> H <sub>16</sub>  | 160  | 83  | 63  | 14  | BDL | 29  |                                 |      |       |        |
| t-1,4-Dimethylcyclohexane       | C <sub>8</sub> H <sub>16</sub>  | 200  | 66  | 50  | 10  | BDL | 26  | C <sub>3</sub> H <sub>6</sub>   | 1.00 | 0.20  | 0.004  |
| c-1,2-Dimethylcyclohexane       | C <sub>8</sub> H <sub>16</sub>  | 71   | 42  | 31  | 6.4 | BDL | 14  |                                 |      |       |        |
| <b>Aromatic Hydrocarbons</b>    |                                 |      |     |     |     |     |     |                                 |      |       |        |
| Benzene                         | C <sub>6</sub> H <sub>6</sub>   | 130  | 87  | 74  | 26  | BDL | 42  |                                 |      |       |        |
| Toluene                         | C <sub>7</sub> H <sub>8</sub>   | 340  | 120 | 96  | BLD | BDL | 52  | C <sub>4</sub> H <sub>6</sub> O | 1.00 | 0.24  | 0.001  |
| m,p-Xylene                      | C <sub>8</sub> H <sub>10</sub>  | 240  | 60  | 46  | BLD | BDL | 27  | C <sub>4</sub> H <sub>6</sub> O | 0.98 | 0.14  | 0.01   |
| o-Xylene                        | C <sub>8</sub> H <sub>10</sub>  | 110  | 34  | 22  | BLD | BDL | 13  | C <sub>10</sub> H <sub>16</sub> | 0.99 | 0.06  | 0.002  |
| Ethylbenzene                    | C <sub>8</sub> H <sub>10</sub>  | 85   | 24  | 18  | BLD | BDL | 10  |                                 |      |       |        |
| 1,2,3-Trimethylbenzene          | C <sub>9</sub> H <sub>12</sub>  | 43   | 20  | 13  | BLD | BDL | 6.8 | C <sub>6</sub> H <sub>8</sub>   | 0.99 | 0.03  | 0.001  |
| 1,2,4-Trimethylbenzene          | C <sub>9</sub> H <sub>12</sub>  | 57   | 23  | 15  | BLD | BDL | BLD |                                 |      |       |        |
| 1,3,5-Trimethylbenzene          | C <sub>9</sub> H <sub>12</sub>  | 34   | 20  | 13  | BLD | BDL | BLD | C <sub>9</sub> H <sub>10</sub>  | 1.00 | 0.91  | 0.001  |
| 2-Ethyltoluene                  | C <sub>9</sub> H <sub>12</sub>  | 30   | 11  | 8   | BLD | BDL | BLD | C <sub>10</sub> H <sub>16</sub> | 1.00 | 0.03  | 0.0001 |
| 3-Ethyltoluene                  | C <sub>9</sub> H <sub>12</sub>  | 46   | 15  | 11  | BLD | BDL | BLD |                                 |      |       |        |
| 4-Ethyltoluene                  | C <sub>9</sub> H <sub>12</sub>  | 23   | 7   | BLD | BLD | BDL | BLD |                                 |      |       |        |
| n-Propylbenzene                 | C <sub>9</sub> H <sub>12</sub>  | 19   | 9   | BLD | BLD | BDL | BLD |                                 |      |       |        |
| iso-Propylbenzene               | C <sub>9</sub> H <sub>12</sub>  | 110  | 10  | BLD | BLD | BDL | BLD | C <sub>6</sub> H <sub>8</sub>   | 1.00 | 0.004 | 0.001  |
| n-Butylbenzene                  | C <sub>10</sub> H <sub>14</sub> | BLD  | BLD | BLD | BDL | BDL | BLD |                                 |      |       |        |
| iso-Butylbenzene                | C <sub>10</sub> H <sub>14</sub> | 11   | BLD | BLD | BLD | BDL | BLD |                                 |      |       |        |
| sec-Butylbenzene                | C <sub>10</sub> H <sub>14</sub> | 6.9  | BLD | BLD | BLD | BDL | BLD |                                 |      |       |        |
| tert-Butylbenzene               | C <sub>10</sub> H <sub>14</sub> | BLD  | BLD | BDL | BDL | BDL | BLD | C <sub>6</sub> H <sub>8</sub>   | 0.97 | 0.002 | 0.0002 |
| 1,2-Diethylbenzene              | C <sub>10</sub> H <sub>14</sub> | 7.4  | BLD | BLD | BLD | BDL | BLD |                                 |      |       |        |
| 1,3-Diethylbenzene              | C <sub>10</sub> H <sub>14</sub> | 13   | BLD | BLD | BLD | BDL | BLD |                                 |      |       |        |
| 1,4-Diethylbenzene              | C <sub>10</sub> H <sub>14</sub> | 9.9  | BLD | BLD | BDL | BDL | BLD |                                 |      |       |        |
| p-Cymene                        | C <sub>10</sub> H <sub>14</sub> | 16   | 11  | 10  | 7.4 | BDL | 7.1 |                                 |      |       |        |
| Hexylbenzene                    | C <sub>12</sub> H <sub>18</sub> | 9    | 4.5 | BLD | BLD | BDL | BLD |                                 |      |       |        |
| Styrene                         | C <sub>8</sub> H <sub>8</sub>   | BLD  | BLD | BLD | BLD | BDL | BLD | C <sub>4</sub> H <sub>6</sub> O | 0.97 | 0.008 | 0.0004 |
| Indane (2,3-Dihydroindene)      | C <sub>9</sub> H <sub>10</sub>  | 14   | BLD | BLD | BLD | BDL | BLD | C <sub>6</sub> H <sub>6</sub>   | 0.99 | 0.10  | 0.004  |
| Naphthalene                     | C <sub>10</sub> H <sub>8</sub>  | 12   | BLD | BLD | BLD | BDL | BLD |                                 |      |       |        |
| <b>Straight Chain Alkenes</b>   |                                 |      |     |     |     |     |     |                                 |      |       |        |
| Ethene                          | C <sub>2</sub> H <sub>4</sub>   | 1200 | 480 | 380 | 180 | BDL | 260 |                                 |      |       |        |
| Propene                         | C <sub>3</sub> H <sub>6</sub>   | 340  | 140 | 100 | 54  | BDL | 73  |                                 |      |       |        |
| 1-Butene/2-Methylpropene        | C <sub>4</sub> H <sub>8</sub>   | 110  | 53  | 45  | 27  | BDL | 31  |                                 |      |       |        |
| c-2-Butene                      | C <sub>4</sub> H <sub>8</sub>   | 12   | BLD | BLD | BLD | BDL | BLD |                                 |      |       |        |
| t-2-Butene                      | C <sub>4</sub> H <sub>8</sub>   | 8.8  | BLD | BLD | BDL | BDL | BLD |                                 |      |       |        |
| 1-Pentene                       | C <sub>5</sub> H <sub>10</sub>  | 26   | BLD | BLD | BLD | BDL | BLD |                                 |      |       |        |
| c-2-Pentene                     | C <sub>5</sub> H <sub>10</sub>  | BLD  | BLD | BLD | BDL | BDL | BLD |                                 |      |       |        |
| t-2-Pentene                     | C <sub>5</sub> H <sub>10</sub>  | 7.9  | BLD | BLD | BLD | BDL | BLD |                                 |      |       |        |
| 1-Hexene/2-Methyl-1-Pentene     | C <sub>6</sub> H <sub>12</sub>  | 22   | BLD | BLD | BLD | BDL | BLD |                                 |      |       |        |

|                                   |                                 |      |      |     |     |     |     |                                 |      |       |        |
|-----------------------------------|---------------------------------|------|------|-----|-----|-----|-----|---------------------------------|------|-------|--------|
| c-2-Hexene                        | C <sub>6</sub> H <sub>12</sub>  | BLD  | BLD  | BLD | BDL | BDL | BLD |                                 |      |       |        |
| t-2-Hexene                        | C <sub>6</sub> H <sub>12</sub>  | BLD  | BLD  | BLD | BDL | BDL | BLD | C <sub>4</sub> H <sub>6</sub> O | 1.00 | 0.006 | 0.002  |
| t-3-Heptene                       | C <sub>7</sub> H <sub>14</sub>  | BLD  | BDL  | BDL | BDL | BDL | BLD |                                 |      |       |        |
| t-2-Heptene                       | C <sub>7</sub> H <sub>14</sub>  | BLD  | BLD  | BDL | BDL | BDL | BLD | C <sub>4</sub> H <sub>6</sub> O | 1.00 | 0.002 | 0.0006 |
| 1-Heptene                         | C <sub>7</sub> H <sub>14</sub>  | BLD  | BDL  | BDL | BDL | BDL | BLD |                                 |      |       |        |
| c-2-Heptene                       | C <sub>7</sub> H <sub>14</sub>  | BLD  | BDL  | BDL | BDL | BDL | BLD |                                 |      |       |        |
| c-3-Heptene                       | C <sub>7</sub> H <sub>14</sub>  | BLD  | BDL  | BDL | BDL | BDL | BLD |                                 |      |       |        |
| 1-Octene                          | C <sub>8</sub> H <sub>16</sub>  | 390  | 110  | 41  | BDL | BDL | 32  |                                 |      |       |        |
| t-2-Octene                        | C <sub>8</sub> H <sub>16</sub>  | 420  | 86   | 22  | BDL | BDL | 27  | C <sub>8</sub> H <sub>16</sub>  | 0.99 | 23.9  | 0.0003 |
| 1-Nonene                          | C <sub>9</sub> H <sub>18</sub>  | 360  | BLD  | BDL | BDL | BDL | 8.3 |                                 |      |       |        |
| 1-Decene                          | C <sub>10</sub> H <sub>20</sub> | 250  | 100  | 59  | 7   | BDL | 34  |                                 |      |       |        |
| 1-Undecene                        | C <sub>11</sub> H <sub>22</sub> | 49   | BLD  | BDL | BDL | BDL | BLD | C <sub>4</sub> H <sub>6</sub> O | 1.00 | 0.076 | 0.005  |
| <b>Branched and Cycloalkenes</b>  |                                 |      |      |     |     |     |     |                                 |      |       |        |
| 2-Methyl-1-Butene                 | C <sub>5</sub> H <sub>10</sub>  | 11   | 7    | BLD | BLD | BDL | BLD |                                 |      |       |        |
| 2-Methyl-2-Butene                 | C <sub>5</sub> H <sub>10</sub>  | BLD  | BLD  | BLD | BLD | BDL | BLD |                                 |      |       |        |
| 3-Methyl-1-Butene                 | C <sub>5</sub> H <sub>10</sub>  | 6.1  | 3.9  | 2.7 | BLD | BDL | BLD |                                 |      |       |        |
| 3-Methyl-1-Pentene                | C <sub>6</sub> H <sub>12</sub>  | BLD  | BLD  | BLD | BDL | BDL | BLD |                                 |      |       |        |
| 4-Methyl-1-Pentene                | C <sub>6</sub> H <sub>12</sub>  | BLD  | BDL  | BDL | BDL | BDL | BLD |                                 |      |       |        |
| c-3-Methyl-2-Pentene              | C <sub>6</sub> H <sub>12</sub>  | BLD  | BDL  | BDL | BDL | BDL | BLD |                                 |      |       |        |
| t-3-Methyl-2-Pentene              | C <sub>6</sub> H <sub>12</sub>  | BLD  | BDL  | BDL | BDL | BDL | BLD |                                 |      |       |        |
| t-4-Methyl-2-Pentene              | C <sub>6</sub> H <sub>12</sub>  | 16   | 10   | BLD | BDL | BDL | BLD | C <sub>8</sub> H <sub>16</sub>  | 0.96 | 0.94  | 0.001  |
| c-4-Methyl-2-Pentene              | C <sub>6</sub> H <sub>12</sub>  | BLD  | BLD  | BDL | BDL | BDL | BLD |                                 |      |       |        |
| 2-Ethyl-1-Butene                  | C <sub>6</sub> H <sub>12</sub>  | BLD  | BDL  | BDL | BDL | BDL | BLD |                                 |      |       |        |
| Cyclopentene                      | C <sub>5</sub> H <sub>8</sub>   | BLD  | BLD  | BLD | BLD | BDL | BLD |                                 |      |       |        |
| 1-Methylcyclopentene              | C <sub>6</sub> H <sub>10</sub>  | BLD  | BLD  | BLD | BLD | BDL | BLD |                                 |      |       |        |
| Cyclohexene                       | C <sub>6</sub> H <sub>10</sub>  | BLD  | BLD  | BLD | BDL | BDL | BLD |                                 |      |       |        |
| 1-Methylcyclohexene               | C <sub>7</sub> H <sub>14</sub>  | BLD  | BLD  | BLD | BLD | BDL | BLD |                                 |      |       |        |
| <b>Alkynes and Dienes</b>         |                                 |      |      |     |     |     |     |                                 |      |       |        |
| Ethyne                            | C <sub>2</sub> H <sub>2</sub>   | 1000 | 210  | 160 | 78  | BDL | 130 |                                 |      |       |        |
| Propyne                           | C <sub>3</sub> H <sub>4</sub>   | 61   | 17   | 13  | BLD | BDL | BLD |                                 |      |       |        |
| 1-Butyne                          | C <sub>4</sub> H <sub>6</sub>   | BLD  | BDL  | BDL | BDL | BDL | BLD |                                 |      |       |        |
| 1,3-Butadiene                     | C <sub>4</sub> H <sub>6</sub>   | 26   | 10   | 7   | BLD | BDL | BLD |                                 |      |       |        |
| <b>Biogenic Hydrocarbons</b>      |                                 |      |      |     |     |     |     |                                 |      |       |        |
| Isoprene (2-Methyl-1,3-Butadiene) | C <sub>5</sub> H <sub>8</sub>   | 1500 | 1100 | 930 | 610 | BDL | 680 | C <sub>4</sub> H <sub>6</sub> O | 0.98 | 2.17  | 0.001  |
| a-Pinene                          | C <sub>10</sub> H <sub>16</sub> | 230  | 86   | 67  | 43  | BDL | 51  |                                 |      |       |        |
| b-Pinene                          | C <sub>10</sub> H <sub>16</sub> | 160  | 100  | 65  | 46  | BDL | 55  | C <sub>4</sub> H <sub>6</sub> O | 0.99 | 0.35  | 0.002  |
| Limonene                          | C <sub>10</sub> H <sub>16</sub> | 81   | BLD  | BLD | BDL | BDL | BLD |                                 |      |       |        |
| Camphene                          | C <sub>10</sub> H <sub>16</sub> | 88   | 64   | 46  | 38  | BDL | 40  | C <sub>4</sub> H <sub>6</sub> O | 0.97 | 0.17  | 0.01   |
| <b>Chlorinated Hydrocarbons</b>   |                                 |      |      |     |     |     |     |                                 |      |       |        |

|                      |                                               |     |     |     |     |     |     |                               |      |       |        |
|----------------------|-----------------------------------------------|-----|-----|-----|-----|-----|-----|-------------------------------|------|-------|--------|
| Chloromethane        | CH <sub>3</sub> Cl                            | 810 | 700 | 690 | 650 | BDL | 630 | CO                            | 0.95 | 0.008 | 0.002  |
| Dichloromethane      | CH <sub>2</sub> Cl <sub>2</sub>               | 81  | 77  | 75  | 68  | BDL | 68  |                               |      |       |        |
| Chloroform           | CHCl <sub>3</sub>                             | 25  | 21  | 20  | 16  | BDL | 17  |                               |      |       |        |
| 1,1-Dichloroethene   | C <sub>2</sub> H <sub>2</sub> Cl <sub>2</sub> | BLD | BDL | BDL | BDL | BDL | BLD |                               |      |       |        |
| 1,2-Dichloroethane   | C <sub>2</sub> H <sub>4</sub> Cl <sub>2</sub> | 25  | 17  | 15  | 14  | BDL | 14  | C <sub>3</sub> H <sub>6</sub> | 0.98 | 0.01  | 0.0004 |
| c-1,2-Dichloroethene | C <sub>2</sub> H <sub>2</sub> Cl <sub>2</sub> | BLD | BDL | BDL | BDL | BDL | BLD |                               |      |       |        |
| Hexachlorobutadiene  | C <sub>4</sub> Cl <sub>6</sub>                | BLD | BDL | BDL | BDL | BDL | BLD |                               |      |       |        |

Table S11. Canister sample VOC compound concentration statistics for the SAJ facility. Empty entries for species indicate that there were no emission rates determined for those species. The details are similar to those explained for Table S8.

| Compound Name               | Formula                         | SAJ (n = 76) |                 |                 |        |     |      | Correlation with tracers to determine regression slope b |                |      |       |
|-----------------------------|---------------------------------|--------------|-----------------|-----------------|--------|-----|------|----------------------------------------------------------|----------------|------|-------|
|                             |                                 | Max          | 90th percentile | 80th percentile | Median | Min | Mean | Tracer of Choice                                         | R <sup>2</sup> | b    | Δb    |
| <b>N-Alkanes</b>            |                                 |              |                 |                 |        |     |      |                                                          |                |      |       |
| Ethane                      | C <sub>2</sub> H <sub>6</sub>   | 2500         | 1200            | 1100            | 910    | 560 | 940  |                                                          |                |      |       |
| Propane                     | C <sub>3</sub> H <sub>8</sub>   | 790          | 370             | 330             | 200    | 110 | 230  | C <sub>9</sub> H <sub>10</sub>                           | 0.97           | 4.18 | 0.031 |
| Butane                      | C <sub>4</sub> H <sub>10</sub>  | 400          | 110             | 85              | 59     | 16  | 68   | C <sub>5</sub> H <sub>10</sub>                           | 0.96           | 0.61 | 0.012 |
| Pentane                     | C <sub>5</sub> H <sub>12</sub>  | 13000        | 2400            | 1500            | 67     | BLD | 1100 |                                                          |                |      |       |
| Hexane                      | C <sub>6</sub> H <sub>14</sub>  | 2700         | 460             | 270             | BLD    | BLD | 210  | C <sub>6</sub> H <sub>6</sub>                            | 0.97           | 30.7 | 0.9   |
| Heptane                     | C <sub>7</sub> H <sub>16</sub>  | 810          | 54              | 24              | BLD    | BDL | 25   | C <sub>6</sub> H <sub>6</sub>                            | 0.98           | 6.00 | 0.14  |
| Octane                      | C <sub>8</sub> H <sub>18</sub>  | 650          | 18              | 11              | BLD    | BDL | 14   | C <sub>9</sub> H <sub>10</sub>                           | 0.99           | 1.26 | 0.006 |
| Nonane                      | C <sub>9</sub> H <sub>20</sub>  | 260          | 10              | 7               | BLD    | BDL | 7    | C <sub>8</sub> H <sub>16</sub>                           | 0.99           | 1.38 | 0.002 |
| Decane                      | C <sub>10</sub> H <sub>22</sub> | 92           | 6               | 5               | BLD    | BDL | 5.3  | C <sub>8</sub> H <sub>16</sub>                           | 0.97           | 0.77 | 0.002 |
| Undecane                    | C <sub>11</sub> H <sub>24</sub> | 52           | 9               | 8               | 3.6    | BDL | 6    |                                                          |                |      |       |
| Dodecane                    | C <sub>12</sub> H <sub>26</sub> | 68           | 21              | 15              | 6.5    | BDL | 10   |                                                          |                |      |       |
| <b>Branched Alkanes</b>     |                                 |              |                 |                 |        |     |      |                                                          |                |      |       |
| Isobutane (2-Methylpropane) | C <sub>4</sub> H <sub>10</sub>  | 540          | 140             | 63              | 24     | BLD | 51   | C <sub>4</sub> H <sub>6</sub> O                          | 0.99           | 1.02 | 0.018 |
| 2-Methylbutane              | C <sub>5</sub> H <sub>12</sub>  | 8600         | 1500            | 990             | 88     | BLD | 710  | C <sub>6</sub> H <sub>6</sub>                            | 0.99           | 18.0 | 0.3   |
| 2,2-Dimethylpropane         | C <sub>5</sub> H <sub>12</sub>  | 160          | 110             | 66              | 25     | BDL | 39   | C <sub>8</sub> H <sub>10</sub>                           | 0.95           | 0.86 | 0.01  |
| 2-Methylpentane             | C <sub>6</sub> H <sub>14</sub>  | 7900         | 1400            | 770             | BLD    | BDL | 610  | C <sub>6</sub> H <sub>6</sub>                            | 0.98           | 16.6 | 0.4   |
| 3-Methylpentane             | C <sub>6</sub> H <sub>14</sub>  | 4200         | 760             | 400             | 12     | BDL | 340  | C <sub>6</sub> H <sub>6</sub>                            | 0.98           | 9.50 | 0.2   |
| 2,2-Dimethylbutane          | C <sub>6</sub> H <sub>14</sub>  | 1400         | 250             | 130             | BLD    | BDL | 110  | C <sub>6</sub> H <sub>6</sub>                            | 0.98           | 2.66 | 0.07  |
| 2,3-Dimethylbutane          | C <sub>6</sub> H <sub>14</sub>  | 1500         | 280             | 150             | 16     | BDL | 130  | C <sub>6</sub> H <sub>6</sub>                            | 0.98           | 3.32 | 0.09  |
| 2-Methylhexane              | C <sub>7</sub> H <sub>16</sub>  | 160          | 20              | 11              | BLD    | BDL | 7.5  | C <sub>5</sub> H <sub>10</sub>                           | 0.98           | 0.19 | 0.002 |
| 3-Methylhexane              | C <sub>7</sub> H <sub>16</sub>  | 300          | 28              | 16              | BLD    | BDL | 12   | C <sub>5</sub> H <sub>10</sub>                           | 0.97           | 0.30 | 0.006 |
| 2,2-Dimethylpentane         | C <sub>7</sub> H <sub>16</sub>  | 12           | BLD             | BLD             | BLD    | BDL | BLD  | C <sub>9</sub> H <sub>10</sub>                           | 0.95           | 0.14 | 0.001 |

|                                 |                                 |      |      |     |     |     |     |                                 |      |         |          |
|---------------------------------|---------------------------------|------|------|-----|-----|-----|-----|---------------------------------|------|---------|----------|
| 2,3-Dimethylpentane             | C <sub>7</sub> H <sub>16</sub>  | 170  | 40   | 22  | BLD | BDL | 15  | C <sub>10</sub> H <sub>16</sub> | 0.96 | 0.16    | 0.006    |
| 2,4-Dimethylpentane             | C <sub>7</sub> H <sub>16</sub>  | 52   | 16   | 9   | BLD | BDL | 5.6 | C <sub>5</sub> H <sub>10</sub>  | 0.97 | 0.12    | 0.002    |
| 2,2,3-Trimethylbutane           | C <sub>7</sub> H <sub>16</sub>  | 94   | 34   | 20  | 7   | BDL | 13  | C <sub>6</sub> H <sub>10</sub>  | 0.99 | 0.07    | 0.002    |
| 2-Methylheptane                 | C <sub>8</sub> H <sub>18</sub>  | 430  | 15   | 7   | BLD | BDL | 9.6 | C <sub>8</sub> H <sub>16</sub>  | 0.97 | 1.08    | 0.002    |
| 3-Methylheptane                 | C <sub>8</sub> H <sub>18</sub>  | 160  | 5    | BLD | BDL | BDL | BLD | C <sub>8</sub> H <sub>16</sub>  | 1.00 | 0.47    | 0.0002   |
| 4-Methylheptane                 | C <sub>8</sub> H <sub>18</sub>  | 130  | 10   | 6   | BLD | BDL | 4.6 | C <sub>6</sub> H <sub>12</sub>  | 0.96 | 0.067   | 0.004    |
| 2,4-Dimethylhexane              | C <sub>8</sub> H <sub>18</sub>  | 26   | 6    | BLD | BDL | BDL | BLD | CH <sub>4</sub>                 | 0.98 | 0.00019 | 0.000001 |
| 2,5-Dimethylhexane              | C <sub>8</sub> H <sub>18</sub>  | 20   | BLD  | BLD | BDL | BDL | BLD | C <sub>10</sub> H <sub>16</sub> | 0.99 | 0.013   | 0.0002   |
| 2,3,4-Trimethylpentane          | C <sub>8</sub> H <sub>18</sub>  | 25   | 11.0 | 7.2 | BLD | BDL | 4.3 | C <sub>7</sub> H <sub>8</sub>   | 0.98 | 0.048   | 0.0006   |
| 2,2,4-Trimethylpentane          | C <sub>8</sub> H <sub>18</sub>  | 150  | BLD  | BLD | BDL | BDL | BLD |                                 |      |         |          |
| 2,2-Dimethylhexane              | C <sub>8</sub> H <sub>18</sub>  | BLD  | BLD  | BLD | BDL | BDL | BLD |                                 |      |         |          |
| 2,2,5-Trimethylhexane           | C <sub>9</sub> H <sub>20</sub>  | 2.6  | BLD  | BLD | BDL | BDL | BLD |                                 |      |         |          |
| 3,6-Dimethyloctane              | C <sub>10</sub> H <sub>22</sub> | 22   | 13.8 | 5.8 | BDL | BDL | 3.5 |                                 |      |         |          |
| <b>Cycloalkanes</b>             |                                 |      |      |     |     |     |     |                                 |      |         |          |
| Cyclopentane                    | C <sub>5</sub> H <sub>10</sub>  | 3000 | 460  | 260 | 7.7 | BDL | 220 | C <sub>6</sub> H <sub>6</sub>   | 0.98 | 6.71    | 0.2      |
| Methylcyclopentane              | C <sub>6</sub> H <sub>12</sub>  | 450  | 140  | 64  | BLD | BDL | 45  | C <sub>3</sub> H <sub>4</sub>   | 0.99 | 0.30    | 0.02     |
| Cyclohexane                     | C <sub>6</sub> H <sub>12</sub>  | 170  | 89   | 25  | BLD | BDL | 22  | C <sub>9</sub> H <sub>10</sub>  | 0.96 | 1.78    | 0.01     |
| Methylcyclohexane               | C <sub>7</sub> H <sub>14</sub>  | 370  | 45   | 20  | BLD | BDL | 17  | C <sub>8</sub> H <sub>16</sub>  | 0.98 | 3.52    | 0.01     |
| c-1,3-Dimethylcyclohexane       | C <sub>8</sub> H <sub>16</sub>  | 130  | 11   | 4   | BLD | BDL | 4.9 | C <sub>8</sub> H <sub>16</sub>  | 0.98 | 1.15    | 0.002    |
| t-1,2-Dimethylcyclohexane       | C <sub>8</sub> H <sub>16</sub>  | 93   | 30   | 19  | 5.1 | BDL | 11  | CH <sub>4</sub>                 | 0.96 | 0.0006  | 0.000004 |
| c-1,4/t-1,3-Dimethylcyclohexane | C <sub>8</sub> H <sub>16</sub>  | 63   | 9    | 7   | BLD | BDL | BLD | CH <sub>4</sub>                 | 0.98 | 0.0002  | 0.000001 |
| t-1,4-Dimethylcyclohexane       | C <sub>8</sub> H <sub>16</sub>  | 29   | 7    | BLD | BLD | BDL | BLD | C <sub>8</sub> H <sub>16</sub>  | 0.96 | 0.43    | 0.001    |
| c-1,2-Dimethylcyclohexane       | C <sub>8</sub> H <sub>16</sub>  | 29   | 10   | 5   | BLD | BDL | BLD | C <sub>7</sub> H <sub>15</sub>  | 0.95 | 2.20    | 0.002    |
| <b>Aromatic Hydrocarbons</b>    |                                 |      |      |     |     |     |     |                                 |      |         |          |
| Benzene                         | C <sub>6</sub> H <sub>6</sub>   | 370  | 100  | 68  | 39  | 19  | 58  | C <sub>5</sub> H <sub>10</sub>  | 1.00 | 1.31    | 0.01     |
| Toluene                         | C <sub>7</sub> H <sub>8</sub>   | 420  | 39   | 31  | BLD | BLD | BLD | C <sub>7</sub> H <sub>8</sub>   | 0.98 | 0.32    | 0.00     |
| m,p-Xylene                      | C <sub>8</sub> H <sub>10</sub>  | 290  | BLD  | BLD | BLD | BLD | BLD | C <sub>8</sub> H <sub>16</sub>  | 1.00 | 0.58    | 0.0005   |
| o-Xylene                        | C <sub>8</sub> H <sub>10</sub>  | 210  | BLD  | BLD | BLD | BDL | 8.6 | C <sub>8</sub> H <sub>16</sub>  | 0.98 | 0.31    | 0.0005   |
| Ethylbenzene                    | C <sub>8</sub> H <sub>10</sub>  | 120  | BLD  | BLD | BLD | BDL | BLD | C <sub>8</sub> H <sub>16</sub>  | 0.99 | 0.30    | 0.0005   |
| 1,2,3-Trimethylbenzene          | C <sub>9</sub> H <sub>12</sub>  | 21   | BLD  | BLD | BLD | BDL | BLD | C <sub>3</sub> H <sub>6</sub> O | 0.98 | 0.008   | 0.0003   |
| 1,2,4-Trimethylbenzene          | C <sub>9</sub> H <sub>12</sub>  | 36   | BLD  | BLD | BLD | BDL | BLD | C <sub>7</sub> H <sub>8</sub>   | 0.99 | 0.040   | 0.0004   |
| 1,3,5-Trimethylbenzene          | C <sub>9</sub> H <sub>12</sub>  | 9.9  | BLD  | BLD | BLD | BDL | BLD | C <sub>10</sub> H <sub>16</sub> | 0.96 | 0.012   | 0.0005   |
| 2-Ethyltoluene                  | C <sub>9</sub> H <sub>12</sub>  | 29   | BLD  | BLD | BLD | BDL | BLD | C <sub>10</sub> H <sub>16</sub> | 0.97 | 0.008   | 0.0003   |
| 3-Ethyltoluene                  | C <sub>9</sub> H <sub>12</sub>  | 38   | BLD  | BLD | BLD | BDL | BLD | C <sub>10</sub> H <sub>16</sub> | 0.99 | 0.015   | 0.0003   |
| 4-Ethyltoluene                  | C <sub>9</sub> H <sub>12</sub>  | 23   | BLD  | BLD | BLD | BDL | BLD | C <sub>10</sub> H <sub>16</sub> | 0.98 | 0.009   | 0.0002   |
| n-Propylbenzene                 | C <sub>9</sub> H <sub>12</sub>  | 20   | BLD  | BLD | BLD | BDL | BLD | C <sub>10</sub> H <sub>16</sub> | 0.92 | 0.018   | 0.0010   |
| iso-Propylbenzene               | C <sub>9</sub> H <sub>12</sub>  | 10   | BLD  | BLD | BLD | BDL | BLD | C <sub>11</sub> H <sub>22</sub> | 0.90 | 0.14    | 0.0002   |
| n-Butylbenzene                  | C <sub>10</sub> H <sub>14</sub> | BLD  | BLD  | BLD | BDL | BDL | BLD | C <sub>10</sub> H <sub>16</sub> | 0.92 | 0.003   | 0.0002   |
| iso-Butylbenzene                | C <sub>10</sub> H <sub>14</sub> | BLD  | BLD  | BLD | BDL | BDL | BLD | C <sub>3</sub> H <sub>4</sub> O | 0.86 | 0.025   | 0.0006   |

|                                  |                                 |     |     |     |     |     |     |                                 |      |         |         |
|----------------------------------|---------------------------------|-----|-----|-----|-----|-----|-----|---------------------------------|------|---------|---------|
| sec-Butylbenzene                 | C <sub>10</sub> H <sub>14</sub> | BLD | BLD | BLD | BDL | BDL | BLD | C <sub>4</sub> H <sub>6</sub> O | 0.91 | 0.004   | 0.0002  |
| tert-Butylbenzene                | C <sub>10</sub> H <sub>14</sub> | BLD | BLD | BLD | BDL | BDL | BLD |                                 |      |         |         |
| 1,2-Diethylbenzene               | C <sub>10</sub> H <sub>14</sub> | BLD | BLD | BLD | BDL | BDL | BLD | C <sub>2</sub> H <sub>4</sub> O | 0.99 | 0.00049 | 0.00004 |
| 1,3-Diethylbenzene               | C <sub>10</sub> H <sub>14</sub> | BLD | BLD | BLD | BDL | BDL | BLD | C <sub>10</sub> H <sub>16</sub> | 0.86 | 0.005   | 0.0004  |
| 1,4-Diethylbenzene               | C <sub>10</sub> H <sub>14</sub> | 13  | BLD | BLD | BDL | BDL | BLD | C <sub>10</sub> H <sub>16</sub> | 0.92 | 0.010   | 0.0005  |
| p-Cymene                         | C <sub>10</sub> H <sub>14</sub> | 34  | 10  | 9   | BLD | BLD | BLD | C <sub>8</sub> H <sub>16</sub>  | 0.96 | 0.48    | 0.0012  |
| Hexylbenzene                     | C <sub>12</sub> H <sub>18</sub> | 9.4 | 3.9 | BLD | BDL | BDL | BLD |                                 |      |         |         |
| Styrene                          | C <sub>8</sub> H <sub>8</sub>   | 35  | BLD | BLD | BLD | BLD | BLD | C <sub>10</sub> H <sub>16</sub> | 0.99 | 0.013   | 0.0002  |
| Indane (2,3-Dihydroindene)       | C <sub>9</sub> H <sub>10</sub>  | 14  | BLD | BLD | BLD | BDL | BLD | C <sub>9</sub> H <sub>10</sub>  | 0.99 | 0.020   | 0.0001  |
| Naphthalene                      | C <sub>10</sub> H <sub>8</sub>  | 11  | BLD | BLD | BLD | BLD | BLD |                                 |      |         |         |
| <b>Straight Chain Alkenes</b>    |                                 |     |     |     |     |     |     |                                 |      |         |         |
| Ethene                           | C <sub>2</sub> H <sub>4</sub>   | 520 | 280 | 210 | 120 | 41  | 140 | C <sub>6</sub> H <sub>10</sub>  | 0.95 | 0.6     | 0.04    |
| Propene                          | C <sub>3</sub> H <sub>6</sub>   | 120 | 68  | 58  | 32  | BLD | 40  | C <sub>5</sub> H <sub>10</sub>  | 0.95 | 0.37    | 0.01    |
| 1-Butene/2-Methylpropene         | C <sub>4</sub> H <sub>8</sub>   | 69  | 33  | 28  | BLD | BLD | 21  | C <sub>7</sub> H <sub>15</sub>  | 0.93 | 2.54    | 0.003   |
| c-2-Butene                       | C <sub>4</sub> H <sub>8</sub>   | BLD | BLD | BLD | BLD | BDL | BLD | C <sub>4</sub> H <sub>8</sub> O | 0.99 | 0.019   | 0.0001  |
| t-2-Butene                       | C <sub>4</sub> H <sub>8</sub>   | BLD | BLD | BLD | BLD | BDL | BLD | C <sub>9</sub> H <sub>12</sub>  | 0.99 | 0.019   | 0.0002  |
| 1-Pentene                        | C <sub>5</sub> H <sub>10</sub>  | 31  | BLD | BLD | BLD | BDL | BLD | C <sub>6</sub> H <sub>6</sub>   | 0.97 | 0.055   | 0.002   |
| c-2-Pentene                      | C <sub>5</sub> H <sub>10</sub>  | 28  | BLD | BLD | BDL | BDL | BLD | C <sub>6</sub> H <sub>6</sub>   | 0.98 | 0.063   | 0.002   |
| t-2-Pentene                      | C <sub>5</sub> H <sub>10</sub>  | 60  | 11  | 6.1 | BLD | BDL | 4.8 | C <sub>4</sub> H <sub>8</sub>   | 0.98 | 0.053   | 0.003   |
| 1-Hexene/2-Methyl-1-Pentene      | C <sub>6</sub> H <sub>12</sub>  | 100 | BLD | BLD | BLD | BDL | BLD | C <sub>6</sub> H <sub>6</sub>   | 0.98 | 0.21    | 0.005   |
| c-2-Hexene                       | C <sub>6</sub> H <sub>12</sub>  | 14  | BLD | BLD | BDL | BDL | BLD |                                 |      |         |         |
| t-2-Hexene                       | C <sub>6</sub> H <sub>12</sub>  | 31  | BLD | BLD | BDL | BDL | BLD | C <sub>6</sub> H <sub>6</sub>   | 0.97 | 0.065   | 0.002   |
| t-3-Heptene                      | C <sub>7</sub> H <sub>14</sub>  | BLD | BLD | BLD | BDL | BDL | BLD |                                 |      |         |         |
| t-2-Heptene                      | C <sub>7</sub> H <sub>14</sub>  | BLD | BLD | BLD | BDL | BDL | BLD | C <sub>10</sub> H <sub>16</sub> | 0.98 | 0.003   | 0.0001  |
| 1-Heptene                        | C <sub>7</sub> H <sub>14</sub>  | 9   | BLD | BLD | BDL | BDL | BLD |                                 |      |         |         |
| c-2-Heptene                      | C <sub>7</sub> H <sub>14</sub>  | BLD | BLD | BLD | BDL | BDL | BLD |                                 |      |         |         |
| c-3-Heptene                      | C <sub>7</sub> H <sub>14</sub>  | BLD | BLD | BLD | BDL | BDL | BLD |                                 |      |         |         |
| 1-Octene                         | C <sub>8</sub> H <sub>16</sub>  | 70  | 30  | 17  | BDL | BDL | 9.1 | C <sub>10</sub> H <sub>16</sub> | 1.00 | 0.27    | 0.003   |
| t-2-Octene                       | C <sub>8</sub> H <sub>16</sub>  | 41  | BLD | BLD | BDL | BDL | BLD |                                 |      |         |         |
| 1-Nonene                         | C <sub>9</sub> H <sub>18</sub>  | 5.6 | BLD | BLD | BDL | BDL | BLD |                                 |      |         |         |
| 1-Decene                         | C <sub>10</sub> H <sub>20</sub> | 100 | 70  | 47  | 13  | BDL | 24  |                                 |      |         |         |
| 1-Undecene                       | C <sub>11</sub> H <sub>22</sub> | 53  | BLD | BLD | BDL | BDL | BLD |                                 |      |         |         |
| <b>Branched and Cycloalkenes</b> |                                 |     |     |     |     |     |     |                                 |      |         |         |
| 2-Methyl-1-Butene                | C <sub>5</sub> H <sub>10</sub>  | 43  | 9   | BLD | BLD | BDL | BLD | C <sub>6</sub> H <sub>6</sub>   | 0.98 | 0.097   | 0.002   |
| 2-Methyl-2-Butene                | C <sub>5</sub> H <sub>10</sub>  | 120 | 16  | 11  | BLD | BDL | 8.5 | C <sub>5</sub> H <sub>8</sub>   | 0.99 | 0.074   | 0.005   |
| 3-Methyl-1-Butene                | C <sub>5</sub> H <sub>10</sub>  | 4.6 | BLD | BLD | BLD | BDL | BLD | C <sub>10</sub> H <sub>16</sub> | 0.96 | 0.011   | 0.0004  |
| 3-Methyl-1-Pentene               | C <sub>6</sub> H <sub>12</sub>  | 20  | BLD | BLD | BDL | BDL | BLD | C <sub>10</sub> H <sub>14</sub> | 1.00 | 0.12    | 0.0005  |
| 4-Methyl-1-Pentene               | C <sub>6</sub> H <sub>12</sub>  | 21  | BLD | BLD | BDL | BDL | BLD | C <sub>10</sub> H <sub>14</sub> | 1.00 | 0.13    | 0.0004  |
| c-3-Methyl-2-Pentene             | C <sub>6</sub> H <sub>12</sub>  | 26  | BLD | BLD | BDL | BDL | BLD | C <sub>5</sub> H <sub>10</sub>  | 0.99 | 0.099   | 0.0007  |

|                                   |                                               |      |     |     |     |     |     |                                 |      |       |        |
|-----------------------------------|-----------------------------------------------|------|-----|-----|-----|-----|-----|---------------------------------|------|-------|--------|
| t-3-Methyl-2-Pentene              | C <sub>6</sub> H <sub>12</sub>                | 13   | BLD | BLD | BDL | BDL | BLD | C <sub>10</sub> H <sub>14</sub> | 1.00 | 0.076 | 0.0002 |
| t-4-Methyl-2-Pentene              | C <sub>6</sub> H <sub>12</sub>                | 69   | 16  | BLD | BDL | BDL | BLD |                                 |      |       |        |
| c-4-Methyl-2-Pentene              | C <sub>6</sub> H <sub>12</sub>                | 43   | BLD | BLD | BDL | BDL | BLD |                                 |      |       |        |
| 2-Ethyl-1-Butene                  | C <sub>6</sub> H <sub>12</sub>                | BLD  | BLD | BLD | BDL | BDL | BLD |                                 |      |       |        |
| Cyclopentene                      | C <sub>5</sub> H <sub>8</sub>                 | 56   | BLD | BLD | BLD | BDL | BLD | C <sub>5</sub> H <sub>8</sub>   | 0.98 | 0.035 | 0.003  |
| 1-Methylcyclopentene              | C <sub>6</sub> H <sub>10</sub>                | BLD  | BLD | BLD | BDL | BDL | BLD |                                 |      |       |        |
| Cyclohexene                       | C <sub>6</sub> H <sub>10</sub>                | BLD  | BLD | BLD | BDL | BDL | BLD |                                 |      |       |        |
| 1-Methylcyclohexene               | C <sub>7</sub> H <sub>14</sub>                | BLD  | BLD | BLD | BDL | BDL | BLD | C <sub>3</sub> H <sub>4</sub>   | 0.98 | 0.006 | 0.0005 |
| <b>Alkynes and Dienes</b>         |                                               |      |     |     |     |     |     |                                 |      |       |        |
| Ethyne                            | C <sub>2</sub> H <sub>2</sub>                 | 410  | 140 | 120 | 84  | 53  | 97  | C <sub>7</sub> H <sub>15</sub>  | 0.96 | 14.6  | 0.01   |
| Propyne                           | C <sub>3</sub> H <sub>4</sub>                 | 15   | BLD | BLD | BLD | BDL | BLD | C <sub>10</sub> H <sub>16</sub> | 0.99 | 0.061 | 0.001  |
| 1-Butyne                          | C <sub>4</sub> H <sub>6</sub>                 | BLD  | BLD | BLD | BDL | BDL | BLD | C <sub>2</sub> H <sub>4</sub> O | 0.99 | 0.001 | 0.0001 |
| 1,3-Butadiene                     | C <sub>4</sub> H <sub>6</sub>                 | 7    | BLD | BLD | BLD | BDL | BLD | C <sub>10</sub> H <sub>16</sub> | 0.99 | 0.020 | 0.0004 |
| <b>Biogenic Hydrocarbons</b>      |                                               |      |     |     |     |     |     |                                 |      |       |        |
| Isoprene (2-Methyl-1,3-Butadiene) | C <sub>5</sub> H <sub>8</sub>                 | 1000 | 660 | 541 | 270 | 110 | 360 | CH <sub>4</sub>                 | 1.00 | 0.009 | 2E-05  |
| a-Pinene                          | C <sub>10</sub> H <sub>16</sub>               | 90   | 74  | 68  | 39  | 20  | 46  | C <sub>10</sub> H <sub>16</sub> | 0.96 | 0.20  | 7E-03  |
| b-Pinene                          | C <sub>10</sub> H <sub>16</sub>               | 100  | 74  | 65  | 24  | BDL | 35  | C <sub>10</sub> H <sub>16</sub> | 0.96 | 0.28  | 1E-02  |
| Limonene                          | C <sub>10</sub> H <sub>16</sub>               | 62   | 21  | BLD | BLD | BDL | BLD |                                 |      |       |        |
| Camphene                          | C <sub>10</sub> H <sub>16</sub>               | 86   | 59  | 53  | 19  | BLD | 29  |                                 |      |       |        |
| <b>Chlorinated Hydrocarbons</b>   |                                               |      |     |     |     |     |     |                                 |      |       |        |
| Chloromethane                     | CH <sub>3</sub> Cl                            | 690  | 650 | 620 | 600 | 460 | 600 |                                 |      |       |        |
| Dichloromethane                   | CH <sub>2</sub> Cl <sub>2</sub>               | 230  | 74  | 71  | 67  | 54  | 69  |                                 |      |       |        |
| Chloroform                        | CHCl <sub>3</sub>                             | 30   | 21  | 19  | 17  | 13  | 17  |                                 |      |       |        |
| 1,1-Dichloroethene                | C <sub>2</sub> H <sub>2</sub> Cl <sub>2</sub> | BLD  | BLD | BLD | BDL | BDL | BLD |                                 |      |       |        |
| 1,2-Dichloroethane                | C <sub>2</sub> H <sub>4</sub> Cl <sub>2</sub> | 17   | 14  | 14  | 13  | 11  | 13  |                                 |      |       |        |
| c-1,2-Dichloroethene              | C <sub>2</sub> H <sub>2</sub> Cl <sub>2</sub> | BLD  | BLD | BLD | BDL | BDL | BLD |                                 |      |       |        |
| Hexachlorobutadiene               | C <sub>4</sub> Cl <sub>6</sub>                | BLD  | BLD | BLD | BLD | BDL | BLD |                                 |      |       |        |

### S10. Comparison of Overlapping Aromatic Hydrocarbon Species by PTRMS and Canister Sampling/GC MS Analysis.

Multiple aromatic hydrocarbons were detected using both the proton transfer reaction time-of-flight mass spectrometry (PTRMS) measurements and the canister sampling/GCMS analysis methods. In the comparisons between these two measurement methods, all samples above detection limits of both methods were used. PTR-ToF-MS results were averaged over corresponding canister sampling period (approximately 20 seconds). In the comparison, PTR-ToF-MS C<sub>8</sub>H<sub>10</sub> = canister o,m+p-xylenes + ethylbenzene, PTR-ToF-MS C<sub>9</sub>H<sub>12</sub> = canister propyl-benzene + 1,2,3-trimethyl-benzene + 1,2,4-trimethyl-benzene + 1,3,5-trimethyl-benzene + 1-ethyl,3-methyl-benzene + 1-ethyl,4-methyl-benzene + 1-ethyl,2-methyl-benzene + 1-methylethyl-benzene. All these compounds were detected by PTR-ToF-MS as C<sub>8</sub>H<sub>10</sub> and C<sub>9</sub>H<sub>12</sub> isomers.



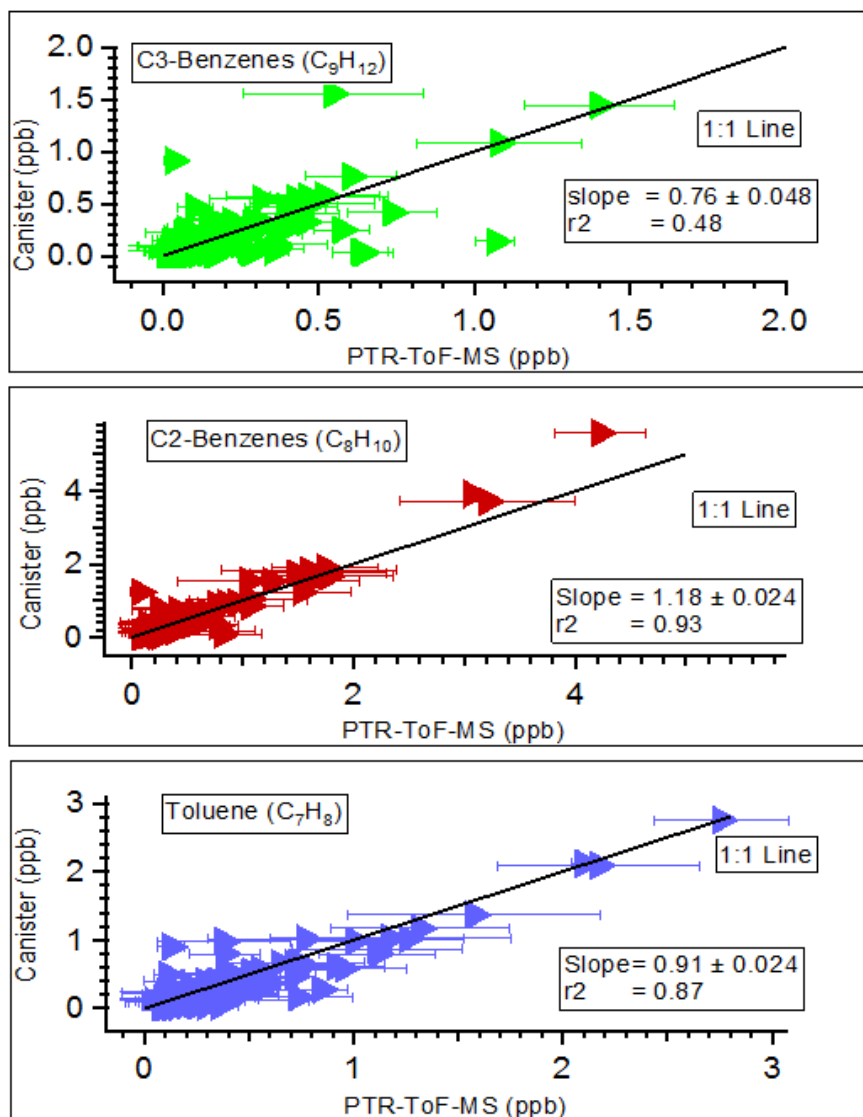

Figure S5. Comparison of three aromatic hydrocarbons measured using the PTRMS and using canister sampling/GCMS analysis. Error bars are 1 standard deviation of the PTRMS concentrations averaged over the corresponding canister sampling times (20 sec duration each sample).

## S11. Fractions of Contributions to VOC Emissions from Main Sources

Table S12. The fractions of contributions to VOC emissions by the five main sources in each of the four major oil sands surface mining facilities SML, SUN, CNRL, and SAJ. The results are calculated using the emissions reports for these sources (Ref 7).

| Sources                   | VOC emission fractions (%) |     |      |     |
|---------------------------|----------------------------|-----|------|-----|
|                           | SML                        | SUN | CNRL | SAJ |
| Stacks - oil sands        | 2                          | 1   | 6    | 0.3 |
| Plant Fugitives           | 44                         | 52  | 46   | 24  |
| Mine Fleet                | 4                          | 10  | 5    | 19  |
| Mine Face                 | 9                          | 9   | 17   | 16  |
| Tailings Management Areas | 41                         | 28  | 26   | 42  |

## S10. References

1. Atkinson R et al. (2006) Evaluated kinetic and photochemical data for atmospheric chemistry: Volume II – gas phase reactions of organic species, *Atmos Chem Phys* 6:3625-4055. doi:10.5194/acp-6-3625-2006.
2. U.S. Environmental Protection Agency, Predictive Models and Tools for Assessing Chemicals under the Toxic Substances Control Act (TSCA).The NPRI Data Quality Management Framework. <http://www.ec.gc.ca/inrp-npri/default.asp?lang=En&n=23EAF55A-1>. Accessed July 2016.
3. Ligio J et al. (2016) Oil sands operations as a large source of secondary organic aerosols. *Nature*. Doi:10.1038/nature17646.
4. Canada Gazette (2012) Part 1, Vol. 146, no. 52, pp. 3642-3671 [see <http://www.gazette.gc.ca/rp-pr/p1/2012/2012-12-29/pdf/q1-14652.pdf>] (version of NPRI reporting requirements in force for 2013 reporting year)
5. The NPRI Data Quality Management Framework. <http://www.ec.gc.ca/inrp-npri/default.asp?lang=En&n=23EAF55A-1>. Accessed July 2016
6. Moran MD et al. (2003) An alternate approach to VOC speciation reporting. Proc. 12th Emission Inventory Conference, April 27-May 1, San Diego, 15 pp. <http://www.epa.gov/ttn/chief/conference/ei12/index.html> ]; A summary of the reporting requirements for the oil and gas sector is given at <https://www.ec.gc.ca/inrp-npri/default.asp?lang=En&n=5B72775D-1#n3>.
7. Davies M et al. (2012) Lower Athabasca Region Source and Emission Inventory. Prepared for the Cumulative Environmental Management Association (CEMA), Air Working Group by Stantec Consulting Ltd., ENVIRON International Corporation and Clearstone Engineering Ltd. 274 pp. <http://library.cemaonline.ca/ckan/dataset/Ocfaa447-410a-4339-b51f-e64871390efe/resource/fba8a3b0-72df-45ed-bf12-8ca254fdd5b1/download/larsourceandemissionsinventory.pdf>. Accessed April 11, 2016.

8. Alberta Energy Regulator (2013) ST39: Alberta Movable Oil Sands Plant Statistics. Report St39-2013. <http://www.aer.ca/data-and-publications/statistical-reports/st39>.
9. Watson J et al. (2013) Characterization of Real-World Emissions from Nonroad Mining Trucks in the Athabasca Oil Sands Region during September, 2009, DRI Contract Number: 010109-123109, Report submitted to Wood Buffalo Environmental Association, 2013. [http://www.google.ca/url?sa=t&rct=j&q=&esrc=s&source=web&cd=4&ved=0ahUKEwiSo\\_Oy-5LRAhVL7oMKHTwCAN4QFgg\\_MAM&url=http%3A%2F%2Fwww.wbea.org%2Fdownload%2Fwatson\\_j\\_g\\_et\\_al\\_2013\\_characterization\\_of\\_real\\_world\\_emissions\\_from\\_nonroad\\_mining\\_trucks\\_in\\_the\\_athabasca\\_oil\\_sands\\_region\\_during\\_september\\_2009.pdf&usg=AFQjCNE5AM6SI2oMUjAFO26dFdM3qHwEbhQ](http://www.google.ca/url?sa=t&rct=j&q=&esrc=s&source=web&cd=4&ved=0ahUKEwiSo_Oy-5LRAhVL7oMKHTwCAN4QFgg_MAM&url=http%3A%2F%2Fwww.wbea.org%2Fdownload%2Fwatson_j_g_et_al_2013_characterization_of_real_world_emissions_from_nonroad_mining_trucks_in_the_athabasca_oil_sands_region_during_september_2009.pdf&usg=AFQjCNE5AM6SI2oMUjAFO26dFdM3qHwEbhQ) (accessed Dec 26, 2016)
10. Curren KC et al. (2006) Ambient air 1,3-butadiene concentration in Canada (1995-2003): seasonal, day of week variations, trends, and source influences. *Atmos Environ* 40(1):170-181. doi:10.1016/j.atmosenv.2005.09.025.
11. Baray S et al. (2015) Quantifying sources of methane in the Alberta oil sands, Oral presentation at the American Geophysical Union Fall Meeting, Dec 2015, San Francisco, California, USA.
